# Supplementary material for: Tubulin mRNA stability is sensitive to change in microtubule dynamics caused by multiple physiological and toxic cues
Source: PLoS Biol. 2019 Apr 9;17(4):e3000225. doi: 10.1371/journal.pbio.3000225 (PMC6474637; doi:10.1371/journal.pbio.3000225)
Supplement: S1 Data — Each spread sheet contains data from one or more panels of a figure, annotated in its name. Given are the measurements from all biological replicates performed. (XLSX) [file pbio.3000225.s007.xlsx]

## Sheet: Fig. 1a-b
Low dose and high dose 24h
ENSGID	CA4.100nM	CA4.1nM	PTX.300nM	PTX.3nM	logCPM	p.CA4.100nM	p.CA4.1nM	p.PTX.300nM	p.PTX.3nM	GeneName
ENSG00000001617	-0.447861	-0.0570163	-0.0382732	0.00254296	8.62544	2.37046e-10	0.411236	0.580875	0.970668	SEMA3F
ENSG00000002919	0.285925	-0.0526004	-0.262325	-0.176831	4.23848	0.0204356	0.682975	0.0475055	0.176321	SNX11
ENSG00000004399	-0.289699	-0.0735385	-0.153113	-0.16278	5.59781	0.00431929	0.457293	0.124593	0.102611	PLXND1
ENSG00000006062	0.0818404	-0.0447041	-0.243828	-0.251136	4.64789	0.478109	0.702737	0.0422271	0.0366283	MAP3K14
ENSG00000006327	0.910971	-0.181618	-0.145274	-0.0965721	7.5516	6.91086e-39	0.01328	0.0470585	0.185716	TNFRSF12A
ENSG00000008311	0.441383	0.35918	0.272375	0.251123	4.53504	0.000386444	0.00422859	0.0317994	0.0484135	AASS
ENSG00000010165	0.0777859	-0.274242	-0.143299	-0.2331	4.82195	0.470882	0.0146212	0.194557	0.0368816	METTL13
ENSG00000010295	-0.300149	0.278454	0.097882	0.232228	6.51514	0.000747596	0.000988395	0.253354	0.00616791	IFFO1
ENSG00000013441	-0.428203	0.0124394	0.147513	0.22785	6.8178	4.17821e-07	0.878674	0.0668921	0.00441887	CLK1
ENSG00000013563	-0.254671	-0.24237	-0.246669	-0.146502	4.9623	0.0262385	0.0338	0.0307655	0.193946	DNASE1L1
ENSG00000029363	0.272178	0.204031	0.0842533	0.0161738	6.69575	0.000646088	0.0108976	0.297024	0.842162	BCLAF1
ENSG00000033867	0.906736	0.12544	0.304751	0.161329	6.90695	4.16193e-32	0.119633	0.000122589	0.0442736	SLC4A7
ENSG00000037042	0.0239834	0.511672	0.41213	0.219964	4.53815	0.862522	7.65172e-05	0.00162625	0.101466	TUBG2
ENSG00000038427	-0.277522	0.0695155	0.0977849	0.040571	10.5474	1.70475e-05	0.275599	0.126049	0.524678	VCAN
ENSG00000039319	0.299739	0.191778	0.218225	0.0907133	5.20853	0.00471173	0.0735849	0.0409714	0.402467	ZFYVE16
ENSG00000039560	0.655145	0.0807042	0.151701	0.0610798	8.69518	1.76251e-22	0.236295	0.0255904	0.370345	RAI14
ENSG00000043143	-0.681623	0.0998395	0.187166	0.226418	6.44619	1.13694e-13	0.241899	0.0269006	0.00726005	JADE2
ENSG00000047188	-0.191816	0.305138	0.275133	0.120682	5.63545	0.0613624	0.0016836	0.00466879	0.22203	YTHDC2
ENSG00000047932	0.257248	0.185836	0.119386	0.0843583	6.40821	0.00202013	0.0265278	0.155867	0.317582	GOPC
ENSG00000048052	1.27341	-0.0192195	0.434785	0.138977	5.27618	2.12814e-40	0.860287	2.63781e-05	0.193738	HDAC9
ENSG00000049759	0.413192	0.148158	0.150326	0.159423	6.77382	1.27606e-07	0.0627013	0.0587322	0.0448999	NEDD4L
ENSG00000050820	-0.00569088	0.0890623	-0.167453	-0.0152825	7.06261	0.941067	0.243862	0.0312983	0.842499	BCAR1
ENSG00000060982	0.176497	0.157914	0.0953909	0.123003	7.59444	0.0141395	0.0279589	0.18544	0.0873302	BCAT1
ENSG00000062716	0.580034	0.382293	0.133111	0.044926	7.45738	4.00092e-15	2.83805e-07	0.0778948	0.553997	VMP1
ENSG00000064042	0.501133	0.0561151	0.128578	0.0805137	8.58547	1.03356e-13	0.408744	0.0576131	0.235268	LIMCH1
ENSG00000064607	0.403034	0.325696	0.185001	0.119243	7.12717	1.8602e-07	2.75522e-05	0.018424	0.129813	SUGP2
ENSG00000065802	0.850807	-0.190449	-0.0680287	-0.0692226	6.90617	1.7808e-29	0.0179789	0.393507	0.385171	ASB1
ENSG00000066279	0.0809971	0.194292	0.430875	0.171596	4.44823	0.528281	0.124389	0.000426739	0.175853	ASPM
ENSG00000067113	-0.910153	-0.0587145	-0.262624	-0.256926	4.61427	3.25824e-11	0.629415	0.0354769	0.0395533	PLPP1
ENSG00000067836	-0.467453	-0.0403348	-0.218968	-0.0413302	5.14021	4.13984e-05	0.70878	0.0469369	0.701645	ROGDI
ENSG00000068383	0.49466	-0.333248	-0.293779	-0.188627	5.20957	2.48014e-07	0.00145124	0.00475719	0.066705	INPP5A
ENSG00000068885	-0.0412569	0.272667	0.286828	0.204747	5.65545	0.688824	0.00610222	0.00381253	0.040786	IFT80
ENSG00000070413	-0.30871	-0.215208	-0.209167	-0.154219	6.85418	9.0582e-05	0.00602377	0.00750843	0.0477697	DGCR2
ENSG00000070423	0.380394	0.0714079	-0.284362	-0.263631	4.9735	0.000360803	0.518081	0.0137274	0.0219687	RNF126
ENSG00000070610	-0.19445	0.239772	0.167219	0.164214	7.49345	0.0131969	0.00163605	0.0287056	0.0317384	GBA2
ENSG00000070882	-0.130467	0.304435	0.217582	0.199389	5.46156	0.214806	0.00230024	0.0308053	0.0482629	OSBPL3
ENSG00000071127	0.745057	-0.0218642	-0.0177673	-0.0270481	9.25264	1.32398e-30	0.739502	0.787053	0.681106	WDR1
ENSG00000072110	0.958762	-0.0723252	-0.0661299	-0.054913	9.0302	7.86645e-49	0.27704	0.32024	0.409264	ACTN1
ENSG00000073921	0.467632	0.116192	0.135453	0.0733202	8.90889	1.86023e-12	0.0825817	0.0427601	0.27406	PICALM
ENSG00000074621	-0.201427	0.132262	0.155952	0.266158	4.22409	0.160787	0.33363	0.252438	0.0474563	SLC24A1
ENSG00000075089	0.290997	0.277568	0.305279	0.278746	4.35876	0.0324887	0.0410546	0.0239694	0.0398528	ACTR6
ENSG00000075391	0.579566	0.0650221	0.0846055	0.169736	6.19713	2.74844e-12	0.45218	0.326343	0.0473521	RASAL2
ENSG00000075618	0.207133	-0.150688	-0.248627	-0.113877	7.93388	0.00292347	0.0331386	0.000467582	0.106576	FSCN1
ENSG00000075624	0.710083	-0.00619301	-0.138896	-0.0808592	11.2322	1.80208e-29	0.922219	0.0287238	0.20342	ACTB
ENSG00000077238	0.00953672	0.280829	0.197975	0.0763898	5.93264	0.921217	0.00288326	0.0367195	0.425703	IL4R
ENSG00000078018	1.15004	0.177259	0.360997	0.278394	5.79866	5.06328e-39	0.0636931	0.00011481	0.00325176	MAP2
ENSG00000078124	-0.0472641	-0.305548	0.0490894	-0.111496	4.58983	0.676285	0.00886633	0.659807	0.327083	ACER3
ENSG00000078902	0.0750984	-0.165859	-0.257675	-0.201271	6.18186	0.380967	0.0581043	0.00349381	0.0217877	TOLLIP
ENSG00000079257	-0.351318	0.152421	0.147315	0.129058	8.89773	3.75303e-07	0.0239422	0.0290493	0.0560332	LXN
ENSG00000080823	0.675531	0.266309	0.254872	0.160836	5.72297	2.95334e-13	0.00573147	0.00812721	0.0981662	MOK
ENSG00000081307	0.35563	0.276803	0.186564	0.0278865	5.37582	0.000444264	0.00662711	0.0695991	0.78985	UBA5
ENSG00000082898	0.0283503	0.326562	0.30968	0.229518	7.92368	0.696471	5.04261e-06	1.53446e-05	0.00140621	XPO1
ENSG00000083799	0.671771	0.0431754	0.219751	0.0776465	6.63394	2.91134e-17	0.603293	0.00729327	0.348188	CYLD
ENSG00000083857	0.60137	0.123032	0.140653	0.0632895	7.42661	3.02333e-17	0.0901952	0.0530334	0.385096	FAT1
ENSG00000084092	-0.38805	-0.290116	-0.268497	-0.243599	5.37691	0.00025146	0.00550888	0.00996267	0.0190327	NOA1
ENSG00000085224	-0.0385554	0.175399	0.230582	0.152179	7.0086	0.626968	0.024759	0.00304683	0.0516346	ATRX
ENSG00000088340	0.169362	0.425994	0.162016	0.0190832	7.36378	0.0261402	1.26222e-08	0.0337925	0.803765	FER1L4
ENSG00000090238	-0.60234	-0.0359375	-0.241201	-0.00815102	5.52211	1.0842e-07	0.733347	0.0255041	0.938137	YPEL3
ENSG00000090432	-0.225531	-0.157602	-0.283109	-0.16207	5.25117	0.0294908	0.124682	0.00650185	0.114043	MUL1
ENSG00000090615	0.545333	-0.0315223	-0.152604	-0.143763	6.98297	2.21178e-13	0.682086	0.0491286	0.0636543	GOLGA3
ENSG00000090924	0.0564934	0.433122	0.230415	0.265473	5.97614	0.545197	1.62593e-06	0.0120585	0.00373179	PLEKHG2
ENSG00000092969	1.13158	-0.0681232	-0.286796	-0.0781336	6.09408	5.10788e-43	0.448841	0.0018117	0.385718	TGFB2
ENSG00000093183	-0.19302	-0.183599	-0.140744	-0.104337	6.07089	0.029101	0.0375286	0.109148	0.233433	SEC22C
ENSG00000095321	-0.230653	-0.199544	-0.152478	-0.161755	6.33011	0.00736848	0.0200004	0.0740285	0.0582825	CRAT
ENSG00000095564	0.250153	0.0951745	0.186741	0.0142481	7.15931	0.00108591	0.218343	0.0151292	0.854488	BTAF1
ENSG00000096746	0.176213	0.24003	0.188113	0.0616063	7.07262	0.0233245	0.00190635	0.015294	0.43125	HNRNPH3
ENSG00000097021	0.277674	-0.16619	-0.237305	-0.0684634	5.13433	0.00439342	0.104335	0.0213481	0.498196	ACOT7
ENSG00000099260	-1.1915	-0.0216578	0.336856	0.192058	4.26998	1.14924e-10	0.888698	0.0226603	0.202148	PALMD
ENSG00000099365	0.47593	0.465868	0.282293	0.256829	4.92018	8.68479e-05	0.000123636	0.0226167	0.0390295	STX1B
ENSG00000099785	-0.119741	-0.259403	-0.219027	-0.166725	4.95102	0.271624	0.0190765	0.0464271	0.127077	2019-03-02
ENSG00000099860	1.03248	-0.122565	-0.284282	-0.333187	4.57063	6.6042e-22	0.318482	0.023454	0.0082659	GADD45B
ENSG00000100292	-1.50445	-0.197116	-0.149297	-0.325074	5.56425	1.10138e-46	0.0288026	0.0957365	0.000368189	HMOX1
ENSG00000100300	-0.160383	-0.0939753	-0.256493	-0.121822	7.54397	0.028615	0.1979	0.000497065	0.0954301	TSPO
ENSG00000100596	0.0455932	-0.206663	-0.254303	-0.123383	5.91901	0.608601	0.0234182	0.00546135	0.172051	SPTLC2
ENSG00000100650	0.23012	0.272569	0.190438	0.0886217	8.04849	0.00134684	0.000143752	0.00836872	0.220756	SRSF5
ENSG00000100941	0.306555	0.313671	0.178061	0.000706099	7.13193	7.35996e-05	4.96458e-05	0.0226746	0.992805	PNN
ENSG00000100968	-0.575944	0.310822	0.196318	0.0770225	6.77684	2.54952e-10	0.000224989	0.0208068	0.369513	NFATC4
ENSG00000100997	-0.186187	-0.113761	-0.0560835	-0.0833782	7.29135	0.0152625	0.136113	0.460851	0.273697	ABHD12
ENSG00000101104	0.583882	0.497758	0.309064	0.143822	4.68554	2.02466e-06	6.07756e-05	0.0150484	0.268658	PABPC1L
ENSG00000101199	0.749914	0.190716	0.0671158	0.0104792	7.27017	1.60535e-24	0.0115451	0.377758	0.890802	ARFGAP1
ENSG00000101290	-0.371589	-0.225006	-0.0980414	-0.0370606	6.37372	2.51558e-05	0.00962099	0.253468	0.664297	CDS2
ENSG00000101400	-0.49478	-0.14519	-0.349695	-0.2456	4.381	0.00016895	0.245373	0.00649275	0.0524631	SNTA1
ENSG00000101439	-0.164346	-0.0625517	-0.169136	0.00468399	8.43475	0.0179542	0.36562	0.0148409	0.945797	CST3
ENSG00000102100	0.204243	-0.211918	-0.206294	-0.249264	5.6006	0.0257567	0.0263113	0.0303077	0.00918355	SLC35A2
ENSG00000102189	0.460848	0.11256	0.234141	0.147557	5.66341	6.04125e-07	0.238587	0.0129831	0.12056	EEA1
ENSG00000102531	0.492273	0.0631858	0.183214	0.200324	7.33422	2.66808e-11	0.403393	0.0146528	0.00754877	FNDC3A
ENSG00000102908	-0.0204161	0.287726	0.236522	0.20354	6.96596	0.799991	0.000260476	0.0027513	0.0101472	NFAT5
ENSG00000103066	0.0080834	-0.188861	-0.182925	-0.172343	6.25596	0.924287	0.028935	0.0342054	0.0458143	PLA2G15
ENSG00000103257	1.18333	-0.21598	-0.157502	-0.189737	7.25661	2.37753e-64	0.00363277	0.0331288	0.0105009	SLC7A5
ENSG00000103260	-0.325234	-0.0946818	-0.247548	-0.153998	7.60428	1.25646e-05	0.197079	0.000830209	0.0364835	METRN
ENSG00000103363	-0.0879084	-0.0912457	-0.160776	-0.0247125	6.95907	0.259689	0.241995	0.0401039	0.750102	ELOB
ENSG00000104047	0.554875	0.310184	0.318375	0.109982	4.359	1.62461e-05	0.0193996	0.0161613	0.4188	DTWD1
ENSG00000104177	0.678637	0.208851	0.21283	0.093214	6.41596	4.85516e-16	0.0160003	0.0139548	0.286673	MYEF2
ENSG00000104365	0.456443	0.292337	0.24022	0.15237	6.73721	1.69936e-08	0.000359042	0.00345071	0.0654273	IKBKB
ENSG00000104783	-0.0288801	0.179707	0.15201	0.258051	7.80283	0.696151	0.0140079	0.0378724	0.000394751	KCNN4
ENSG00000104870	-0.191983	-0.114937	-0.236884	-0.102935	5.96682	0.041576	0.218645	0.0123813	0.269761	FCGRT
ENSG00000104881	0.799403	0.0894592	-0.0704768	0.0744724	5.51553	4.26562e-17	0.382146	0.498545	0.467179	PPP1R13L
ENSG00000105135	-0.251758	-0.0620514	-0.187136	-0.189595	6.03011	0.00751547	0.501364	0.04504	0.0424111	ILVBL
ENSG00000105229	-0.267655	-0.133261	-0.294432	-0.168915	4.39853	0.0397557	0.296261	0.0237832	0.186925	PIAS4
ENSG00000105281	0.421333	-0.124301	-0.307941	-0.206373	6.15914	4.38846e-07	0.154535	0.000523138	0.0189326	SLC1A5
ENSG00000105325	-0.231452	-0.0536057	-0.119182	0.0189405	6.06305	0.0105035	0.546135	0.181989	0.829904	FZR1
ENSG00000105339	0.185619	0.401991	0.28291	0.35485	4.99738	0.121929	0.000576433	0.0168607	0.00248559	DENND3
ENSG00000105426	-0.446252	-0.0794404	-0.142089	-0.0247326	7.02328	2.34055e-08	0.306551	0.0686754	0.749233	PTPRS
ENSG00000105821	0.506793	0.382097	0.26451	0.18764	4.44122	4.30303e-05	0.00237526	0.0379508	0.144749	DNAJC2
ENSG00000105835	0.415693	0.258543	0.324973	0.309593	5.28606	8.61271e-05	0.0161618	0.00232532	0.00376802	NAMPT
ENSG00000105974	0.241604	0.0427217	0.134643	0.0732017	9.18666	0.00024425	0.516333	0.039977	0.26566	CAV1
ENSG00000106366	1.72571	-0.148551	-0.00219507	-0.0749806	9.73863	2.67668e-157	0.0243228	0.973308	0.254544	SERPINE1
ENSG00000106460	-0.288514	0.0332295	0.198762	0.195134	8.1385	6.02659e-05	0.638557	0.0046241	0.00542954	TMEM106B
ENSG00000106546	-0.443423	0.0410686	0.158592	0.158199	7.08107	2.01485e-08	0.590185	0.0360649	0.0364796	AHR
ENSG00000106591	0.319542	0.304188	0.308291	0.0501231	4.45238	0.0130289	0.0181031	0.0163818	0.706304	MRPL32
ENSG00000106636	0.42396	-0.191289	-0.189316	-0.151867	6.95944	1.3318e-08	0.0135697	0.0144915	0.0492994	YKT6
ENSG00000106714	-0.265007	0.127542	0.223263	0.213204	5.3942	0.0151547	0.221528	0.0303444	0.0389838	CNTNAP3
ENSG00000107551	-0.531199	0.372382	0.31279	-0.00988303	4.96543	0.000110138	0.00214774	0.0103864	0.9381	RASSF4
ENSG00000107984	1.8204	-0.209898	-0.116476	-0.32702	4.8692	1.35852e-82	0.0701403	0.309393	0.00528575	DKK1
ENSG00000108651	0.608177	0.24485	0.222659	0.0745948	5.17535	2.39126e-09	0.0208612	0.0358714	0.489439	UTP6
ENSG00000108654	0.401776	0.26502	0.179567	0.0275483	9.62841	7.42384e-10	5.29765e-05	0.00641363	0.676355	DDX5
ENSG00000108669	-0.383911	-0.1482	-0.143856	-0.28581	4.12044	0.0074276	0.283363	0.29695	0.0422777	CYTH1
ENSG00000108821	-0.52968	0.412834	0.184778	0.236399	5.38525	9.17242e-06	0.000108165	0.0900834	0.0294912	COL1A1
ENSG00000108848	0.0526278	0.438602	0.233238	0.143004	7.92131	0.476023	1.39015e-09	0.0014701	0.0515695	LUC7L3
ENSG00000109046	-0.0346497	0.375887	0.248555	0.166847	7.40567	0.653522	5.53748e-07	0.00104134	0.0282546	WSB1
ENSG00000109452	0.0657733	0.0908129	0.33018	0.166679	6.63277	0.424533	0.272222	4.7138e-05	0.0421498	INPP4B
ENSG00000109610	-0.212538	-0.144747	-0.38099	-0.0465694	6.0933	0.0200128	0.110229	3.99928e-05	0.604079	SOD3
ENSG00000109920	0.252282	0.283763	0.230722	0.0899758	6.5085	0.0030392	0.0008269	0.0067513	0.29652	FNBP4
ENSG00000110108	-0.296967	-0.196089	-0.216422	-0.139545	5.93572	0.00107001	0.0289897	0.0160677	0.117818	TMEM109
ENSG00000110330	0.234888	0.230123	0.161467	0.0689796	6.67658	0.00377093	0.00454847	0.0474502	0.400457	BIRC2
ENSG00000110888	0.451758	0.362428	0.290082	0.154056	7.45828	1.12017e-09	1.15244e-06	0.000105965	0.040973	CAPRIN2
ENSG00000110925	-0.206598	-0.245207	-0.32632	-0.210517	5.44683	0.0338391	0.0119749	0.000905578	0.0301582	CSRNP2
ENSG00000111077	-0.420073	0.345678	0.23546	0.250468	7.75362	4.28528e-08	2.28442e-06	0.00136425	0.000653535	TNS2
ENSG00000111196	0.686894	0.328766	0.324706	0.00365259	4.44251	2.77526e-08	0.0110379	0.0119821	0.978359	MAGOHB
ENSG00000111642	-0.0898294	0.163995	0.138121	0.130104	8.56656	0.194961	0.0166845	0.0440347	0.057824	CHD4
ENSG00000111676	-0.346547	0.153275	0.0602648	0.164519	9.24418	3.01723e-07	0.0207344	0.36511	0.012943	ATN1
ENSG00000111799	0.351917	0.102771	0.139963	0.0801937	9.68845	5.84698e-08	0.113288	0.0314316	0.216319	COL12A1
ENSG00000112245	0.766168	0.112629	0.0900208	0.0899509	6.81156	1.41773e-23	0.158077	0.259515	0.259753	PTP4A1
ENSG00000112658	0.695373	-0.159575	-0.354376	-0.352899	5.94322	2.71594e-17	0.0707607	8.15122e-05	8.69504e-05	SRF
ENSG00000112715	0.0497402	0.369405	0.242819	0.153631	8.68651	0.478833	9.85219e-08	0.000496092	0.0279631	VEGFA
ENSG00000113070	1.47645	-0.146815	-0.286865	-0.0902402	4.47772	2.02381e-40	0.269059	0.0338566	0.493818	HBEGF
ENSG00000113368	-0.320078	0.070615	0.24206	-0.00228721	4.32228	0.0159483	0.57393	0.0480487	0.985668	LMNB1
ENSG00000113810	-0.433076	0.223403	0.205048	0.145418	6.71668	2.26629e-07	0.00488798	0.00984833	0.0683103	SMC4
ENSG00000114019	1.10802	-0.172714	-0.234476	-0.214664	6.83887	1.46903e-50	0.0302407	0.00340026	0.00725399	AMOTL2
ENSG00000114120	0.0129377	0.219061	0.183867	0.158344	6.83315	0.874104	0.00643336	0.0224419	0.0497437	SLC25A36
ENSG00000114268	-0.590533	0.206998	0.277996	0.219281	6.62069	2.49521e-11	0.012357	0.000722239	0.00794285	PFKFB4
ENSG00000114738	-0.182767	-0.186065	-0.0689842	0.000169133	5.90596	0.0460467	0.0420466	0.445681	0.998532	MAPKAPK3
ENSG00000114857	0.380545	0.403536	0.327465	0.123929	7.1282	9.30592e-07	1.86342e-07	2.70788e-05	0.1164	NKTR
ENSG00000115268	-0.0740865	-0.166416	-0.192899	-0.0565312	6.9367	0.341687	0.033811	0.0140153	0.467143	RPS15
ENSG00000115414	0.264382	0.0559839	0.134559	0.0829549	14.5871	2.35732e-05	0.370662	0.03212	0.184517	FN1
ENSG00000115520	0.325872	-0.171987	-0.220762	-0.254637	4.70643	0.0028628	0.137852	0.0581361	0.0292647	COQ10B
ENSG00000115524	0.10743	0.256936	0.213731	0.0890337	8.84996	0.114071	0.000139333	0.00158197	0.189412	SF3B1
ENSG00000115641	0.957599	-0.0223623	-0.182397	-0.0536563	7.52162	5.9509e-42	0.76161	0.0142359	0.467311	FHL2
ENSG00000115648	0.128045	0.312737	0.277317	0.183397	7.35073	0.105043	6.55787e-05	0.000405435	0.0201471	MLPH
ENSG00000115875	0.523874	0.241171	0.110868	0.112295	6.50833	2.1289e-10	0.00418526	0.192392	0.186699	SRSF7
ENSG00000115884	-0.341043	-0.12436	-0.282673	-0.0108693	6.50356	5.71007e-05	0.134117	0.000757899	0.894791	SDC1
ENSG00000116001	-0.187421	0.315631	0.228243	0.0615754	6.98679	0.0236279	7.44862e-05	0.00439681	0.447723	TIA1
ENSG00000116132	-0.45744	0.212423	0.28462	0.255718	6.60129	1.3997e-07	0.0099432	0.000506083	0.00182573	PRRX1
ENSG00000116285	1.07771	0.113671	0.32272	0.106869	8.01492	1.46984e-55	0.109232	4.42697e-06	0.132105	ERRFI1
ENSG00000116560	0.0471098	0.218071	0.251626	0.0451613	7.93138	0.50754	0.00196549	0.000360628	0.525201	SFPQ
ENSG00000116685	-0.277847	-0.106506	-0.216897	-0.187834	6.27678	0.00128012	0.209716	0.0114268	0.0279526	KIAA2013
ENSG00000116754	0.15204	0.272009	0.210488	0.0428932	8.00595	0.0340459	0.000136134	0.00328523	0.55193	SRSF11
ENSG00000117151	0.108371	0.186552	0.18281	0.18456	6.14786	0.236781	0.0399687	0.04429	0.0422621	CTBS
ENSG00000117152	0.690894	0.0850243	0.163585	0.0835785	8.84747	3.79033e-25	0.209737	0.0154824	0.217506	RGS4
ENSG00000117308	0.144745	0.260419	0.217867	0.178798	6.30746	0.103479	0.00320487	0.0138428	0.0444813	GALE
ENSG00000117318	-0.485924	-0.0989457	-0.143036	0.02089	7.9755	9.91649e-12	0.157448	0.0413157	0.764081	ID3
ENSG00000117523	0.428976	0.106457	0.213948	0.0925973	7.50895	2.97981e-09	0.147954	0.00346585	0.208401	PRRC2C
ENSG00000117525	2.17827	-0.0505335	-0.0249833	-0.260297	7.97698	4.32395e-217	0.486641	0.730332	0.000399258	F3
ENSG00000117625	-0.339685	0.189515	0.286654	0.0334052	5.73287	0.000901921	0.0495734	0.00269183	0.733362	RCOR3
ENSG00000117724	-0.0128636	0.235066	0.318967	0.14553	5.03875	0.907821	0.0296034	0.00277582	0.18196	CENPF
ENSG00000117984	-0.173164	0.0046537	-0.087166	0.0197701	12.5715	0.00615661	0.941042	0.166362	0.753127	CTSD
ENSG00000118263	0.962816	-0.255695	-0.0660026	-0.0533618	5.74759	4.5316e-28	0.00941032	0.493239	0.579104	KLF7
ENSG00000118473	0.476797	0.334288	0.269139	0.0746181	5.39561	9.36151e-06	0.00223669	0.0143849	0.508021	SGIP1
ENSG00000118495	0.760657	0.277577	0.387688	0.286018	4.97144	4.44037e-13	0.0123934	0.000394961	0.00980987	PLAGL1
ENSG00000118523	1.72558	-0.264339	-0.305078	-0.55784	7.91616	1.89311e-141	0.000252161	2.46407e-05	3.32394e-14	CTGF
ENSG00000118922	0.302751	0.10295	0.151525	0.103514	6.06377	0.00057491	0.250071	0.0884341	0.246648	KLF12
ENSG00000119682	0.117194	-0.219102	-0.166392	-0.170643	6.46398	0.143059	0.00761548	0.0416725	0.0367984	AREL1
ENSG00000119707	0.347034	0.248003	0.177683	0.0871434	7.56268	1.89386e-06	0.000709995	0.0158799	0.23835	RBM25
ENSG00000119927	-1.07993	-0.0110662	0.168308	0.0178522	8.29147	1.4113e-46	0.875558	0.0163543	0.800288	GPAM
ENSG00000120129	1.29108	-0.428064	-0.348124	-0.22148	5.2357	3.32686e-44	0.000107548	0.0014275	0.039151	DUSP1
ENSG00000120159	0.652728	0.244721	0.296167	0.339486	4.56577	2.57041e-08	0.0468759	0.0153709	0.00521362	CAAP1
ENSG00000120738	1.79708	0.960029	0.865199	-0.255663	6.26844	1.99897e-92	2.94414e-25	1.38925e-20	0.0131058	EGR1
ENSG00000120875	-0.961123	0.13573	0.139043	0.278354	8.07526	1.03248e-35	0.058606	0.0525591	9.33246e-05	DUSP4
ENSG00000120889	0.197111	0.100399	0.128571	0.14242	7.62179	0.00719296	0.173129	0.0804964	0.0526803	TNFRSF10B
ENSG00000120942	0.258565	-0.290456	-0.193994	-0.321104	4.43679	0.0252884	0.0191227	0.112365	0.00980304	UBIAD1
ENSG00000121039	2.03823	-0.247355	0.0724318	-0.084141	6.01627	9.08545e-144	0.00864623	0.426534	0.363168	RDH10
ENSG00000122566	0.139059	0.188108	0.177753	0.0788086	9.2455	0.0360826	0.00443698	0.0072444	0.235279	HNRNPA2B1
ENSG00000122641	1.46483	0.0977428	0.247453	0.142348	7.96054	6.27764e-96	0.185796	0.000731976	0.0528278	INHBA
ENSG00000122861	0.827497	0.0804462	0.208687	0.0875538	8.03619	1.07677e-31	0.265857	0.00363504	0.225629	PLAU
ENSG00000122873	0.20921	0.469754	-0.0139087	0.108372	4.05389	0.147054	0.000713666	0.925365	0.457714	CISD1
ENSG00000123143	-0.234273	-0.00838371	-0.177811	-0.0918878	7.14388	0.00318766	0.914488	0.0244293	0.241854	PKN1
ENSG00000123416	-1.84495	-0.758579	0.525526	0.540035	6.268	1.59862e-69	1.52879e-16	1.27856e-10	3.87679e-11	TUBA1B
ENSG00000123933	-0.37475	-0.0487564	-0.13802	-0.0623303	7.17652	8.23087e-07	0.512197	0.0648523	0.402155	MXD4
ENSG00000123989	0.0153562	-0.13252	-0.240274	-0.127681	9.19404	0.816257	0.0461483	0.000306568	0.0542444	CHPF
ENSG00000124120	0.347665	-0.219597	-0.172537	-0.24505	5.02663	0.000479869	0.0379174	0.101018	0.0209395	TTPAL
ENSG00000124151	-0.323024	-0.194609	-0.180445	-0.101881	6.27659	0.000196612	0.0231456	0.0347643	0.230184	NCOA3
ENSG00000124222	0.0900013	0.378521	0.256942	0.173926	6.63034	0.296989	7.14008e-06	0.0024962	0.0420832	STX16
ENSG00000124225	-1.2866	-0.0665462	-0.249366	0.0284424	6.0401	2.85358e-36	0.457034	0.00619405	0.74874	PMEPA1
ENSG00000125347	-0.265828	-0.201892	-0.267621	-0.216631	5.17398	0.0138874	0.0592685	0.0130633	0.0431697	IRF1
ENSG00000125378	0.500276	-0.509016	-0.260318	-0.325831	4.17671	1.37423e-05	9.56619e-05	0.0383427	0.0105086	BMP4
ENSG00000125520	-0.313021	-0.0175835	-0.246802	-0.134323	6.24077	0.000437191	0.83893	0.00521305	0.124208	SLC2A4RG
ENSG00000125538	0.688964	0.0860016	0.34256	0.312927	7.50378	1.10621e-19	0.275456	9.98296e-06	5.59674e-05	IL1B
ENSG00000125676	0.16776	0.206672	0.180068	0.198009	6.02709	0.0671564	0.0236105	0.0488686	0.030052	THOC2
ENSG00000125772	-0.550579	0.269141	0.263145	0.0582239	5.77752	1.04693e-07	0.00449982	0.00541003	0.547091	GPCPD1
ENSG00000125968	-0.341377	-0.0181491	-0.193722	-0.00986413	7.42072	5.10324e-06	0.80487	0.00900693	0.893069	ID1
ENSG00000125977	0.0418453	-0.348292	-0.260804	-0.198189	5.34506	0.667503	0.000611264	0.00951363	0.0471104	EIF2S2
ENSG00000126464	-0.513928	-0.190224	-0.173476	-0.0480189	6.05462	1.49817e-08	0.0303012	0.0477007	0.579282	PRR12
ENSG00000126653	0.234583	0.119344	0.202183	0.0462198	5.29047	0.0226973	0.25173	0.0499457	0.659904	NSRP1
ENSG00000126705	-0.542581	-0.200445	-0.0970944	-0.0966491	6.55361	1.62166e-10	0.0149851	0.234443	0.236803	AHDC1
ENSG00000126903	-0.0266864	-0.283197	-0.161312	-0.199056	5.84027	0.762348	0.00170713	0.0706689	0.0260304	SLC10A3
ENSG00000127329	0.973331	0.0192402	0.256802	0.220972	6.48106	1.99751e-34	0.821857	0.00214577	0.00845464	PTPRB
ENSG00000127445	-0.145961	-0.187914	-0.319462	-0.199219	5.83451	0.111311	0.0410593	0.000605246	0.0303539	PIN1
ENSG00000127589	-1.94028	-0.618546	0.667282	0.668151	6.05744	2.70357e-62	3.2734e-10	1.39087e-14	1.31295e-14	NA
ENSG00000127603	0.21199	0.213837	0.20366	0.230326	8.65735	0.00172363	0.0015327	0.00257643	0.000635643	MACF1
ENSG00000127824	-2.19646	-0.512873	1.0722	0.898549	5.25871	2.55577e-38	0.000100701	6.32153e-23	4.53169e-16	TUBA4A
ENSG00000129128	0.435466	0.0734504	0.203207	0.0744762	7.16275	5.27019e-09	0.334699	0.00711671	0.327688	SPCS3
ENSG00000129245	0.233192	-0.265001	-0.271576	-0.182591	6.02075	0.00694058	0.00335035	0.00263021	0.0414746	FXR2
ENSG00000130147	0.474453	-0.210112	-0.175327	-0.165776	7.08553	1.51105e-10	0.00651079	0.0227724	0.0311949	SH3BP4
ENSG00000130164	-0.34821	-0.0165039	0.154983	0.180362	6.05285	0.000143158	0.85284	0.0772076	0.0390888	LDLR
ENSG00000130312	-0.47101	-0.336025	-0.293584	-0.231855	4.37519	0.000443955	0.0103459	0.0243886	0.0727627	MRPL34
ENSG00000130479	0.0807594	-0.0314811	-0.318545	0.0290595	5.07235	0.442737	0.767495	0.00384689	0.783108	MAP1S
ENSG00000130706	-0.0164287	-0.20036	-0.337334	-0.210937	5.60948	0.858488	0.0326363	0.000386701	0.0245308	ADRM1
ENSG00000130821	-0.177442	-0.197992	-0.14789	-0.0384044	6.098	0.0449476	0.0254377	0.0931995	0.659636	SLC6A8
ENSG00000131016	0.903218	0.130119	0.183946	0.20468	8.49629	3.2412e-40	0.0612124	0.00797298	0.00313168	AKAP12
ENSG00000131051	0.178146	0.317357	0.242629	0.0692269	7.94881	0.0128161	8.15317e-06	0.000683312	0.336108	RBM39
ENSG00000131080	-0.345056	0.224819	0.126665	0.304852	4.45747	0.0147032	0.0840931	0.336614	0.0177596	EDA2R
ENSG00000131462	-0.907583	-0.185997	0.230279	0.360251	4.90474	2.30545e-13	0.0976381	0.0308728	0.000606674	TUBG1
ENSG00000131467	0.107813	-0.170634	-0.181777	-0.0936605	6.71556	0.162921	0.0303492	0.0210466	0.231776	PSME3
ENSG00000131773	-0.521833	0.257087	0.376422	0.341368	5.64282	1.1087e-06	0.00875733	0.000103623	0.000450206	KHDRBS3
ENSG00000132000	-0.290475	-0.15051	-0.309505	0.00396298	5.05598	0.0110591	0.180739	0.00690775	0.971408	PODNL1
ENSG00000132274	-0.416476	0.274998	0.252047	0.0438974	6.09025	1.34141e-05	0.0020059	0.0046949	0.629392	TRIM22
ENSG00000132300	0.265051	0.251763	0.202424	0.118919	5.88359	0.00419682	0.00658616	0.029546	0.204646	PTCD3
ENSG00000132424	0.0236156	0.399369	0.339803	0.114129	7.91715	0.750656	4.29292e-08	3.5874e-06	0.122784	PNISR
ENSG00000132463	0.167017	0.10966	0.115897	0.0866499	7.00023	0.0315816	0.159567	0.136765	0.266886	GRSF1
ENSG00000132485	0.306676	0.276857	0.177561	0.0747846	7.10658	7.86819e-05	0.000374784	0.0233834	0.342754	ZRANB2
ENSG00000132680	0.308489	0.137146	0.214269	0.00862065	5.93049	0.000894414	0.146249	0.0220128	0.928051	KIAA0907
ENSG00000133216	-0.626783	-0.264803	-0.151258	-0.0409958	5.20897	6.31514e-09	0.0102128	0.136686	0.682988	EPHB2
ENSG00000133243	-0.37796	-0.151439	-0.134888	0.033903	7.28016	1.0382e-06	0.0465714	0.0755634	0.651707	BTBD2
ENSG00000133466	-0.205559	0.462792	0.318082	0.377323	4.56464	0.172976	0.000724625	0.022602	0.00642287	C1QTNF6
ENSG00000133597	-0.138614	-0.245271	-0.273653	-0.287118	4.64882	0.250299	0.0441942	0.0253176	0.018923	ADCK2
ENSG00000133816	0.798356	-0.0458781	-0.13062	-0.0868854	6.90462	8.94596e-27	0.558423	0.0974888	0.268781	MICAL2
ENSG00000133858	0.510154	0.267671	0.248707	0.110058	6.27185	3.24096e-09	0.00234791	0.00470835	0.216827	ZFC3H1
ENSG00000134186	0.307511	0.188171	0.201768	0.0650252	5.91208	0.000767151	0.0416629	0.0285911	0.486286	PRPF38B
ENSG00000134318	0.173615	0.229208	0.167069	0.185352	6.25474	0.0437461	0.0074447	0.0521396	0.0309521	ROCK2
ENSG00000134531	0.242897	0.057689	0.144586	0.163897	8.12602	0.000470729	0.409522	0.0378827	0.0185784	EMP1
ENSG00000134698	0.280534	0.230676	0.167207	0.26181	5.04088	0.0118306	0.0392147	0.136978	0.0187394	AGO4
ENSG00000134769	-1.29414	0.351599	0.217873	0.26872	5.29847	7.83859e-22	0.00124302	0.0482741	0.0143659	DTNA
ENSG00000135046	-0.285993	0.183332	0.121149	0.166559	9.22038	2.15312e-05	0.00548516	0.0667502	0.011659	ANXA1
ENSG00000135164	0.331012	0.340298	0.313595	0.149282	6.24181	0.00019178	0.000123396	0.000410242	0.0975219	DMTF1
ENSG00000135272	-0.379783	0.169281	0.141294	0.17136	6.60312	8.70872e-06	0.0382592	0.0842818	0.0358616	MDFIC
ENSG00000136213	-0.437724	-0.0857811	-0.248858	-0.29557	4.92245	0.000128173	0.431868	0.0252807	0.00825193	CHST12
ENSG00000136270	0.198519	-0.115851	-0.230182	-0.202172	5.41242	0.0382196	0.24141	0.0214784	0.0427613	TBRG4
ENSG00000136319	-0.408945	-0.509191	-0.0959036	-0.134539	4.44012	0.00132931	7.84699e-05	0.430758	0.271425	TTC5
ENSG00000136536	0.116534	0.277715	0.21223	0.057484	6.97377	0.141487	0.000393339	0.00696001	0.469515	2019-03-07
ENSG00000136718	0.526884	-0.265761	-0.270527	-0.2633	5.07412	8.62453e-08	0.0134311	0.0117906	0.0140502	IMP4
ENSG00000137497	-0.531557	0.149287	0.0426153	0.152362	8.12253	3.14228e-13	0.0335095	0.546127	0.0298976	NUMA1
ENSG00000137776	-0.111763	0.254324	0.190874	0.196478	6.46733	0.19568	0.00238663	0.0232528	0.0194697	SLTM
ENSG00000137801	0.477474	-0.154625	-0.0647633	-0.176627	10.4373	1.05349e-13	0.0157866	0.311039	0.00588614	THBS1
ENSG00000137807	0.560707	0.0968959	0.358039	-0.0553379	4.35905	4.08144e-06	0.453839	0.00403767	0.675071	KIF23
ENSG00000137818	-0.142851	-0.144392	-0.149325	-0.0360182	9.10431	0.0318474	0.0301023	0.0248045	0.587097	RPLP1
ENSG00000137831	0.166619	0.183722	0.189844	0.0566066	8.43438	0.0152517	0.00725978	0.00552315	0.410395	UACA
ENSG00000137834	-0.212125	-0.0371268	-0.268591	0.085077	5.03997	0.0462153	0.721388	0.0121034	0.407514	SMAD6
ENSG00000137942	-0.472095	0.115436	0.173288	0.0886817	6.5422	3.99021e-08	0.157576	0.0329681	0.278297	FNBP1L
ENSG00000137959	-0.54065	0.379427	0.615383	0.322048	4.74817	0.000428693	0.00486648	2.36658e-06	0.0174139	IFI44L
ENSG00000138061	-0.770443	-0.164647	-0.105021	-0.0999534	7.89402	4.0369e-26	0.0196278	0.13538	0.155203	CYP1B1
ENSG00000138182	-0.11461	0.0978861	0.238737	-0.0462642	4.72757	0.342249	0.403645	0.0376986	0.698095	KIF20B
ENSG00000138193	-0.276751	0.123933	0.0914565	0.0370055	5.75489	0.00706049	0.205623	0.351621	0.707892	PLCE1
ENSG00000138463	-0.641239	-0.48574	-0.405106	-0.214614	4.21691	5.70335e-06	0.000422003	0.00287875	0.104898	DIRC2
ENSG00000138668	0.156492	0.209343	0.19712	0.0726001	7.4686	0.034166	0.0044315	0.00738518	0.327298	HNRNPD
ENSG00000138675	0.95919	0.063071	0.186639	0.142158	6.65564	5.31831e-35	0.443309	0.0219282	0.0817879	FGF5
ENSG00000139131	0.0138308	-0.229902	-0.292808	-0.264326	4.83956	0.898544	0.0392646	0.00909486	0.0181329	YARS2
ENSG00000139514	1.18295	-0.218436	-0.0931236	-0.20287	5.89002	2.73835e-47	0.0175664	0.304672	0.0269876	SLC7A1
ENSG00000139625	-0.209216	0.385156	0.218039	0.182826	6.93074	0.0145197	2.31491e-06	0.00820715	0.0271297	MAP3K12
ENSG00000139668	-0.328309	0.199177	0.19903	0.282504	5.55287	0.00191131	0.0453537	0.0452195	0.00417606	WDFY2
ENSG00000139734	0.876884	-0.0875615	0.178168	0.0107651	4.21898	8.22563e-13	0.530024	0.184121	0.937546	DIAPH3
ENSG00000139746	0.261769	0.230043	0.281226	0.126585	6.3334	0.0021271	0.00706184	0.00093404	0.141442	RBM26
ENSG00000140326	-0.153984	-0.211837	-0.268306	-0.294058	4.2672	0.242438	0.10995	0.0443316	0.0281156	CDAN1
ENSG00000140332	-0.195855	-0.151775	-0.16646	-0.110071	6.92518	0.0116642	0.0500279	0.0317253	0.153952	TLE3
ENSG00000140400	0.177521	0.138068	0.18922	0.0994787	6.44504	0.036526	0.105073	0.0254739	0.243943	MAN2C1
ENSG00000140416	0.619546	0.150793	0.128755	0.00228468	9.46289	1.60042e-21	0.021056	0.0491062	0.972251	TPM1
ENSG00000140497	0.0028066	-0.243538	-0.169631	-0.152772	6.37876	0.97264	0.00352653	0.0406487	0.0649606	SCAMP2
ENSG00000140521	0.314227	-0.213377	-0.115442	-0.125547	5.9671	0.000305769	0.0196709	0.202153	0.165835	POLG
ENSG00000140682	0.633378	0.257451	0.0465068	0.114574	6.58042	2.71912e-15	0.00175805	0.578027	0.168268	TGFB1I1
ENSG00000141469	-0.926961	0.21676	0.545765	0.379383	5.62891	1.01698e-12	0.0554338	5.4245e-07	0.000631437	SLC14A1
ENSG00000141582	-0.439674	-0.24899	-0.183448	-0.116192	4.63964	0.000357521	0.0376525	0.12205	0.322946	CBX4
ENSG00000141873	-0.177278	-0.183119	-0.277966	-0.254356	4.31715	0.15214	0.138128	0.0260847	0.0413118	SLC39A3
ENSG00000142279	0.331843	-0.340422	-0.333997	-0.23537	4.32273	0.00448921	0.00767517	0.00876731	0.061076	WTIP
ENSG00000142327	-0.0753875	-0.1658	-0.140658	-0.181142	6.64553	0.349594	0.0409414	0.0820633	0.0256192	NA
ENSG00000142871	2.28208	0.277398	-0.1327	-0.536251	8.34802	3.29706e-245	8.49272e-05	0.0640895	2.46483e-13	CYR61
ENSG00000143248	0.426791	-0.254252	0.0783445	-0.0303667	4.64881	7.09172e-05	0.029495	0.482795	0.788505	RGS5
ENSG00000143772	-1.72074	-0.050744	-0.299916	0.0447768	5.09063	2.09784e-35	0.644445	0.00809155	0.680206	ITPKB
ENSG00000143850	-0.458617	0.317269	0.412671	0.188676	4.56803	0.00150552	0.0140111	0.00119997	0.150623	PLEKHA6
ENSG00000143878	0.214154	-0.0142011	-0.252203	-0.172407	6.26516	0.0102464	0.867298	0.0036459	0.0452725	RHOB
ENSG00000144381	0.317967	0.119483	0.0404723	0.0752459	6.96774	3.64413e-05	0.125596	0.605805	0.335939	HSPD1
ENSG00000144711	-0.0942606	-0.234976	-0.328952	0.0484173	5.40172	0.352325	0.0223931	0.00155084	0.626603	IQSEC1
ENSG00000144730	-1.34131	-0.136373	-0.325239	0.00818547	6.109	5.45765e-35	0.146166	0.000678973	0.92934	IL17RD
ENSG00000144857	-0.283812	0.186467	0.20139	0.221634	6.11466	0.0031931	0.0423054	0.0278991	0.0154417	BOC
ENSG00000145029	0.0815771	0.447796	0.31941	0.256839	4.56406	0.543466	0.000458284	0.013779	0.0496334	NICN1
ENSG00000145246	1.17808	0.0219344	0.160018	0.0802306	6.72724	6.92418e-54	0.788496	0.0478414	0.32418	ATP10D
ENSG00000145358	-1.05831	0.202638	0.35678	0.328909	6.42558	6.70329e-25	0.0242123	5.71925e-05	0.000213083	DDIT4L
ENSG00000145476	-0.309215	0.226671	0.281044	0.159017	4.35489	0.0458845	0.112645	0.0470745	0.269383	CYP4V2
ENSG00000145545	0.299247	-0.0735229	0.0216547	0.0398894	4.52075	0.0114157	0.553216	0.859365	0.743593	SRD5A1
ENSG00000145555	0.533344	0.0668224	0.161256	0.103507	6.96287	1.66869e-12	0.390581	0.0369034	0.182113	MYO10
ENSG00000145685	-0.467663	0.215558	0.257923	0.140523	6.55731	1.22799e-07	0.00952523	0.0018415	0.0927758	LHFPL2
ENSG00000145833	0.13826	0.197205	0.22468	0.127839	6.30204	0.106444	0.0206781	0.00816545	0.135706	DDX46
ENSG00000146281	0.308333	-0.007549	0.263247	0.0485817	5.01228	0.00502145	0.947189	0.0169758	0.667926	PM20D2
ENSG00000146282	0.204878	0.222901	0.134526	0.0575995	5.47818	0.0400564	0.0249689	0.180017	0.569077	RARS2
ENSG00000147162	0.190431	0.344353	0.258659	0.105902	8.64374	0.00571434	4.8731e-07	0.000177919	0.125532	OGT
ENSG00000147274	-0.279102	0.170941	0.191886	0.0300148	6.85767	0.00086192	0.0342575	0.0172344	0.712869	RBMX
ENSG00000147459	0.719969	0.182158	0.16189	0.217815	6.21653	7.83578e-18	0.0371351	0.06436	0.0123472	DOCK5
ENSG00000147883	-0.487603	0.00468615	0.194647	0.246746	7.05794	4.35387e-09	0.953183	0.013361	0.00165328	CDKN2B
ENSG00000148154	1.42518	-0.204151	0.0379696	-0.19106	7.84574	3.79102e-94	0.00522479	0.598047	0.00887175	UGCG
ENSG00000148396	0.397314	-0.0831404	-0.150948	-0.166646	7.07016	8.57134e-08	0.276544	0.049357	0.0300475	SEC16A
ENSG00000148634	0.619799	0.0872756	0.154679	0.104191	7.44171	2.76391e-17	0.246083	0.0389289	0.165548	HERC4
ENSG00000148677	2.42466	-0.278705	-0.317949	-0.479695	5.87878	1.09537e-195	0.00435468	0.00118906	1.513e-06	ANKRD1
ENSG00000148773	0.069757	-0.0836615	0.467885	-0.00757289	6.07536	0.432415	0.354789	4.61861e-08	0.932568	MKI67
ENSG00000148985	-0.319506	-0.00869658	-0.336378	0.059645	4.13682	0.0358978	0.952135	0.0271396	0.67804	PGAP2
ENSG00000149289	0.302115	0.198065	0.435245	0.335116	4.88456	0.00836624	0.0873611	0.000107861	0.00323233	ZC3H12C
ENSG00000149591	1.73965	0.0998347	0.182777	-0.0190695	6.90822	8.0065e-120	0.219123	0.0234563	0.815802	TAGLN
ENSG00000150995	-0.442816	0.0292194	0.220172	0.109364	5.83437	1.23799e-05	0.760275	0.0189671	0.249701	ITPR1
ENSG00000151012	-0.193184	0.0526994	0.203621	0.0669223	7.35131	0.0100382	0.475415	0.00542309	0.364165	SLC7A11
ENSG00000151474	0.304999	0.0702142	0.244227	0.150799	6.5392	0.000195893	0.399659	0.00294781	0.06843	FRMD4A
ENSG00000151612	-0.125658	0.250465	0.19975	0.229533	5.7833	0.201227	0.00819362	0.0354968	0.0154299	ZNF827
ENSG00000151702	0.333629	0.159559	0.235371	0.166567	5.12397	0.0018995	0.145415	0.0302288	0.127731	FLI1
ENSG00000151789	-1.02963	0.00566706	0.213105	0.283985	5.24968	2.51481e-16	0.959124	0.0477181	0.00786895	ZNF385D
ENSG00000151914	0.0188026	0.353413	0.329339	0.228414	9.09101	0.77948	9.74096e-08	7.03231e-07	0.000597285	DST
ENSG00000152784	-0.26311	0.224084	0.227966	0.294452	5.60763	0.0121332	0.0238465	0.021457	0.00276858	PRDM8
ENSG00000152795	0.161087	0.326145	0.207783	0.069541	8.02871	0.024119	4.14423e-06	0.00351183	0.331826	HNRNPDL
ENSG00000152894	-0.15735	0.0356856	0.116856	0.218123	6.98372	0.0450148	0.644788	0.128812	0.00432454	PTPRK
ENSG00000153094	-1.67227	0.296352	0.226819	0.10365	4.47016	9.63032e-21	0.0253039	0.0895257	0.446048	BCL2L11
ENSG00000153187	0.183308	0.173103	0.082201	0.0514206	8.34009	0.00783171	0.0119797	0.234359	0.457289	HNRNPU
ENSG00000153201	0.468038	0.113823	0.156332	0.122248	6.66358	3.73397e-09	0.162355	0.0540537	0.13295	RANBP2
ENSG00000153246	-0.155282	0.0564449	0.258018	0.0629636	6.27496	0.0878688	0.527533	0.00326711	0.479881	PLA2R1
ENSG00000153317	0.433507	-0.0101995	0.194793	0.0596404	7.39686	3.13246e-09	0.891863	0.00854371	0.424426	ASAP1
ENSG00000153395	-0.175768	-0.115798	-0.18704	-0.203644	6.78421	0.0330745	0.15829	0.0233866	0.0136938	LPCAT1
ENSG00000153558	-0.207685	0.236943	0.278518	0.241379	5.37837	0.0615195	0.0244848	0.00792122	0.0217253	FBXL2
ENSG00000153904	1.42759	-0.106111	-9.38306e-05	-0.081003	6.77453	1.70271e-84	0.18331	0.999028	0.30848	DDAH1
ENSG00000153956	0.0330557	0.0738337	0.152275	0.0832916	8.63928	0.624639	0.272121	0.0230639	0.21537	CACNA2D1
ENSG00000154678	1.09376	0.0392773	0.200219	0.089091	6.7787	7.85964e-48	0.622739	0.0110895	0.262401	PDE1C
ENSG00000156011	-0.501841	0.121604	0.248042	0.202524	8.15147	6.63979e-12	0.0860688	0.00042516	0.00410123	PSD3
ENSG00000157240	-1.36555	0.0774365	0.166654	0.234008	8.15079	2.14668e-67	0.277263	0.0188009	0.000933977	FZD1
ENSG00000157827	-0.554932	0.382823	0.265678	0.254303	7.41452	7.24961e-12	4.30015e-07	0.000490546	0.000857572	FMNL2
ENSG00000158286	0.170672	0.383935	0.398273	0.0370472	4.13522	0.242219	0.00670115	0.00470771	0.802689	RNF207
ENSG00000159111	-0.22182	-0.286538	-0.126519	-0.145255	5.50854	0.0305388	0.00546896	0.211052	0.151878	MRPL10
ENSG00000159433	-0.310448	0.250792	0.356098	0.0273229	4.73916	0.0216696	0.0447121	0.00377947	0.831594	STARD9
ENSG00000159840	1.01269	-0.0028697	-0.013122	0.00749414	8.6741	1.06458e-52	0.966219	0.846463	0.911901	ZYX
ENSG00000160325	-0.536935	-0.266816	-0.523249	-0.0594931	4.10614	0.00046812	0.0692474	0.000592408	0.676072	CACFD1
ENSG00000160410	-0.200138	-0.130961	-0.23526	-0.214276	5.95795	0.026223	0.142783	0.00912583	0.0173204	SHKBP1
ENSG00000160785	0.172843	-0.237999	-0.26774	-0.240336	5.22402	0.0760615	0.019212	0.00867522	0.0180876	SLC25A44
ENSG00000160932	-0.257449	-0.137305	-0.186502	-0.278615	4.97883	0.0220006	0.213975	0.0935701	0.0131962	LY6E
ENSG00000162076	-0.230184	-0.21394	-0.335564	-0.235263	4.75705	0.0515804	0.0689223	0.00498389	0.0460367	FLYWCH2
ENSG00000162413	-0.374042	-0.205056	-0.175533	-0.0850983	6.49431	1.0858e-05	0.014276	0.0353733	0.303855	KLHL21
ENSG00000162601	0.379562	0.263679	0.348665	0.0635607	5.53565	0.000155472	0.00942246	0.000524711	0.539332	MYSM1
ENSG00000162664	-0.0365273	0.288222	0.211808	0.093753	5.52641	0.713052	0.00265207	0.028268	0.337455	ZNF326
ENSG00000162704	0.415719	-0.0228214	-0.0155313	-0.0643389	7.59871	4.53912e-09	0.752376	0.829828	0.374602	ARPC5
ENSG00000162729	0.0556749	-0.170837	-0.221959	-0.0432216	5.89072	0.544725	0.068575	0.0186519	0.641127	IGSF8
ENSG00000163399	-0.156654	0.0718662	0.16569	0.163202	9.83631	0.0170463	0.270136	0.0107871	0.0120583	ATP1A1
ENSG00000163482	-0.0209737	0.352839	0.222127	0.0424059	6.18961	0.826084	0.000125011	0.0168884	0.654224	STK36
ENSG00000163516	-0.127438	0.249988	0.227553	0.108071	6.35104	0.152224	0.00365513	0.00821889	0.214127	ANKZF1
ENSG00000163629	-0.354146	0.192021	0.107319	0.208014	6.03036	0.000161648	0.0305486	0.229764	0.0189218	PTPN13
ENSG00000163660	0.612339	0.387564	0.296413	0.204909	6.4264	3.18014e-13	5.8469e-06	0.000574142	0.0181742	CCNL1
ENSG00000163661	1.72823	0.105187	0.292502	0.167273	5.86984	1.23208e-92	0.273168	0.00189015	0.0792745	PTX3
ENSG00000163697	0.999765	0.025623	0.171028	0.0473499	6.6746	6.50036e-39	0.753661	0.0339982	0.561008	APBB2
ENSG00000163702	-0.31337	0.0414634	-0.241164	0.0687553	5.73335	0.00169008	0.665777	0.0146317	0.472178	IL17RC
ENSG00000163714	0.176071	0.172092	0.158267	-0.0159596	6.86003	0.0282062	0.0319687	0.0486228	0.844406	U2SURP
ENSG00000163728	0.256471	0.264202	0.352409	0.131955	6.07083	0.00481756	0.00363132	9.09018e-05	0.151042	TTC14
ENSG00000163762	-0.565805	0.257948	0.36363	0.30766	5.93796	6.27702e-08	0.00707063	0.000121841	0.00123205	TM4SF18
ENSG00000163933	0.316625	0.327972	0.150711	0.267549	4.2955	0.014269	0.0108458	0.252786	0.039051	RFT1
ENSG00000163945	0.297386	0.477951	0.304156	0.332747	4.19297	0.03626	0.000553143	0.0313006	0.0183108	UVSSA
ENSG00000164039	-0.0871603	0.496584	0.375791	0.299059	4.10897	0.591376	0.000840512	0.0128877	0.0503673	BDH2
ENSG00000164171	0.20197	0.0654508	0.217814	0.192883	7.37944	0.0066563	0.383067	0.00338117	0.00954358	ITGA2
ENSG00000164442	1.15627	-0.106522	0.0741227	-0.0549434	8.17918	4.70699e-65	0.131646	0.289839	0.435584	CITED2
ENSG00000164548	0.192104	0.370847	0.231351	0.176173	6.51097	0.0196973	4.99495e-06	0.0048029	0.0324755	TRA2A
ENSG00000164741	1.35234	-0.278759	-0.13992	-0.224226	6.8851	1.03276e-74	0.000572117	0.0802177	0.00534646	DLC1
ENSG00000164949	-1.49545	0.10695	0.199833	0.122144	5.91734	8.83928e-39	0.258208	0.0328498	0.1955	GEM
ENSG00000164953	-0.175034	0.268003	0.210997	0.0920785	4.66725	0.178324	0.0287777	0.0870936	0.462259	TMEM67
ENSG00000165152	-0.449131	-0.292444	-0.233426	-0.150529	5.82833	3.55236e-06	0.00210293	0.0134462	0.107893	TMEM246
ENSG00000165322	-0.24799	0.240746	0.0941878	0.286389	5.62037	0.0171428	0.0147423	0.346656	0.00351258	ARHGAP12
ENSG00000165494	0.326801	0.307601	0.292036	0.109188	5.96984	0.00040824	0.000887311	0.00161799	0.246718	PCF11
ENSG00000165507	0.388875	0.305575	0.295778	0.228906	4.86399	0.00165721	0.0143407	0.0180006	0.0689718	C10orf10
ENSG00000165525	0.342195	0.164134	0.175545	0.192949	5.57774	0.000402867	0.0954382	0.0738222	0.0490588	NEMF
ENSG00000165655	-0.664393	-0.268835	-0.591034	-0.182913	4.50919	1.04465e-07	0.0228841	1.6114e-06	0.116926	ZNF503
ENSG00000166106	0.117991	-0.347176	-0.291154	-0.218485	4.51198	0.288809	0.00317914	0.0126179	0.0585356	ADAMTS15
ENSG00000166147	0.0921663	0.148992	0.133981	0.0171674	9.69558	0.155964	0.0213111	0.0392248	0.791422	FBN1
ENSG00000166250	0.220159	0.123287	0.167261	0.15502	7.78654	0.00269218	0.0952157	0.0234216	0.0355626	CLMP
ENSG00000166311	-0.183307	-0.21078	-0.134363	-0.0761853	8.12459	0.00993029	0.00307413	0.0580393	0.281205	SMPD1
ENSG00000166348	-0.752286	0.0291428	0.246408	0.19839	5.0437	4.50938e-09	0.80063	0.0281822	0.0788442	USP54
ENSG00000166444	-0.340225	0.245782	0.186173	0.0998818	6.15051	0.0002964	0.00567079	0.0367918	0.266795	ST5
ENSG00000166579	0.591037	-0.107253	-0.193462	-0.269271	5.94867	4.64122e-12	0.237391	0.0343956	0.00348157	NDEL1
ENSG00000166619	-0.0283672	-0.222867	-0.232397	-0.238007	5.64349	0.758201	0.0176028	0.0133078	0.011276	BLCAP
ENSG00000166801	0.210111	0.401209	0.344599	0.115282	5.65679	0.0342878	3.66959e-05	0.0004239	0.249765	FAM111A
ENSG00000166833	0.410903	-0.0270221	0.18927	0.0197598	6.27771	1.09218e-06	0.757169	0.0271675	0.820396	NAV2
ENSG00000166912	0.256454	-0.11453	-0.0523629	-0.253304	5.4124	0.00886664	0.261388	0.604787	0.0143431	MTMR10
ENSG00000166922	1.0098	-0.0143224	0.224337	-0.0294409	5.35534	6.8727e-27	0.890377	0.0268647	0.777179	SCG5
ENSG00000166923	0.995759	-0.0622861	0.137754	0.00999996	8.08317	5.90595e-49	0.373379	0.0468782	0.885948	GREM1
ENSG00000167461	-0.241842	-0.245786	-0.339845	-0.305847	4.57691	0.0392541	0.0359585	0.0041437	0.00952674	RAB8A
ENSG00000167470	0.196703	-0.120028	-0.206878	0.0161335	6.13096	0.0199939	0.167324	0.0181617	0.850842	MIDN
ENSG00000167543	-0.332984	-0.256952	-0.401226	-0.23699	4.84015	0.00460775	0.0269677	0.000690453	0.0405681	TP53I13
ENSG00000167552	-2.55321	-0.603651	0.921906	0.848504	8.37544	2.33194e-202	3.47362e-17	1.11382e-42	2.66549e-36	TUBA1A
ENSG00000167553	-1.81389	-0.723228	0.601198	0.630656	5.13429	5.99625e-44	1.06738e-10	4.14454e-10	4.95971e-11	TUBA1C
ENSG00000167615	0.426077	0.418962	0.209344	0.108139	8.72876	3.87593e-10	7.17039e-10	0.00246244	0.116173	LENG8
ENSG00000167635	0.315487	0.165694	0.051196	-0.0508698	6.66244	7.84082e-05	0.0401131	0.529231	0.535098	ZNF146
ENSG00000167657	0.446818	0.00628692	-0.227295	-0.106301	5.56529	1.56781e-06	0.948509	0.0225504	0.279609	DAPK3
ENSG00000167658	-0.297224	-0.11273	-0.131086	-0.0504233	12.3397	2.68399e-06	0.0741618	0.0376583	0.423762	EEF2
ENSG00000167766	0.200856	0.245885	0.262387	0.0365617	5.8515	0.0381177	0.0106968	0.00631352	0.710078	ZNF83
ENSG00000167778	0.190809	-0.235968	-0.178335	-0.111993	6.47469	0.0179867	0.00463779	0.0314582	0.174402	SPRYD3
ENSG00000167797	0.126636	-0.279419	-0.218353	-0.0691881	5.28513	0.205481	0.00757011	0.0354396	0.497833	CDK2AP2
ENSG00000167978	0.404046	0.400291	0.24118	0.120204	10.0486	4.78018e-10	6.41256e-10	0.000235339	0.0653365	SRRM2
ENSG00000167996	-0.202517	-0.265656	-0.242934	-0.0346187	9.32746	0.00201759	5.5293e-05	0.000216328	0.595469	FTH1
ENSG00000168056	-0.140129	-0.0490874	-0.145627	-0.00778372	11.2013	0.0279139	0.44001	0.0222414	0.902397	LTBP3
ENSG00000168209	-1.90135	-0.254169	-0.0869008	0.218355	5.16267	1.42132e-45	0.0170153	0.404129	0.029939	DDIT4
ENSG00000168769	-0.16059	0.121948	0.299122	0.239697	5.49657	0.115763	0.217113	0.0020142	0.0139599	TET2
ENSG00000168906	0.432266	0.34081	0.126223	0.185065	7.63135	2.56457e-09	2.86266e-06	0.0871617	0.0117205	MAT2A
ENSG00000168994	0.635589	-0.28265	-0.2572	-0.264534	5.00629	3.46341e-10	0.0118911	0.0216576	0.0182311	PXDC1
ENSG00000169105	-0.467956	-0.196822	-0.224395	-0.0711844	5.90035	7.89293e-07	0.0324331	0.0149985	0.433302	CHST14
ENSG00000169432	0.265931	0.131638	0.376794	0.210215	4.64404	0.0313955	0.294805	0.00192382	0.0905146	SCN9A
ENSG00000169504	0.563384	0.0168464	0.128116	0.0565654	9.64202	2.99542e-18	0.796456	0.0489368	0.386142	CLIC4
ENSG00000169908	0.199516	0.145931	0.228262	0.171256	9.21286	0.00303023	0.0298754	0.00065328	0.0107162	TM4SF1
ENSG00000170144	0.236305	0.296203	0.200881	0.108121	6.52569	0.00433857	0.000328985	0.0154799	0.195984	HNRNPA3
ENSG00000170265	-0.229655	-0.369928	-0.209585	-0.193137	5.11691	0.0306797	0.000609598	0.0474418	0.0672001	ZNF282
ENSG00000170315	-0.159546	-0.200896	-0.137866	-0.0792134	7.40782	0.0321361	0.00713936	0.0636389	0.284926	UBB
ENSG00000170485	0.402385	0.205884	0.254993	0.217437	7.4547	5.10629e-08	0.00564638	0.000582976	0.00342834	NPAS2
ENSG00000170540	-0.360587	-0.0823843	-0.262673	-0.0675222	6.89273	5.17187e-06	0.288041	0.000816147	0.382757	ARL6IP1
ENSG00000170581	0.2127	0.359673	0.207092	0.123965	7.42103	0.00581681	2.45679e-06	0.00725547	0.109669	STAT2
ENSG00000170892	-0.296358	-0.0765973	-0.210654	-0.0695805	5.98847	0.00135437	0.396505	0.0213463	0.440472	TSEN34
ENSG00000171150	0.571816	0.149617	0.29468	0.164014	6.36752	5.82546e-12	0.081437	0.000512971	0.0556737	SOCS5
ENSG00000171223	0.249654	-0.0701246	-0.283915	-0.223477	5.2164	0.0106804	0.487644	0.00600158	0.0295682	JUNB
ENSG00000171298	-0.151061	-0.0782564	-0.105634	-0.033935	7.68669	0.0411244	0.288028	0.151908	0.643959	GAA
ENSG00000171425	-0.413615	0.0894481	-0.079187	-0.0070514	5.2655	0.000569279	0.426106	0.489768	0.950486	ZNF581
ENSG00000171823	-0.33488	-0.29746	-0.423808	-0.186799	4.68607	0.0050799	0.0122188	0.00044219	0.110002	FBXL14
ENSG00000172315	0.435379	0.245101	0.118693	0.260017	4.44024	0.000494296	0.0552189	0.360155	0.041246	TP53RK
ENSG00000172915	-0.302805	0.141099	0.158285	0.1756	7.2907	9.4473e-05	0.0619136	0.035718	0.0198016	NBEA
ENSG00000172932	0.33785	0.354779	0.295647	0.135249	5.68963	0.000546612	0.000273521	0.00253228	0.174437	ANKRD13D
ENSG00000173068	0.245692	0.263491	0.314686	0.274086	6.05677	0.00631427	0.00342599	0.000434703	0.00228879	BNC2
ENSG00000173166	1.2846	-0.0496855	0.289617	0.12075	4.62034	1.13385e-33	0.68877	0.0146583	0.318728	RAPH1
ENSG00000173209	0.00729468	0.563139	0.296877	0.171466	6.78082	0.932987	1.11243e-11	0.000452619	0.0448377	AHSA2
ENSG00000173230	0.163366	0.216537	0.144361	0.0441761	7.71683	0.0239427	0.00268746	0.0463366	0.543883	GOLGB1
ENSG00000173402	-0.211504	-0.15842	-0.044202	-0.0317974	8.62073	0.00183139	0.0192757	0.511745	0.636799	DAG1
ENSG00000173442	-0.0813603	0.237825	0.173888	0.0958647	7.27968	0.306205	0.00221162	0.0257967	0.221587	EHBP1L1
ENSG00000173540	0.626955	0.213211	0.112221	0.324026	4.40818	2.51065e-07	0.0956913	0.386971	0.0102034	GMPPB
ENSG00000173559	0.927703	0.296068	0.145979	0.17533	5.56047	3.14536e-22	0.00364485	0.15868	0.0892648	NABP1
ENSG00000173575	-0.190027	0.21641	0.19361	0.0588392	7.46258	0.0133179	0.00381821	0.00973274	0.435732	CHD2
ENSG00000174996	0.351523	-0.0894419	-0.0967545	-0.115705	5.83032	7.35633e-05	0.332598	0.294415	0.210839	KLC2
ENSG00000175455	0.245935	0.494724	0.445352	0.143048	6.71968	0.00429564	4.44449e-09	1.45431e-07	0.099376	CCDC14
ENSG00000175592	0.896114	0.0551676	0.149119	0.223202	6.73991	6.68123e-31	0.500901	0.0670511	0.00580236	FOSL1
ENSG00000175756	0.00733784	-0.125649	-0.315392	-0.0835796	5.63948	0.937204	0.182878	0.00103955	0.373018	AURKAIP1
ENSG00000176014	-0.782901	-0.658862	0.700495	0.572544	7.36652	2.39414e-24	5.10256e-18	3.45216e-23	8.68926e-16	TUBB6
ENSG00000176155	0.192556	0.528511	0.389452	0.27503	5.56904	0.0633623	1.3291e-07	0.000119767	0.00747272	CCDC57
ENSG00000176170	1.03356	-0.210972	-0.338639	-0.158026	4.96759	1.99811e-26	0.0558015	0.00244027	0.148181	SPHK1
ENSG00000176788	-0.22349	0.0343621	-0.257964	-0.0691224	6.56105	0.0071205	0.672328	0.00192828	0.398476	BASP1
ENSG00000177000	-0.299466	0.177686	0.232521	0.184245	5.35348	0.00741805	0.0925263	0.026377	0.0804184	MTHFR
ENSG00000177283	-1.5262	0.0518916	0.158375	0.183822	6.45514	3.34232e-50	0.54625	0.0627491	0.0304284	FZD8
ENSG00000177303	-0.262222	-0.202125	-0.282638	-0.0454331	4.67488	0.0275988	0.0864745	0.0175709	0.69381	CASKIN2
ENSG00000177666	0.219004	0.00820116	-0.143321	-0.000202498	7.83997	0.00199775	0.908869	0.0470566	0.997743	PNPLA2
ENSG00000178719	-0.225169	-0.159381	-0.150925	-0.0534709	7.85278	0.00171382	0.0259481	0.0347695	0.452316	GRINA
ENSG00000178726	-0.72519	0.0525307	0.340856	0.385444	4.52247	2.06417e-06	0.701907	0.0100811	0.00347876	THBD
ENSG00000178904	0.641475	0.205938	0.287181	0.214651	4.92707	3.661e-09	0.0716796	0.0110592	0.0598504	DPY19L3
ENSG00000179094	-0.574659	-0.0908499	-0.297376	-0.0836941	4.18397	0.000148886	0.518941	0.0400926	0.551574	PER1
ENSG00000179526	-0.195107	-0.0682521	-0.257232	-0.167256	5.86582	0.0372416	0.460182	0.00628282	0.0728306	SHARPIN
ENSG00000180801	1.02379	-0.3721	-0.140915	-0.150288	4.89184	1.04929e-24	0.00144512	0.214155	0.185244	ARSJ
ENSG00000180914	2.25035	-0.0959407	0.111346	-0.267322	4.66376	5.14242e-116	0.443065	0.360437	0.0362261	OXTR
ENSG00000181027	0.0534947	-0.300102	-0.272981	-0.205446	5.50123	0.570255	0.00215097	0.00507099	0.0336011	FKRP
ENSG00000181381	-0.242065	0.279575	0.355054	0.307721	4.79202	0.0518872	0.0160645	0.00201183	0.0078154	DDX60L
ENSG00000181588	-0.34603	-0.200563	-0.336194	-0.184816	4.28793	0.0107834	0.130586	0.0128234	0.162075	MEX3D
ENSG00000181827	-0.0771864	0.268804	0.431723	0.264636	5.64061	0.440462	0.00529439	5.17531e-06	0.00600786	RFX7
ENSG00000182612	-0.618046	0.0073979	-0.0522147	0.0326641	5.2578	2.8574e-07	0.946957	0.640066	0.767662	TSPAN10
ENSG00000182796	-0.295257	0.371195	0.256497	0.0937069	4.60776	0.0345725	0.00350676	0.0465959	0.476879	TMEM198B
ENSG00000183010	0.451507	-0.144035	-0.258768	-0.242296	6.05494	1.09341e-07	0.107795	0.00423563	0.00730346	PYCR1
ENSG00000183087	-0.130956	-0.0799673	-0.181515	-0.102994	8.00107	0.0629876	0.254788	0.00999231	0.142257	GAS6
ENSG00000183111	-0.860723	0.275503	0.182754	0.240093	4.52075	3.80047e-09	0.027054	0.146522	0.0548716	ARHGEF37
ENSG00000183688	1.5658	-0.222777	-0.0318355	-0.186619	5.25807	1.27493e-64	0.0399482	0.764565	0.0839163	RFLNB
ENSG00000183856	0.49272	-0.130575	0.290823	-0.177599	4.02135	0.000334887	0.384869	0.0392341	0.240928	IQGAP3
ENSG00000184009	0.614036	-0.0499469	-0.132391	-0.0771844	12.1139	1.20529e-22	0.428547	0.0358913	0.221172	ACTG1
ENSG00000184194	0.230201	0.555416	0.376454	0.359408	4.13206	0.126017	0.000110508	0.0102389	0.0147213	GPR173
ENSG00000184205	0.299184	0.206275	-0.00709735	-0.00820406	5.58089	0.00172897	0.032254	0.942541	0.933593	TSPYL2
ENSG00000184226	-0.843204	0.201684	0.324135	0.355952	5.62547	4.67918e-13	0.0498335	0.00137574	0.00042622	PCDH9
ENSG00000184277	-0.347322	-0.244069	-0.23281	-0.26441	4.94509	0.00254595	0.0312307	0.0394682	0.0198037	TM2D3
ENSG00000184371	0.0394986	0.0987347	0.179349	0.185888	6.8973	0.626463	0.221352	0.0253136	0.0203887	CSF1
ENSG00000184787	0.441087	0.178032	0.0282084	0.0142837	6.2401	1.93313e-07	0.0397251	0.747512	0.870663	UBE2G2
ENSG00000184897	-0.37664	-0.0941359	-0.326092	-0.223511	5.24205	0.000567466	0.371516	0.0026149	0.0366481	H1FX
ENSG00000185189	0.189839	0.254195	0.202992	0.0698839	6.44058	0.024651	0.00247306	0.0161501	0.412433	NRBP2
ENSG00000185201	-0.218271	-0.163247	-0.232054	-0.168991	5.23792	0.0345077	0.111073	0.0245585	0.0990236	IFITM2
ENSG00000185222	0.232749	0.173199	0.201087	0.0507966	6.74639	0.00392488	0.0326458	0.0129124	0.534338	TCEAL9
ENSG00000185567	-0.254535	0.147478	0.176142	0.178108	7.92016	0.000423003	0.0366645	0.0124374	0.0114644	AHNAK2
ENSG00000185650	0.173222	-0.0550046	0.144385	0.146615	7.96659	0.0143443	0.441239	0.041127	0.0380978	ZFP36L1
ENSG00000185658	-0.0238612	0.197659	0.221247	0.10702	6.11332	0.792503	0.0260326	0.0124169	0.23138	BRWD1
ENSG00000185697	1.43556	0.0425496	0.249173	-0.0580891	4.8325	1.25815e-48	0.708183	0.0243369	0.613459	MYBL1
ENSG00000186260	-0.826005	-0.28939	-0.186551	-0.125586	4.85199	9.99902e-12	0.0103025	0.0932757	0.255073	MKL2
ENSG00000186283	-0.325646	-0.284689	-0.227161	-0.274016	4.62458	0.00581113	0.0151156	0.0504295	0.0189618	TOR3A
ENSG00000187164	0.141441	0.173387	0.202527	0.0537999	5.61787	0.156539	0.0813462	0.0407204	0.592772	SHTN1
ENSG00000187244	-0.172517	-0.112275	-0.204914	-0.0883512	7.55643	0.0202293	0.129274	0.00589601	0.23174	BCAM
ENSG00000187840	0.303181	-0.122387	-0.2806	-0.283504	4.80139	0.00525449	0.284537	0.01614	0.0150781	EIF4EBP1
ENSG00000188070	-0.467117	0.19414	0.10799	0.142749	5.99243	1.4708e-06	0.0317055	0.235631	0.115727	C11orf95
ENSG00000188157	-0.0681741	-0.125182	-0.186415	0.0136674	10.188	0.289942	0.0520629	0.00387301	0.831401	AGRN
ENSG00000188229	-1.72127	-0.634103	0.927902	0.789845	7.91673	5.1655e-102	7.41614e-18	1.13784e-41	2.89048e-30	TUBB4B
ENSG00000188483	-0.379419	-0.264689	-0.434443	-0.120404	5.2563	0.000226552	0.0090433	2.60869e-05	0.227412	IER5L
ENSG00000188549	0.158576	0.358826	0.35223	0.31281	8.56023	0.0220862	1.64659e-07	2.7978e-07	5.18029e-06	C15orf52
ENSG00000188735	0.369772	0.293512	0.274789	-0.0565669	4.6967	0.00327481	0.0207146	0.0303814	0.670358	TMEM120B
ENSG00000189056	0.741676	0.159622	0.232529	0.0992251	5.1502	3.12414e-13	0.141481	0.0304898	0.363748	RELN
ENSG00000189223	0.738803	0.203775	0.27223	0.126249	6.72894	1.92793e-19	0.0169365	0.00130559	0.140751	PAX8-AS1
ENSG00000196205	-0.162243	-0.270001	-0.0522392	-0.0224492	7.9718	0.0216666	0.000143164	0.456444	0.748736	NA
ENSG00000196230	-2.13274	-0.567893	0.732369	0.637144	10.0868	2.74981e-193	9.06314e-18	2.85398e-30	3.39206e-23	TUBB
ENSG00000196655	0.163997	-0.195591	-0.303215	-0.19898	5.61766	0.0763161	0.0411386	0.00174	0.0377805	TRAPPC4
ENSG00000196715	0.403297	-0.165823	-0.198694	-0.151574	5.9678	2.51406e-06	0.0655094	0.0276566	0.0915829	VKORC1L1
ENSG00000196876	0.205909	0.213784	0.349488	0.022476	4.19222	0.137106	0.12147	0.00974265	0.873943	SCN8A
ENSG00000197019	0.465373	-0.446221	-0.253372	-0.182683	4.02391	8.04574e-05	0.000733905	0.0494439	0.151278	SERTAD1
ENSG00000197182	0.534212	0.429125	0.395316	0.407769	4.02787	0.000169606	0.00289565	0.00616177	0.00468544	MIRLET7BHG
ENSG00000197283	-0.174448	0.410966	0.253297	0.14663	6.45858	0.0635589	3.83096e-06	0.00490885	0.107006	SYNGAP1
ENSG00000197603	0.213886	0.162186	0.280039	0.171659	5.46103	0.0311505	0.103873	0.00440338	0.0845679	C5orf42
ENSG00000197858	-0.213602	-0.117558	-0.158803	-0.114682	8.18479	0.00252017	0.0947908	0.0242306	0.102963	GPAA1
ENSG00000197969	0.0901588	0.287638	0.262273	0.115671	6.66371	0.276835	0.000423972	0.00133198	0.161629	VPS13A
ENSG00000198087	0.296812	0.102137	0.16963	0.188777	6.63045	0.000238117	0.212427	0.0373102	0.0202864	CD2AP
ENSG00000198380	0.670863	0.164031	0.0539643	0.0394081	6.76026	6.4746e-18	0.0413238	0.505292	0.627043	GFPT1
ENSG00000198408	0.0109826	-0.223246	-0.126863	-0.345502	8.07599	0.874709	0.00170089	0.0741915	1.40919e-06	MGEA5
ENSG00000198563	0.128546	0.384048	0.270683	0.157928	7.36474	0.0948044	3.99829e-07	0.000403247	0.0398326	DDX39B
ENSG00000198625	0.189921	0.333986	0.3933	0.198923	4.45129	0.15821	0.0112656	0.00258154	0.137919	MDM4
ENSG00000198707	0.0665607	0.40044	0.339783	0.0295376	5.47031	0.530808	9.01826e-05	0.000954198	0.781529	CEP290
ENSG00000198715	-0.233607	-0.0758216	-0.0279307	-0.0800878	6.61211	0.00555647	0.361327	0.735527	0.33486	GLMP
ENSG00000198727	-0.0619385	-0.0757993	-0.0887987	-0.239187	11.0695	0.336972	0.240367	0.171996	0.000222817	CYTB
ENSG00000198743	0.0302927	0.0353358	0.27477	0.171884	8.03854	0.671884	0.621203	0.000102276	0.0155196	SLC5A3
ENSG00000198786	0.00909289	-0.137977	-0.0452186	-0.244824	11.1556	0.887464	0.0323036	0.484911	0.000150284	ND5
ENSG00000198792	0.435839	-0.0978152	-0.126966	-0.14511	7.48001	1.20856e-09	0.184948	0.0853856	0.0497591	TMEM184B
ENSG00000198804	-0.0322187	-0.0118153	-0.0533832	-0.189494	12.2258	0.614753	0.85342	0.40668	0.00312527	COX1
ENSG00000198816	-0.318448	-0.0322258	-0.265399	-0.15617	5.64489	0.00185536	0.744533	0.00898969	0.119036	ZNF358
ENSG00000198840	-0.118537	-0.0904811	-0.154534	-0.24848	9.0026	0.0778721	0.178336	0.0219083	0.000232553	ND3
ENSG00000198886	-0.0567555	-0.0672388	-0.0694647	-0.219498	12.4623	0.374951	0.293229	0.280548	0.000616645	ND4
ENSG00000198887	0.418456	0.191782	0.199326	0.0735903	6.38545	6.13263e-07	0.0247138	0.0193716	0.393322	SMC5
ENSG00000198888	0.0118	-0.00579093	0.0229893	-0.158091	10.209	0.856179	0.929074	0.724622	0.0152339	ND1
ENSG00000198900	-0.0594589	0.203311	0.175009	0.195234	7.29319	0.44283	0.00757182	0.0216689	0.0103385	TOP1
ENSG00000198901	-0.479346	-0.272921	-0.01699	-0.230603	5.12902	1.42253e-05	0.0110408	0.870066	0.0306734	PRC1
ENSG00000198919	-0.473493	0.245958	0.19842	0.196937	4.78317	0.000466914	0.04536	0.107893	0.110336	DZIP3
ENSG00000198933	0.0308628	0.361966	0.423977	0.268754	4.71507	0.821288	0.00554676	0.00102454	0.0415312	TBKBP1
ENSG00000198938	-0.0736816	0.0105568	-0.0364123	-0.181058	11.3635	0.252231	0.869494	0.573235	0.00494329	COX3
ENSG00000198951	-0.328676	-0.257307	-0.151978	-0.0292392	5.73784	0.000702086	0.00740867	0.109413	0.755158	NAGA
ENSG00000204237	0.285365	0.331062	0.0796159	0.34402	4.17465	0.0385506	0.0156947	0.573895	0.0116417	OXLD1
ENSG00000204386	-0.352108	-0.200688	-0.127561	-0.0263155	6.5547	5.37783e-05	0.0193954	0.134571	0.755587	NEU1
ENSG00000204498	-0.538925	-0.18279	-0.314557	-0.236103	4.30224	0.000231775	0.187445	0.0257707	0.0907716	NFKBIL1
ENSG00000204681	0.316541	0.44727	0.250426	0.10577	5.97117	0.000806116	1.58913e-06	0.00837603	0.272297	GABBR1
ENSG00000205581	0.0326237	0.283966	0.148412	0.0883704	5.90412	0.7338	0.00238017	0.116772	0.353296	HMGN1
ENSG00000210082	-0.0378394	-0.0903887	-0.133433	-0.268546	11.3203	0.555753	0.158983	0.0385082	3.11497e-05	RNR2
ENSG00000211459	-0.0932353	-0.131086	-0.209644	-0.308663	7.91846	0.193447	0.0675791	0.00369054	2.06425e-05	RNR1
ENSG00000212802	-0.286572	-0.186945	-0.227048	-0.162195	5.74634	0.0026708	0.0477712	0.0166669	0.0851226	NA
ENSG00000212907	-0.0642486	-0.239128	-0.100291	-0.229528	9.27264	0.335402	0.000361057	0.135027	0.000619097	ND4L
ENSG00000213462	-0.131256	0.17139	0.240352	0.24614	4.83751	0.283802	0.144612	0.0388762	0.0342187	ERV3-1
ENSG00000213593	0.314501	0.104524	0.0644091	0.0296444	5.20413	0.00246677	0.324483	0.545639	0.78169	TMX2
ENSG00000213626	0.93245	-0.314865	-0.360859	-0.412399	7.00057	7.19061e-38	4.8572e-05	3.41801e-06	1.30029e-07	LBH
ENSG00000213763	0.719509	-0.17945	-0.26374	-0.182227	5.51116	1.43522e-16	0.0573999	0.0056231	0.0535928	NA
ENSG00000214021	0.271294	0.49383	0.324879	0.205353	5.95083	0.00528289	2.05152e-07	0.000760399	0.0355582	TTLL3
ENSG00000214391	-2.28703	-0.67279	0.651405	0.756548	4.46675	1.34508e-37	1.22062e-06	1.76993e-08	3.42288e-11	NA
ENSG00000214548	0.333746	0.476343	0.264158	0.0600815	9.80088	3.80797e-07	3.87963e-13	7.41457e-05	0.365909	MEG3
ENSG00000214612	-0.295409	-0.301734	-0.30421	-0.142745	4.57506	0.0124451	0.0106038	0.0099418	0.216416	NA
ENSG00000215012	0.286109	-0.263367	-0.333323	-0.263704	4.64488	0.00880473	0.0241764	0.00463144	0.0238156	C22orf29
ENSG00000215252	0.360774	0.572514	0.518515	0.269215	4.51686	0.0084772	1.65866e-05	0.000102579	0.0517291	GOLGA8A
ENSG00000216775	-0.0691181	0.286047	0.310587	0.244559	6.07851	0.440343	0.000966032	0.000325856	0.00490736	LOC730101
ENSG00000222009	0.366623	0.639907	0.568613	0.417329	5.44811	0.000600066	6.54783e-10	4.82218e-08	8.34981e-05	BTBD19
ENSG00000223745	0.291444	0.590872	0.437411	0.142825	4.70825	0.026259	2.60694e-06	0.000634733	0.284158	NA
ENSG00000224078	-0.212341	0.24118	0.191972	0.0923446	5.75727	0.0342396	0.0115662	0.0450405	0.340468	NA
ENSG00000224596	0.185907	0.597208	0.633691	0.223836	4.47968	0.184277	6.99189e-06	1.55347e-06	0.108232	ZMIZ1-AS1
ENSG00000225921	-0.215163	-0.208549	-0.264069	-0.155102	5.38198	0.0327733	0.0381034	0.00906238	0.120456	NOL7
ENSG00000227036	0.114704	0.437763	0.387699	0.272823	4.55276	0.402134	0.00083413	0.00326591	0.0415205	LINC00511
ENSG00000229807	0.290581	0.367955	0.39512	0.203268	7.80916	5.46296e-05	2.87943e-07	3.69166e-08	0.00491863	XIST
ENSG00000236333	0.181931	0.432624	0.385613	0.346006	4.447	0.181474	0.00100575	0.00351458	0.009138	TRHDE-AS1
ENSG00000236811	-0.242036	-0.45058	-0.182188	-0.0707996	6.93381	0.00177333	1.00857e-08	0.017988	0.354271	NA
ENSG00000237350	-0.0241358	-0.295046	-0.243708	-0.206531	4.35294	0.84185	0.0184028	0.0498078	0.0943975	NA
ENSG00000240342	-0.184545	-0.198156	-0.286008	-0.0555696	6.25142	0.0345272	0.0233231	0.00118492	0.520416	NA
ENSG00000240950	-0.29451	0.0515109	-0.197496	-0.306564	4.67971	0.0163977	0.660962	0.103005	0.0123626	NA
ENSG00000243927	0.207467	0.139053	0.24713	0.119589	6.74215	0.0119765	0.0938097	0.00269494	0.14996	MRPS6
ENSG00000245532	0.370925	0.741476	0.521015	0.25845	9.60229	2.20518e-08	7.20389e-30	4.02557e-15	9.39884e-05	NEAT1
ENSG00000245937	-0.313635	-0.16249	-0.304661	-0.298654	4.66598	0.00852083	0.163956	0.0102443	0.0117381	LINC01184
ENSG00000249489	-0.232694	-0.283108	-0.0893696	-0.0497356	8.42361	0.000700232	3.78017e-05	0.189488	0.465087	NA
ENSG00000249992	1.68605	-0.230589	-0.105901	-0.289163	4.28202	1.34433e-50	0.106772	0.451233	0.0450494	TMEM158
ENSG00000251562	0.366331	0.640838	0.433474	0.239361	7.61992	1.05906e-06	3.83018e-18	7.10561e-09	0.00152891	MALAT1
ENSG00000253729	0.169535	0.132144	0.0990088	0.0231142	7.2416	0.0224484	0.0756981	0.184539	0.757577	PRKDC
ENSG00000255248	0.322702	0.333688	0.235888	0.21283	7.52174	1.33297e-05	6.35487e-06	0.0015076	0.00423177	MIR100HG
ENSG00000257354	0.20925	0.505396	0.37474	0.219381	5.62355	0.0426091	4.7349e-07	0.000217875	0.0336507	NA
ENSG00000257621	0.14688	0.344284	0.258374	-0.0362116	5.18144	0.174956	0.00114264	0.0154386	0.742849	PSMA3-AS1
ENSG00000259439	-0.151928	0.263017	0.179932	0.193674	7.67328	0.0429337	0.000348231	0.0147762	0.0087309	LINC01833
ENSG00000264112	0.246875	0.686758	0.579671	0.177877	4.60527	0.0905154	5.36857e-07	2.93678e-05	0.226184	NA
ENSG00000265972	-0.569941	-0.199715	-0.0405413	-0.0459973	8.99158	1.60304e-16	0.00340566	0.54971	0.496973	TXNIP
ENSG00000270069	0.734691	0.701801	0.308494	0.155572	5.14892	2.24135e-11	1.91776e-10	0.00735171	0.184947	NA
ENSG00000276550	0.115044	0.354131	0.259712	0.0775292	5.04857	0.343956	0.00264046	0.0290059	0.524544	HERC2P2
ENSG00000154114	-0.306937	-0.0952821	-0.0988896	0.0146707	0.0461379	0.437741	TBCEL
ENSG00000154127	1.05255	-0.301193	0.0284782	5.16705e-21	0.976958	0.0216465	UBASH3B
ENSG00000154310	-0.104516	-0.226888	-0.216309	0.283876	0.540185	0.0217386	TNIK
ENSG00000154358	-0.489511	0.196423	0.240833	7.46639e-05	0.82699	0.0851523	OBSCN
ENSG00000154380	0.212512	-0.180768	-0.129293	0.014037	0.771519	0.0426597	ENAH
ENSG00000154429	-0.419546	-0.0174835	-0.124317	0.00213833	0.044626	0.892967	CCSAP
ENSG00000154556	-0.782986	-0.349971	-0.105826	7.80185e-12	0.714591	0.00132629	SORBS2
ENSG00000154678	0.379457	-0.493885	-0.293959	4.13089e-06	0.0822884	1.65522e-08	PDE1C
ENSG00000154721	-0.323897	0.265401	0.214838	0.00731823	0.806147	0.0188153	JAM2
ENSG00000155252	0.260104	-0.194681	-0.00190441	0.00465423	0.157853	0.0419369	PI4K2A
ENSG00000155755	0.306291	-0.19014	-0.153722	0.00086786	0.766988	0.0478982	TMEM237
ENSG00000156515	0.265636	-0.177927	-0.101301	0.000213054	0.798611	0.0142107	HK1
ENSG00000156535	-0.33113	-0.0719898	-0.174498	0.000202496	0.0067091	0.410466	CD109
ENSG00000157020	0.224286	-0.158631	-0.067928	0.00286354	0.743055	0.0378695	SEC13
ENSG00000157216	-0.56909	0.227533	0.222458	3.96555e-07	0.969894	0.0274015	SSBP3
ENSG00000157227	1.01328	0.201864	0.209759	4.365e-49	0.238876	0.00328499	MMP14
ENSG00000157240	-0.554288	0.306765	0.164638	1.90924e-14	0.190426	1.4959e-05	FZD1
ENSG00000157600	-0.537563	0.2658	0.124595	3.57632e-11	0.672681	0.000639117	TMEM164
ENSG00000157827	-0.599392	0.140912	0.0181471	2.88617e-15	0.0482306	0.0560659	FMNL2
ENSG00000158258	1.03803	0.180361	0.212708	2.00851e-34	0.015545	0.0438325	CLSTN2
ENSG00000158615	0.219314	0.248903	0.130975	0.0268435	0.329168	0.0119075	PPP1R15B
ENSG00000159069	0.21813	-0.10985	0.0672525	0.00650775	0.0225673	0.178824	FBXW5
ENSG00000159111	-0.0888274	-0.0185251	0.224485	0.356979	0.0389551	0.846961	MRPL10
ENSG00000159131	0.322308	-0.201915	-0.176034	0.000492375	0.409462	0.0372629	GART
ENSG00000159176	0.387699	-0.238526	-0.0768969	3.51802e-07	0.974652	0.00230132	CSRP1
ENSG00000159199	0.332966	-0.554411	-0.231593	0.00351275	0.0281504	1.32973e-05	ATP5G1
ENSG00000159363	0.471849	-0.256059	-0.0387406	2.04079e-07	0.648251	0.00808481	ATP13A2
ENSG00000159784	0.551058	0.262105	0.20111	2.56749e-06	0.00511514	0.0308319	FAM131B
ENSG00000159792	0.184073	-0.0400327	0.0508244	0.0428893	0.0480964	0.665918	PSKH1
ENSG00000159840	0.650597	-0.290807	0.00949262	6.43341e-20	0.168655	6.22272e-05	ZYX
ENSG00000160293	0.127416	-0.201365	-0.245162	0.198752	0.504986	0.0496796	VAV2
ENSG00000160789	-0.323112	-0.159118	-0.0445439	3.09758e-06	0.752	0.0212798	LMNA
ENSG00000160972	0.22476	-0.267436	0.100795	0.0447357	0.182072	0.0243724	PPP1R16A
ENSG00000161010	-0.25118	0.248434	0.0732379	0.0301464	0.821338	0.0235951	MRNIP
ENSG00000161638	0.568288	-0.145738	-0.0596099	1.20726e-16	0.478932	0.034514	ITGA5
ENSG00000161682	-0.5951	0.0283988	0.267671	1.3607e-08	0.0530076	0.773179	FAM171A2
ENSG00000162407	-1.73142	-0.303699	-0.151224	9.22262e-99	0.00197145	5.32589e-05	PLPP3
ENSG00000162496	0.39375	0.204571	0.285777	2.65595e-08	0.000417227	0.0039623	DHRS3
ENSG00000162591	0.302812	-0.195789	0.0233382	1.19147e-05	0.164391	0.00490967	MEGF6
ENSG00000162613	-0.164148	-0.0998351	-0.0930672	0.0431649	0.0116817	0.217551	FUBP1
ENSG00000162614	0.625837	-0.260485	-0.391329	1.37427e-10	0.00308372	0.0143312	NEXN
ENSG00000162704	0.0647446	-0.279284	-0.208419	0.393408	0.299373	0.000291036	ARPC5
ENSG00000162734	0.201199	-0.428485	-0.249272	0.00590606	0.743068	9.89284e-09	PEA15
ENSG00000162840	1.45076	-0.233144	0.102466	1.02678e-56	0.149637	0.0264552	NA
ENSG00000163191	0.394734	-0.269885	-0.0992643	2.98972e-07	0.62457	0.000689194	S100A11
ENSG00000163251	-0.94581	-0.0959147	-0.251382	9.15917e-13	0.912871	0.42033	FZD5
ENSG00000163346	-0.405977	0.137348	0.162922	8.69244e-09	0.318414	0.0491489	PBXIP1
ENSG00000163430	0.264481	-0.15534	-0.118404	0.000144307	0.958632	0.0265604	FSTL1
ENSG00000163462	-0.277463	-0.125256	-0.114311	0.0163837	0.0167408	0.271117	TRIM46
ENSG00000163481	0.309864	0.205048	0.10978	0.0196817	0.020852	0.128728	RNF25
ENSG00000163510	-0.34871	-0.00517576	-0.224579	0.00243408	0.270446	0.962752	CWC22
ENSG00000163539	-0.244705	0.206549	0.0858762	0.0115578	0.281144	0.0267876	CLASP2
ENSG00000163565	-0.028161	0.29713	0.167243	0.727574	0.427796	0.000188598	IFI16
ENSG00000163629	-0.233548	0.224695	0.117396	0.0106081	0.889314	0.0109527	PTPN13
ENSG00000163661	0.989878	-0.369707	-0.279589	1.37032e-25	0.515973	0.000580601	PTX3
ENSG00000163704	-0.35493	0.230176	0.239244	0.000593949	0.0193331	0.0185734	PRRT3
ENSG00000163710	0.36314	0.0181094	0.0105582	0.00447234	0.0435369	0.89231	PCOLCE2
ENSG00000163728	-0.376142	0.150943	-0.0491646	2.63088e-05	0.0444375	0.0797236	TTC14
ENSG00000163755	-0.276893	0.328301	0.0992771	0.000860792	0.728331	4.377e-05	HPS3
ENSG00000163788	-0.337442	0.389396	0.115897	0.000420487	0.920704	1.5764e-05	SNRK
ENSG00000163870	-0.222078	-0.217243	-0.0135434	0.0179527	0.477071	0.0207812	TPRA1
ENSG00000163931	-0.664563	0.0635234	0.163344	1.59596e-22	0.0898546	0.34664	TKT
ENSG00000163947	-0.737439	0.407709	0.094003	2.41472e-12	0.181925	1.54451e-05	ARHGEF3
ENSG00000164023	0.68181	-0.309485	-0.286154	1.57743e-13	0.810125	0.00216116	SGMS2
ENSG00000164039	0.0731043	0.510075	0.24334	0.584318	0.0414755	5.7671e-05	BDH2
ENSG00000164066	-0.356339	0.266941	0.117827	0.00661589	0.771126	0.0282228	INTU
ENSG00000164096	-0.068161	-0.164658	-0.153059	0.342824	0.421148	0.0223535	C4orf3
ENSG00000164099	0.252608	-0.224807	-0.116356	0.00189464	0.65495	0.00729907	PRSS12
ENSG00000164105	-0.6962	-0.231599	-0.280227	1.00779e-12	0.577334	0.0133392	SAP30
ENSG00000164111	0.182578	-0.184673	-0.174409	0.00759852	0.709654	0.00715027	ANXA5
ENSG00000164161	0.46114	-0.272119	0.0424881	2.42882e-06	0.320869	0.00970704	HHIP
ENSG00000164300	0.266733	0.219701	0.141243	0.00604918	0.473547	0.0245858	SERINC5
ENSG00000164442	0.225026	-0.190531	-0.11686	0.00201528	0.237381	0.00986568	CITED2
ENSG00000164574	0.397465	-0.307934	-0.191227	7.25839e-09	0.873459	8.70919e-06	GALNT10
ENSG00000164741	1.01288	-0.0259996	-0.00875542	3.18746e-35	0.0254699	0.764265	DLC1
ENSG00000164877	-0.235928	-0.191283	-0.0461628	0.037313	0.0298755	0.0904416	MICALL2
ENSG00000164880	0.184548	-0.215088	0.0093324	0.017115	0.995655	0.00645802	INTS1
ENSG00000164951	0.248435	-0.185909	-0.139228	0.00163499	0.4057	0.0213446	PDP1
ENSG00000165006	0.284621	0.0944583	0.103934	0.00140863	0.0141978	0.296888	UBAP1
ENSG00000165029	-0.553674	0.426905	0.31375	1.27612e-09	0.716189	4.974e-07	ABCA1
ENSG00000165072	-0.758737	-0.0552213	0.0230318	9.53584e-11	0.0252623	0.609807	MAMDC2
ENSG00000165097	-0.302254	-0.390296	-0.0682626	0.0142708	0.278773	0.0018019	KDM1B
ENSG00000165233	-0.140998	0.227156	0.282623	0.0733081	0.324442	0.00336225	CARD19
ENSG00000165475	-0.35038	-0.264301	-0.171977	0.00717829	0.231211	0.0408006	CRYL1
ENSG00000165476	0.219179	-0.117576	-0.153972	0.00360097	0.964649	0.123503	REEP3
ENSG00000165655	0.268427	0.0533201	0.337285	0.03013	0.246154	0.675568	ZNF503
ENSG00000165732	0.251818	-0.123567	-0.186385	0.00175073	0.247507	0.133112	DDX21
ENSG00000165912	-0.440104	-0.312196	-0.00754464	8.28249e-06	0.108843	0.00139283	PACSIN3
ENSG00000166037	-0.239184	0.19635	0.0441237	0.00825787	0.978304	0.0251703	CEP57
ENSG00000166073	0.836279	-0.246948	-0.109829	1.07541e-22	0.969182	0.00732924	GPR176
ENSG00000166147	0.384044	-0.395818	-0.153283	2.22408e-08	0.00229808	1.11872e-08	FBN1
ENSG00000166313	0.283407	0.0557712	0.147312	0.00306893	0.0471483	0.568649	APBB1
ENSG00000166340	-0.141088	0.155063	0.11514	0.0448722	0.75522	0.0267523	TPP1
ENSG00000166503	0.190889	-0.203402	-0.127496	0.0438375	0.19326	0.0385909	HDGFRP3
ENSG00000166710	-0.233494	0.16915	0.0319645	0.000610997	0.708202	0.0127706	B2M
ENSG00000166922	1.54069	-0.160335	-0.355489	5.86804e-53	0.0252378	0.177978	SCG5
ENSG00000166923	1.16399	-0.185278	-0.30142	1.49427e-53	0.523028	0.0191845	GREM1
ENSG00000167074	0.243745	0.238638	0.199952	0.0130692	0.369485	0.0153171	TEF
ENSG00000167085	0.22809	-0.259658	-0.0957935	0.0409115	0.404145	0.0281326	PHB
ENSG00000167106	0.154617	0.23406	0.277247	0.110077	0.0233987	0.0150287	FAM102A
ENSG00000167323	-0.522696	0.196149	0.0914445	4.89663e-08	0.294778	0.0296563	STIM1
ENSG00000167460	0.427446	-0.288887	-0.178407	1.76627e-09	0.686135	6.27046e-05	TPM4
ENSG00000167552	-1.20036	1.64456	0.854161	1.17744e-53	3.41742e-13	2.89139e-114	TUBA1A
ENSG00000167553	-0.894734	0.617326	0.468213	6.04875e-13	0.000795819	3.83473e-09	TUBA1C
ENSG00000167601	0.342849	-0.22859	-0.0108769	1.01346e-06	0.509494	0.0012546	AXL
ENSG00000167645	0.46258	-0.345843	-0.106287	5.87371e-08	0.172576	0.000134189	YIF1B
ENSG00000167680	0.22967	0.198243	0.257595	0.0102324	0.0029789	0.0272353	SEMA6B
ENSG00000167702	-0.333355	-0.221336	-0.0961298	0.000223204	0.129001	0.0135305	KIFC2
ENSG00000167747	0.338653	-0.335972	0.141478	0.000906463	0.323532	0.0022005	C19orf48
ENSG00000167767	0.438214	-0.664617	-0.351831	2.36354e-06	0.543282	1.16729e-10	KRT80
ENSG00000167797	0.327208	-0.32827	-0.0406108	0.00102584	0.11131	0.00208657	CDK2AP2
ENSG00000167964	-1.20161	0.469123	0.471075	1.85465e-22	0.00770587	4.30202e-06	RAB26
ENSG00000167996	-0.522179	-0.352564	0.0557714	8.95198e-14	0.024566	4.34909e-07	FTH1
ENSG00000168140	-0.0555182	-0.0271354	0.182772	0.494144	0.0427302	0.738099	VASN
ENSG00000168209	-1.05203	0.277432	0.327555	1.82077e-19	0.34827	0.00591415	DDIT4
ENSG00000168216	-0.34479	0.222226	0.171436	9.48085e-05	0.936807	0.00887719	LMBRD1
ENSG00000168234	0.056527	0.269876	0.305253	0.69342	0.0415069	0.0534046	TTC39C
ENSG00000168268	0.253815	-0.230107	-0.0916835	0.000530376	0.772858	0.00199636	NT5DC2
ENSG00000168297	-0.374448	0.247159	0.137733	9.91959e-06	0.924874	0.00244903	PXK
ENSG00000168301	-0.944356	0.232905	0.0699549	5.47132e-19	0.971884	0.013682	KCTD6
ENSG00000168411	0.341171	-0.27821	-0.110154	0.00169301	0.552026	0.0171635	RFWD3
ENSG00000168461	0.7184	0.23826	0.262828	3.06473e-17	0.579392	0.00661926	RAB31
ENSG00000168672	-0.22425	-0.331645	-0.342216	0.0469628	0.210993	0.00379509	FAM84B
ENSG00000168874	-0.931362	0.0848472	0.34645	6.1316e-17	0.930753	0.39594	ATOH8
ENSG00000168906	-0.385414	0.112864	0.0784239	3.55109e-07	0.0413622	0.128702	MAT2A
ENSG00000168916	-0.968248	0.269313	0.0765936	3.05523e-16	0.804144	0.00908156	ZNF608
ENSG00000168994	0.486154	-0.550597	-0.457303	2.2408e-06	0.285078	1.75033e-06	PXDC1
ENSG00000169047	-0.665545	-0.282844	-0.0437092	4.8827e-14	0.690537	0.000981553	IRS1
ENSG00000169169	-0.405479	0.0223032	0.213376	0.000158395	0.107721	0.828227	CPT1C
ENSG00000169184	0.70859	-0.419474	-0.130585	7.02544e-08	0.473532	0.00616169	MN1
ENSG00000169375	-0.249767	0.170837	0.0627963	0.00364041	0.549956	0.0410481	SIN3A
ENSG00000169710	1.01343	-0.16852	0.0673654	8.03291e-41	0.765023	0.0330422	FASN
ENSG00000169750	0.578378	-0.0879528	0.0278286	6.89591e-07	0.0137676	0.486304	RAC3
ENSG00000169760	0.333271	0.276357	0.19459	0.0122104	0.15588	0.0395595	NLGN1
ENSG00000169855	0.179981	0.120711	0.168073	0.0237813	0.503633	0.130996	ROBO1
ENSG00000170043	0.235986	-0.242182	0.00332062	0.00690553	0.197756	0.00760726	TRAPPC1
ENSG00000170271	-0.347682	0.310184	0.147376	0.000286148	0.254692	0.000633704	FAXDC2
ENSG00000170312	1.04039	-0.637142	-0.365228	9.53988e-18	0.319385	2.33802e-05	CDK1
ENSG00000170412	-0.257167	0.0807621	0.202448	0.0169011	0.269653	0.437792	GPRC5C
ENSG00000170421	0.465228	-0.184188	-0.0764178	2.51638e-10	0.221589	0.0141789	KRT8
ENSG00000170540	-0.29767	-0.164144	0.0199823	0.000222678	0.711369	0.0404228	ARL6IP1
ENSG00000170545	0.74017	0.0866207	0.288628	3.61164e-09	0.0828364	0.525178	SMAGP
ENSG00000170571	0.112005	-0.276881	-0.194777	0.188518	0.319221	0.00159514	EMB
ENSG00000170776	0.292632	0.107581	-0.0135651	0.00161469	0.0189609	0.254338	AKAP13
ENSG00000170873	-0.507517	0.469318	0.235029	0.00013256	0.487615	6.93173e-05	MTSS1
ENSG00000170892	-0.208835	-0.200343	-0.0227857	0.0185329	0.919606	0.0239985	TSEN34
ENSG00000171067	0.443146	-0.386774	-0.196389	9.07437e-07	0.467913	6.61908e-05	C11orf24
ENSG00000171163	-0.201775	-0.0721332	0.0213094	0.0289048	0.0335201	0.430521	ZNF692
ENSG00000171223	0.331876	0.0313964	-0.0665143	0.00222434	4.18391e-06	0.779842	JUNB
ENSG00000171310	0.281899	0.128812	0.181238	0.00162955	0.124211	0.155289	CHST11
ENSG00000171503	-0.342818	-0.17314	-0.256341	0.00802689	0.0553695	0.172313	ETFDH
ENSG00000171552	0.436238	-0.0105695	0.0875775	1.90662e-08	0.0388524	0.893892	BCL2L1
ENSG00000171793	0.539839	-0.818719	-0.595646	6.47081e-06	0.0695586	9.98983e-09	CTPS1
ENSG00000171848	1.41305	-0.367977	-0.197604	6.09e-48	0.241559	0.00141339	RRM2
ENSG00000171862	-0.22593	0.162285	0.0701855	0.00447138	0.910493	0.0375218	PTEN
ENSG00000171877	0.540192	-0.273755	-0.03211	1.49205e-05	0.896774	0.0484294	FRMD5
ENSG00000171951	-0.715665	0.439348	0.0460765	2.06823e-18	0.178558	1.16428e-08	SCG2
ENSG00000172009	0.364615	-0.355703	-0.114755	0.000118256	0.302199	0.000454879	THOP1
ENSG00000172115	0.447857	-0.376588	-0.323498	3.58963e-05	0.0145709	0.00158306	CYCS
ENSG00000172273	-0.249291	-0.0422923	-0.0752899	0.0419129	0.0409826	0.724011	HINFP
ENSG00000172301	-0.249311	0.226531	0.0474355	0.00285628	0.911349	0.00533858	COPRS
ENSG00000172380	0.205387	-0.166561	-0.163577	0.00360043	0.773612	0.0191522	GNG12
ENSG00000172757	0.344559	-0.339512	-0.101021	5.91894e-07	0.44007	1.08655e-06	CFL1
ENSG00000172869	-0.215314	-0.0527068	-0.106538	0.0214989	0.0289953	0.568809	DMXL1
ENSG00000172965	-0.0550826	-0.231116	-0.251892	0.596709	0.995403	0.0296572	MIR4435-2HG
ENSG00000173068	0.24733	-0.0422182	-0.1306	0.00460569	0.0299887	0.636315	BNC2
ENSG00000173209	-0.241365	0.100927	-0.0737714	0.00217706	0.0125367	0.192942	AHSA2
ENSG00000173227	-0.28366	0.504659	0.379832	0.0704195	0.140019	0.000347325	SYT12
ENSG00000173334	-0.920041	0.242473	0.157355	4.01082e-28	0.727363	0.00190376	TRIB1
ENSG00000173457	0.282661	-0.275462	-0.115785	0.00452937	0.55166	0.00901401	PPP1R14B
ENSG00000173517	-0.308553	-0.04573	-0.0665786	0.000194127	0.0206712	0.574942	PEAK1
ENSG00000173786	-0.0250194	0.106369	0.176501	0.753049	0.0233388	0.178558	CNP
ENSG00000174021	0.218765	-0.273649	0.0928963	0.0196522	0.055584	0.00532286	GNG5
ENSG00000174332	-0.355356	-0.353627	0.0158827	0.00036204	0.183891	0.000396252	GLIS1
ENSG00000174839	0.271064	0.276431	0.087357	0.01911	0.712327	0.0170291	DENND6A
ENSG00000174851	0.490106	-0.22906	0.0320808	1.18426e-08	0.521571	0.0115173	YIF1A
ENSG00000175130	-0.490933	0.132595	0.275358	5.33795e-11	0.035032	0.0700842	MARCKSL1
ENSG00000175166	0.439607	-0.154977	-0.0570272	2.31103e-09	0.756731	0.0388168	PSMD2
ENSG00000175334	-0.0396655	-0.227086	-0.18941	0.671418	0.747397	0.0171103	BANF1
ENSG00000175416	0.295865	-0.251604	0.150981	0.00383763	0.176161	0.0204248	CLTB
ENSG00000175471	-0.470591	0.262801	0.0488721	3.89984e-05	0.512297	0.012923	MCTP1
ENSG00000175592	0.519997	-0.185558	0.0336771	1.62018e-10	0.0395982	0.0287719	FOSL1
ENSG00000175662	-0.392857	-0.217327	0.102457	1.65502e-06	0.339532	0.00742874	TOM1L2
ENSG00000175756	0.334752	-0.225549	0.0443534	0.000413519	0.0523184	0.0240127	AURKAIP1
ENSG00000175792	0.0114887	-0.221223	-0.260293	0.912039	0.296417	0.038329	RUVBL1
ENSG00000175895	-0.364824	-0.00162373	-0.237432	0.00370735	0.0496248	0.989244	PLEKHF2
ENSG00000176014	-0.474044	0.708155	0.291594	1.23079e-08	0.00067594	1.56436e-19	TUBB6
ENSG00000176142	-0.190032	-0.145954	-0.206031	0.0377565	0.178195	0.109852	TMEM39A
ENSG00000176170	1.13865	-0.387836	0.0367425	2.23148e-24	0.717013	0.00373837	SPHK1
ENSG00000176343	0.25933	0.041624	0.128171	0.0207025	0.0157114	0.717649	NA
ENSG00000176410	0.124969	0.167058	0.297265	0.393713	0.00126582	0.252763	DNAJC30
ENSG00000176692	0.514112	-0.122804	0.110224	1.02048e-05	0.042557	0.329437	FOXC2
ENSG00000176720	0.234936	-0.299055	0.0290714	0.036876	0.804807	0.0127457	BOK
ENSG00000176788	0.249814	-0.213795	-0.0978535	0.00215019	0.2373	0.0107511	BASP1
ENSG00000177000	-0.659466	0.219078	0.00767498	1.61756e-10	0.639761	0.0209459	MTHFR
ENSG00000177042	-0.447723	-0.315778	-0.111409	0.000232088	0.934518	0.00847273	TMEM80
ENSG00000177200	-0.244661	-0.00617833	-0.0663768	0.00378968	0.0427006	0.940867	CHD9
ENSG00000177469	0.16234	-0.28114	-0.11576	0.0206478	0.927889	7.14122e-05	CAVIN1
ENSG00000177606	1.12964	-0.485572	-0.310622	1.08966e-41	0.326077	1.86062e-07	JUN
ENSG00000177674	0.459192	0.137535	0.208751	4.33739e-06	0.0702664	0.182679	AGTRAP
ENSG00000178209	-0.427551	-0.256352	-0.0292567	1.1154e-09	0.204072	0.000246414	PLEC
ENSG00000178531	0.29136	-0.345694	-0.0731602	0.000943904	0.31639	0.000195996	CTXN1
ENSG00000178726	0.352445	0.699945	0.515368	0.00297149	0.38672	9.47928e-10	THBD
ENSG00000178773	0.429175	-0.20565	-0.110677	1.60702e-07	0.0645375	0.0158405	CPNE7
ENSG00000178988	-0.280375	-0.0295486	-0.0780608	0.00199489	0.0419879	0.739969	MRFAP1L1
ENSG00000179163	-0.317964	0.203325	0.151087	5.51332e-05	0.203306	0.00826044	FUCA1
ENSG00000179295	0.224912	-0.193299	-0.0926189	0.00319845	0.893668	0.0129233	PTPN11
ENSG00000179820	0.904531	-0.244022	0.00196418	5.90345e-28	0.0321646	0.00591342	MYADM
ENSG00000179869	-0.529765	0.2735	0.111346	6.63238e-05	0.786991	0.0230303	ABCA13
ENSG00000179912	-0.2192	0.196318	0.18674	0.0153771	0.732117	0.0252675	R3HDM2
ENSG00000180190	-0.497281	0.241922	0.0747655	5.74565e-05	0.580011	0.0329381	TDRP
ENSG00000180530	0.173117	0.209421	0.15421	0.0447372	0.930513	0.0150704	NRIP1
ENSG00000180730	-1.01497	0.40116	0.220045	6.25383e-26	0.341271	2.93036e-06	SHISA2
ENSG00000180801	0.463066	-0.370316	-0.111955	4.16611e-05	0.56341	0.00303731	ARSJ
ENSG00000180891	-0.257666	-0.00511745	0.17043	0.00112142	0.542586	0.947782	CUEDC1
ENSG00000180900	0.187046	-0.244162	-0.0404295	0.0437827	0.893161	0.0114161	SCRIB
ENSG00000180914	1.19751	-1.17171	-0.471724	3.77224e-17	0.898183	5.14309e-09	OXTR
ENSG00000181019	-1.14411	0.16787	0.0321927	7.14384e-57	0.313038	0.0157177	NQO1
ENSG00000181649	0.680164	0.0940997	0.284875	1.47718e-06	0.000933369	0.53917	PHLDA2
ENSG00000181789	0.144854	-0.19295	-0.0937775	0.0459594	0.98073	0.00852462	COPG1
ENSG00000182022	0.224162	0.573117	0.394253	0.0997021	0.0219836	1.14228e-05	CHST15
ENSG00000182054	0.396095	-0.281431	-0.081448	6.61116e-06	0.421746	0.00242664	IDH2
ENSG00000182197	0.435479	-0.270184	-0.230265	2.10961e-08	0.877685	0.000792119	EXT1
ENSG00000182481	0.564243	-0.424077	-0.0170521	3.3059e-08	0.986685	0.000188883	KPNA2
ENSG00000182621	-0.408718	0.290244	0.215141	0.00102792	0.799555	0.011444	PLCB1
ENSG00000182667	0.872496	-0.338627	-0.0888899	2.58409e-16	0.786776	0.00548683	NTM
ENSG00000182752	0.303176	0.108062	0.180014	0.000156109	0.68542	0.182554	PAPPA
ENSG00000182809	-0.691768	-0.256174	0.0413478	5.78384e-17	0.0919419	0.00144657	CRIP2
ENSG00000183010	0.504566	-0.484089	-0.345872	5.04167e-09	0.406282	2.10243e-07	PYCR1
ENSG00000183111	-0.430926	0.168566	0.231644	0.000581969	0.372821	0.148747	ARHGEF37
ENSG00000183454	-0.224893	0.413655	0.318153	0.121476	0.486423	0.00198731	GRIN2A
ENSG00000183580	0.312841	0.0405195	0.264873	0.0105073	0.11792	0.749086	FBXL7
ENSG00000183684	0.356409	-0.26377	-0.198289	0.00284879	0.920771	0.0412067	ALYREF
ENSG00000183778	-0.818301	-0.23134	0.0166407	1.41787e-11	0.067403	0.040689	B3GALT5
ENSG00000184009	0.152635	-0.424617	-0.171149	0.0226657	0.421923	2.60181e-10	ACTG1
ENSG00000184216	0.650714	-0.270902	-0.0429715	2.25263e-17	0.153443	0.000705333	IRAK1
ENSG00000184226	-1.46607	-0.138297	-0.0667632	4.90356e-49	0.00442675	0.116011	PCDH9
ENSG00000184347	0.523352	-0.244482	-0.0525186	1.24367e-10	0.444297	0.00413296	SLIT3
ENSG00000184575	0.170538	-0.129643	-0.229729	0.0398515	0.266267	0.125773	XPOT
ENSG00000184602	0.288301	0.311304	0.193997	0.00594474	0.0605417	0.00296249	SNN
ENSG00000184838	-0.212985	-0.214891	-0.246057	0.0109697	0.712469	0.010386	PRR16
ENSG00000184898	-0.450035	0.268867	0.0511969	0.000137415	0.834784	0.0136119	RBM43
ENSG00000185022	0.832458	-0.263903	-0.195708	1.20045e-12	0.796167	0.0489592	MAFF
ENSG00000185100	-0.677719	0.378407	0.185038	9.08362e-07	0.311127	0.00174706	ADSSL1
ENSG00000185189	-0.201042	-0.111236	-0.0255594	0.0167136	0.0274483	0.183447	NRBP2
ENSG00000185340	-0.231837	-0.272084	0.0475476	0.0214392	0.842228	0.00729242	GAS2L1
ENSG00000185499	0.390572	0.203182	0.164123	0.00290289	0.0181028	0.131276	MUC1
ENSG00000185567	0.00664138	-0.271955	-0.130349	0.927408	0.0180066	0.000220301	AHNAK2
ENSG00000185585	-0.511305	0.185714	0.168807	4.86427e-12	0.524391	0.010289	OLFML2A
ENSG00000185630	-0.100884	0.166868	0.191696	0.234207	0.739389	0.0455629	PBX1
ENSG00000185697	0.708152	-0.479934	-0.435687	8.02486e-09	0.139181	0.000806061	MYBL1
ENSG00000185721	-0.0709038	0.207495	0.138043	0.495713	0.0275114	0.0407837	DRG1
ENSG00000185745	-0.814074	0.337092	0.13873	4.47941e-11	0.333634	0.00183865	IFIT1
ENSG00000185800	-0.242569	-0.172286	-0.0911526	0.00451756	0.11579	0.0429612	DMWD
ENSG00000185803	0.204897	-0.314387	-0.0407521	0.0390754	0.879265	0.0026992	SLC52A2
ENSG00000185909	-0.50977	0.130008	0.209097	2.00425e-06	0.739349	0.195976	KLHDC8B
ENSG00000186350	-0.258999	-0.0271016	0.177	0.00155161	0.32201	0.73732	RXRA
ENSG00000186376	-0.308862	0.0297263	-0.0914762	0.0194487	0.0481924	0.814763	ZNF75D
ENSG00000186480	0.669684	0.314238	0.334403	7.62306e-10	0.446758	0.00550413	INSIG1
ENSG00000186577	0.355467	-0.286962	-0.0392542	0.000729068	0.248109	0.0111047	C6orf1
ENSG00000187098	-0.506159	-0.246996	-0.206443	1.68909e-08	0.437288	0.00499824	MITF
ENSG00000187109	-0.281408	0.146849	0.0389359	4.66712e-05	0.8376	0.032669	NAP1L1
ENSG00000187164	0.0236794	-0.0268395	-0.190003	0.798441	0.0139057	0.773559	SHTN1
ENSG00000187210	0.522813	0.013049	-0.279775	1.55717e-05	0.609106	0.919442	GCNT1
ENSG00000187231	-0.189892	0.367424	0.174311	0.0479114	0.717643	6.18631e-05	SESTD1
ENSG00000187244	-0.278057	-0.200737	0.0091948	0.000198981	0.994386	0.00709794	BCAM
ENSG00000187498	0.462676	-0.272416	-0.137226	6.81005e-10	0.567788	0.000416772	COL4A1
ENSG00000187840	0.693142	-0.435638	-0.173081	1.58888e-10	0.321743	0.000417009	EIF4EBP1
ENSG00000188229	-1.09687	1.14348	0.461359	6.28921e-42	1.34195e-05	6.91899e-54	TUBB4B
ENSG00000188643	0.662384	-0.246287	-0.0266703	3.07457e-19	0.862776	0.00121158	S100A16
ENSG00000189056	0.785521	-0.325615	-0.0484501	1.27004e-14	0.208873	0.00447787	RELN
ENSG00000189159	0.48612	-0.478993	-0.00521386	9.0561e-06	0.668185	9.45719e-05	JPT1
ENSG00000196083	0.566813	-0.234551	-0.289881	1.51063e-06	0.951388	0.0715113	IL1RAP
ENSG00000196205	-0.0659995	-0.235898	0.15741	0.36898	0.0744399	0.00142192	NA
ENSG00000196230	-1.39595	1.30699	0.809635	9.43313e-87	2.25771e-08	1.82471e-80	TUBB
ENSG00000196305	0.17447	-0.270229	-0.157543	0.0241469	0.200658	0.000639573	IARS
ENSG00000196365	0.30317	-0.195142	-0.0893888	0.000192838	0.972752	0.0199697	LONP1
ENSG00000196396	0.24292	-0.198494	-0.104599	0.00302856	0.159149	0.0185394	PTPN1
ENSG00000196449	-0.0276262	-0.359446	-0.269372	0.828759	0.0555891	0.00717201	YRDC
ENSG00000196586	0.0772639	-0.229721	-0.25576	0.379137	0.0157174	0.0107887	MYO6
ENSG00000196743	-0.203837	0.136712	0.193731	0.0254798	0.273807	0.124309	GM2A
ENSG00000196782	-0.187938	0.184617	0.266717	0.15159	0.0492912	0.140788	MAML3
ENSG00000196792	-0.299423	-0.149825	-0.191796	0.00191654	0.0772347	0.116067	STRN3
ENSG00000196865	-0.262281	-0.00255071	-0.0711259	0.0030617	0.0025568	0.976601	NHLRC2
ENSG00000196923	0.678926	-0.407129	-0.121457	2.57917e-20	0.469935	9.19789e-08	PDLIM7
ENSG00000196924	0.270616	-0.521572	-0.228688	5.5158e-05	0.702339	1.01643e-14	FLNA
ENSG00000197070	-0.311398	-0.297547	-0.146222	0.00311719	0.350647	0.00476199	ARRDC1
ENSG00000197081	0.0132561	0.14143	0.162854	0.851909	0.761344	0.0459455	IGF2R
ENSG00000197102	-0.0542723	-0.172665	-0.0409188	0.441559	0.0124242	0.0146432	DYNC1H1
ENSG00000197121	-0.382359	0.19342	0.104208	3.24721e-05	0.745301	0.0279883	PGAP1
ENSG00000197183	-0.550147	0.197645	0.116871	9.63649e-08	0.150028	0.0396399	NOL4L
ENSG00000197283	-0.261381	0.0706152	0.159727	0.00136812	0.609542	0.378553	SYNGAP1
ENSG00000197451	0.562954	-0.359367	-0.126376	2.31679e-10	0.268002	0.000176726	HNRNPAB
ENSG00000197467	0.400447	-0.160497	-0.0500386	4.68108e-08	0.716992	0.0314558	COL13A1
ENSG00000197712	0.223406	-0.282747	-0.217224	0.00205698	0.926534	0.000123214	FAM114A1
ENSG00000197713	-0.176425	-0.228351	-0.139896	0.0728517	0.0278427	0.0211323	RPE
ENSG00000197747	-0.213173	-0.225454	-0.152118	0.00410683	0.858209	0.0024324	S100A10
ENSG00000197774	-0.307024	-0.270249	-0.0586066	0.0150866	0.0597142	0.0320471	EME2
ENSG00000197818	-0.257686	0.140687	0.23978	0.028916	0.499576	0.212625	SLC9A8
ENSG00000197879	0.291544	-0.263807	-0.0429195	5.57629e-05	0.359752	0.000334001	MYO1C
ENSG00000197905	0.464993	-0.47783	-0.330113	0.000545914	0.13691	0.00181907	TEAD4
ENSG00000197982	-0.063443	-0.192572	0.0187258	0.510117	0.0197998	0.0486389	C1orf122
ENSG00000198189	-0.273603	0.386816	0.103359	0.017452	0.798712	0.000310379	HSD17B11
ENSG00000198225	0.579942	-0.309682	0.314233	5.26133e-06	0.127422	0.0306097	NA
ENSG00000198604	0.391176	0.13415	-0.103887	0.000879388	0.0193651	0.269331	BAZ1A
ENSG00000198682	0.817569	-0.212205	-0.190737	4.20468e-29	0.811239	0.00469569	PAPSS2
ENSG00000198695	-0.29096	-0.374089	-0.367854	2.78721e-05	4.79545e-08	7.59914e-08	ND6
ENSG00000198712	-0.0537991	-0.268548	-0.32246	0.423906	1.43526e-05	6.74361e-05	COX2
ENSG00000198727	-0.176782	-0.301165	-0.314809	0.00862262	1.1089e-06	7.83897e-06	CYTB
ENSG00000198743	-0.72725	-0.119782	-0.111842	6.11367e-23	0.040156	0.0969967	SLC5A3
ENSG00000198756	-0.898043	0.359004	0.524823	3.05696e-11	0.196163	0.0019182	COLGALT2
ENSG00000198763	-0.0234541	-0.302987	-0.24753	0.731108	0.00124919	9.71966e-06	ND2
ENSG00000198786	-0.226191	-0.328199	-0.350415	0.000767527	2.18308e-08	1.07928e-06	ND5
ENSG00000198792	0.227714	-0.210108	-0.0266345	0.00259052	0.614812	0.00637609	TMEM184B
ENSG00000198804	-0.257508	-0.304339	-0.311776	0.000118292	6.14579e-07	5.4149e-06	COX1
ENSG00000198840	-0.0758923	-0.254774	-0.215256	0.275656	0.00436764	0.000266153	ND3
ENSG00000198873	0.280563	-0.388594	-0.0992828	0.0217403	0.183654	0.00357159	GRK5
ENSG00000198886	-0.135579	-0.311882	-0.289725	0.0424408	1.00434e-05	3.11918e-06	ND4
ENSG00000198888	-0.121237	-0.196855	-0.113036	0.0749985	0.0177573	0.00387568	ND1
ENSG00000198899	-0.12364	-0.246204	-0.33433	0.0682737	1.11436e-06	0.000288483	ATP6
ENSG00000198911	0.662467	-0.170389	-0.0133764	1.01701e-18	0.598339	0.0275112	SREBF2
ENSG00000198919	-0.513186	0.299351	0.146764	7.17117e-06	0.481141	0.00428047	DZIP3
ENSG00000198938	-0.200916	-0.309146	-0.287221	0.002785	3.42915e-05	4.28678e-06	COX3
ENSG00000198959	0.625314	-0.11031	0.148465	1.5478e-20	0.0723399	0.100772	TGM2
ENSG00000203805	0.520324	-0.262048	0.0672708	3.78517e-09	0.577674	0.00530759	PLPP4
ENSG00000204178	-0.0844773	0.24128	0.209143	0.457196	0.028108	0.0280379	TMEM57
ENSG00000204262	0.169468	-0.208883	-0.248175	0.0276899	0.0185965	0.00772005	COL5A2
ENSG00000204389	-0.650165	-0.154622	-0.196858	6.26015e-07	0.0394361	0.207701	HSPA1A
ENSG00000204498	-0.193704	0.216485	0.386504	0.127147	0.0062949	0.0736201	NFKBIL1
ENSG00000205352	0.133131	0.344858	0.313027	0.324665	0.0362872	0.00892383	PRR13
ENSG00000205356	-0.113015	-0.36256	-0.212594	0.245865	0.119447	0.000287703	TECPR1
ENSG00000205517	-0.344457	0.254596	0.0812414	0.00323612	0.308118	0.0201102	RGL3
ENSG00000205542	0.189392	-0.127466	-0.209284	0.0159381	0.0658595	0.110739	TMSB4X
ENSG00000205758	-0.419992	0.0340296	-0.0835634	9.72598e-05	0.0055387	0.740876	CRYZL1
ENSG00000206538	1.06207	-0.193668	-0.262571	8.43915e-29	0.27875	0.07042	VGLL3
ENSG00000210082	-0.237788	-0.194497	-0.280289	0.000398394	0.000218897	0.00376521	RNR2
ENSG00000211459	-0.290553	-0.175773	-0.386311	6.52708e-05	0.00318418	0.0153877	RNR1
ENSG00000212907	-0.0848596	-0.314649	-0.261021	0.219415	0.000362072	5.77554e-06	ND4L
ENSG00000213352	-0.185917	-0.266938	0.139159	0.0259744	0.178636	0.00149664	NA
ENSG00000213366	-0.706505	0.300878	0.0123969	8.97132e-11	0.852042	0.00222775	GSTM2
ENSG00000213493	0.326205	-0.336242	-0.0910803	0.00368187	0.784381	0.00569699	NA
ENSG00000213553	0.12754	0.00190719	0.176781	0.094036	0.00909351	0.980141	NA
ENSG00000213626	0.195964	-0.481782	-0.26352	0.0152816	0.875404	1.1432e-08	LBH
ENSG00000213763	0.495581	-0.725267	-0.258792	1.32442e-06	0.760714	6.51492e-10	NA
ENSG00000213867	0.333993	-0.334181	0.478551	0.00295731	0.00150328	0.00606342	NA
ENSG00000214021	-0.398212	0.116287	0.0891023	8.35497e-06	0.00618423	0.176794	TTLL3
ENSG00000214063	-0.160721	-0.182126	0.00147693	0.0255334	0.885666	0.0114782	TSPAN4
ENSG00000214174	-0.438664	0.2999	-0.0308998	0.000943687	0.771511	0.0133387	AMZ2P1
ENSG00000214391	-1.351	1.63064	0.879699	2.63228e-15	0.0746846	1.8434e-44	NA
ENSG00000214548	-0.150974	0.140945	0.0236738	0.0268514	0.000277842	0.0383442	MEG3
ENSG00000214706	0.262302	-0.35292	-0.137736	0.0138358	0.813044	0.0020175	IFRD2
ENSG00000214944	0.123258	-0.199694	-0.245408	0.158353	0.446562	0.0259634	ARHGEF28
ENSG00000215030	0.0819689	-0.164431	0.158469	0.255032	0.00456476	0.023396	NA
ENSG00000215057	-0.321764	0.257582	-0.112791	0.00321295	0.833699	0.0123614	NA
ENSG00000215712	0.214005	0.322006	0.309368	0.055961	0.0202888	0.00368857	TMEM242
ENSG00000218582	-0.0578724	-0.0493988	0.331977	0.539131	0.0127002	0.600494	NA
ENSG00000221963	-1.28525	0.205839	-0.0431972	2.75966e-28	0.916169	0.0374973	APOL6
ENSG00000222009	-0.238051	0.00563476	0.03532	0.0142127	0.00374638	0.952763	BTBD19
ENSG00000224596	-0.316365	0.363947	0.104926	0.00960743	0.00143881	0.00128788	ZMIZ1-AS1
ENSG00000225156	-0.504356	0.195893	0.0578031	4.40404e-07	0.376785	0.0366308	NA
ENSG00000225830	-0.465491	-0.0485659	-0.219792	2.52914e-10	0.00304024	0.503485	ERCC6
ENSG00000226360	0.200852	0.0937626	0.218866	0.053282	0.0467062	0.373072	NA
ENSG00000226415	0.224018	-0.197562	-0.102841	0.00148618	0.881251	0.00547553	NA
ENSG00000226608	-0.204668	0.244264	0.170195	0.0108333	0.134346	0.00188059	NA
ENSG00000226742	-0.344341	0.268025	0.228344	0.0106431	0.610471	0.031992	HSBP1L1
ENSG00000227500	0.0415483	-0.0254594	0.207488	0.624348	0.0309456	0.765456	SCAMP4
ENSG00000228253	-0.0644888	-0.220493	-0.277118	0.377456	2.41071e-05	0.00269827	ATP8
ENSG00000230581	0.202506	-0.385713	-0.0637279	0.0702939	0.0296975	0.00132042	NA
ENSG00000232368	-0.119155	-0.000866174	0.209096	0.228525	0.00707755	0.992951	NA
ENSG00000233016	-0.244013	0.118924	0.0702292	0.010805	0.0235213	0.20044	SNHG7
ENSG00000235162	0.50003	-0.443712	-0.320543	3.59314e-09	0.508041	1.03618e-06	C12orf75
ENSG00000235587	-0.117059	0.148883	0.134991	0.0930252	0.0325565	0.0320455	NA
ENSG00000235847	-0.0147395	-0.189041	-0.192806	0.872672	0.583352	0.0432034	NA
ENSG00000236480	-0.304876	-0.419458	0.037543	0.000394559	0.561013	1.39348e-06	NA
ENSG00000236811	-0.0797998	-0.37829	0.216212	0.320646	0.000726874	3.86944e-06	NA
ENSG00000239672	0.648339	-0.486229	-0.333354	1.26574e-09	0.617532	6.32794e-05	NME1
ENSG00000240476	0.332919	-0.294049	-0.0677304	0.00580645	0.399612	0.024537	NA
ENSG00000242086	-0.497407	0.0429108	-0.244879	0.000187314	0.0177122	0.730405	SDHAP2
ENSG00000242265	-0.618061	-0.0824616	-0.157777	7.92688e-17	0.80594	0.257066	PEG10
ENSG00000244509	-0.289981	0.329319	0.329346	0.0331767	0.0829776	0.00899964	APOBEC3C
ENSG00000244560	-0.262568	-0.0573707	-0.0685687	0.0270894	0.00700271	0.62151	LOC155060
ENSG00000245060	-0.283737	0.365733	0.1342	0.0381256	0.551057	0.00376058	LINC00847
ENSG00000245532	-0.0463497	0.299633	0.0667535	0.499574	0.000121201	1.21375e-05	NEAT1
ENSG00000248527	-0.082597	-0.303692	-0.368111	0.286113	0.000725303	0.0001067	NA
ENSG00000249489	-0.16571	-0.290038	0.159761	0.0212525	0.0297448	5.95062e-05	NA
ENSG00000249992	2.33122	-0.454126	-0.286638	1.11882e-72	0.564049	0.0149234	TMEM158
ENSG00000250510	-0.939504	0.276336	0.380169	1.62894e-18	0.452013	0.00357481	GPR162
ENSG00000251562	-0.214341	0.246898	-0.293107	0.00382734	8.89104e-06	0.000731162	MALAT1
ENSG00000253276	0.27342	-0.213227	-0.142152	0.00489791	0.869252	0.0365198	CCDC71L
ENSG00000253341	-0.214313	0.1715	0.141035	0.0088321	0.679625	0.0324122	NA
ENSG00000253506	-0.365965	0.283247	0.030526	0.000358	0.866236	0.00334203	NACA2
ENSG00000253729	0.293987	-0.225456	-0.138657	0.000148576	0.0450575	0.0045818	PRKDC
ENSG00000253797	-0.449069	-0.28356	-0.0863176	6.21857e-05	0.0765224	0.0101303	UTP14C
ENSG00000253873	-0.321365	0.218584	0.236396	1.79247e-05	0.0441033	0.00296906	PCDHGA11
ENSG00000254221	-0.245172	0.100155	0.240741	0.0453109	0.863879	0.39502	PCDHGB1
ENSG00000256043	-0.286679	0.262836	0.117997	0.00182514	0.303846	0.00288623	CTSO
ENSG00000256235	0.658142	0.249971	0.280945	2.21746e-15	0.00600261	0.00328359	SMIM3
ENSG00000257354	-0.212787	0.181412	0.0635917	0.0244294	0.0058575	0.0476547	NA
ENSG00000258890	-0.435696	0.349817	0.0448342	5.025e-05	0.715648	0.000434163	CEP95
ENSG00000259439	-0.545879	0.123941	0.14532	6.21243e-13	0.553692	0.0935705	LINC01833
ENSG00000259706	-0.228439	0.111223	-0.176374	0.0028979	0.122621	0.141631	HSP90B2P
ENSG00000261801	-0.598022	-0.255335	-0.075743	6.22087e-08	0.390475	0.0165568	LOXL1-AS1
ENSG00000264112	-0.440435	0.213602	-0.0317989	9.48687e-05	0.00344233	0.0424135	NA
ENSG00000265808	0.221765	-0.101115	-0.189502	0.00856592	0.159106	0.241382	SEC22B
ENSG00000266028	0.227267	0.208654	0.165575	0.0142644	0.998719	0.0248981	SRGAP2
ENSG00000272888	-0.231556	0.238522	0.0622373	0.0302119	0.37073	0.0193844	NA
ENSG00000273559	-0.39096	-0.0789167	-0.0497524	0.000981109	0.0285839	0.490939	CWC25
ENSG00000273611	-0.00118554	0.274038	0.227378	0.99195	0.355947	0.016336	ZNHIT3
ENSG00000275700	-0.331077	0.246497	0.151375	5.92626e-05	0.413889	0.00202266	AATF
ENSG00000275832	-0.251879	-0.331419	-0.095165	0.00119782	0.652935	2.22886e-05	ARHGAP23
ENSG00000277443	0.211945	-0.253772	-0.162585	0.00421398	0.657676	0.000759991	MARCKS
ENSG00000277998	-0.504762	0.0214288	-0.181245	7.67937e-06	0.00156671	0.840698	NA
ENSG00000281649	-0.155226	-0.0161977	-0.16403	0.0492058	0.093534	0.836409	EBLN3P

## Sheet: Fig. 1c-d
Low dose and high dose 24h
ENSGID	CA4.100nM	CA4.1nM	PTX.300nM	PTX.3nM	logCPM	p.CA4.100nM	p.CA4.1nM	p.PTX.300nM	p.PTX.3nM	GeneName
ENSG00000001617	-1.14953	-0.0345353	-0.283472	-0.0608809	8.62544	8.97016e-58	0.619283	4.9173e-05	0.381259	SEMA3F
ENSG00000002587	0.639951	-0.176554	-0.36582	-0.0200936	4.56679	6.02958e-08	0.176276	0.00631183	0.875191	HS3ST1
ENSG00000003756	-0.330411	-0.0954887	0.20279	0.0769176	7.0611	2.19867e-05	0.215052	0.00769644	0.314288	RBM5
ENSG00000005486	-0.348716	0.237778	0.0520884	0.209146	6.64737	4.33438e-05	0.00381918	0.530881	0.0110639	RHBDD2
ENSG00000005812	-0.216958	-0.0967774	-0.0383975	-0.188858	5.90487	0.0180857	0.287405	0.671635	0.039348	FBXL3
ENSG00000005882	-0.399562	0.141189	-0.0232776	0.206624	4.98249	0.000246945	0.170788	0.824346	0.0435998	PDK2
ENSG00000005884	0.157681	0.0161422	-0.174268	0.0188338	11.9909	0.0184932	0.809455	0.00928803	0.778451	ITGA3
ENSG00000006062	-0.0641607	-0.0152143	-0.264515	-0.249702	4.64789	0.579722	0.895106	0.0261454	0.0352739	MAP3K14
ENSG00000006327	1.24733	0.0247255	-0.54098	-0.264257	7.5516	5.23117e-60	0.75581	4.89104e-11	0.00107215	TNFRSF12A
ENSG00000006432	0.464891	-0.0381899	-0.275272	-0.0523765	4.55003	6.62019e-05	0.757769	0.0310775	0.672752	MAP3K9
ENSG00000007080	0.505597	0.0119916	-0.29781	-0.0617285	5.59934	5.60622e-08	0.901776	0.00294569	0.52796	CCDC124
ENSG00000007372	-0.843816	-0.166067	-0.12149	0.0842151	6.84525	3.36316e-25	0.0335982	0.119344	0.275533	PAX6
ENSG00000007392	-0.22789	-0.201229	0.14419	-0.0490541	5.98036	0.0110761	0.0247505	0.0987742	0.579546	LUC7L
ENSG00000008277	-0.311854	-0.0254971	0.180508	0.257963	4.43382	0.00998887	0.827701	0.114822	0.0229004	ADAM22
ENSG00000008513	-0.334131	0.0372264	0.192465	0.141699	6.46804	7.09454e-05	0.650563	0.0181789	0.0827668	ST3GAL1
ENSG00000010278	0.457552	-0.0508055	-0.23572	-0.0702521	7.72293	4.82777e-10	0.496074	0.00172064	0.346889	CD9
ENSG00000010704	-0.347598	0.0525347	0.226121	0.0530449	4.64953	0.0039671	0.648469	0.04552	0.645174	HFE
ENSG00000011009	0.179087	0.173454	0.0927736	0.281	6.036	0.0485236	0.0564225	0.310813	0.00182971	LYPLA2
ENSG00000011295	0.282506	0.167418	0.210493	0.16662	5.97706	0.00168286	0.0652684	0.0200961	0.0665335	TTC19
ENSG00000011426	1.00144	0.017611	-0.375866	-0.247297	5.40478	2.73249e-25	0.867268	0.000637975	0.0225104	ANLN
ENSG00000012822	-0.248526	-0.0706497	0.153454	0.0387569	7.40262	0.00097176	0.345223	0.0388576	0.603128	CALCOCO1
ENSG00000013016	0.398594	0.0275102	-0.341182	-0.104569	6.10977	5.30662e-06	0.759935	0.000240124	0.250368	EHD3
ENSG00000013306	0.15438	0.00210301	-0.1968	-0.0199239	6.96577	0.0488186	0.978759	0.0137161	0.801048	SLC25A39
ENSG00000013375	0.208523	-0.108192	-0.204377	-0.215015	6.06925	0.0188945	0.235155	0.0261794	0.01935	PGM3
ENSG00000013441	-0.590949	-0.23681	-0.0420654	-0.144527	6.8178	1.69814e-13	0.00258725	0.588967	0.0646153	CLK1
ENSG00000014914	-0.446949	-0.0373454	0.239559	0.036596	5.57359	2.27332e-06	0.68258	0.00737921	0.686785	MTMR11
ENSG00000019144	-0.173911	-0.039655	-0.250101	-0.103195	7.18612	0.0256494	0.608813	0.00140599	0.184198	PHLDB1
ENSG00000020577	0.544541	-0.168201	-0.458796	-0.205135	4.16787	2.21835e-05	0.232778	0.00178381	0.147497	SAMD4A
ENSG00000026025	-0.388209	-0.0321955	-0.137976	-0.0148509	12.1932	6.85893e-09	0.630119	0.0391143	0.824206	VIM
ENSG00000026103	0.596447	0.204164	0.29242	-0.0825652	4.33497	8.92244e-06	0.149096	0.0366731	0.574533	FAS
ENSG00000026950	-0.542	0.058272	0.277969	0.102603	4.28235	1.67489e-05	0.618908	0.0150374	0.37855	BTN3A1
ENSG00000029153	0.74568	-0.0579974	-0.325904	-0.193238	5.78167	6.87128e-16	0.557523	0.00133879	0.0537288	ARNTL2
ENSG00000034510	0.210111	0.0414758	-0.193685	-0.0335154	10.2692	0.00198719	0.541969	0.00449024	0.622348	TMSB10
ENSG00000035403	0.418863	-0.10733	-0.426656	-0.293319	10.871	5.7224e-10	0.11268	3.32948e-10	1.51054e-05	VCL
ENSG00000037042	-0.392872	-0.0202787	0.406635	0.288597	4.53815	0.00152545	0.864247	0.000322156	0.0116681	TUBG2
ENSG00000039560	0.506348	-0.0287775	-0.193541	-0.1444	8.69518	5.93574e-13	0.684656	0.00651763	0.0420935	RAI14
ENSG00000044574	0.162552	-0.0580971	-0.220586	-0.062482	9.49125	0.0192628	0.404408	0.00159983	0.369893	HSPA5
ENSG00000047346	-0.217973	0.0223989	0.318196	0.0899662	5.34513	0.0364943	0.825931	0.00132003	0.373774	FAM214A
ENSG00000047644	0.44473	0.0959481	0.0445085	0.1659	6.73861	5.26841e-08	0.249891	0.59481	0.0457022	WWC3
ENSG00000047849	0.326724	-0.0397751	-0.22208	-0.122643	8.85591	3.28458e-06	0.573458	0.00174878	0.0831234	MAP4
ENSG00000048052	0.691719	-0.156487	-0.294925	-0.141309	5.27618	1.44477e-11	0.161821	0.0095078	0.205575	HDAC9
ENSG00000049239	0.178929	0.177183	0.109973	0.144396	7.15157	0.022344	0.0237901	0.162023	0.065819	H6PD
ENSG00000050820	-0.462808	0.0154015	-0.187235	-0.0601504	7.06261	4.91416e-09	0.841959	0.0163902	0.437682	BCAR1
ENSG00000051108	-0.0763753	0.101443	0.233093	0.215769	6.34713	0.378417	0.236669	0.00611394	0.0112038	HERPUD1
ENSG00000051128	-0.430586	0.00250265	-0.00568414	0.182969	5.94523	2.1853e-06	0.97729	0.948502	0.0349985	HOMER3
ENSG00000054654	0.179242	-0.242853	-0.201314	-0.213642	4.93888	0.0788694	0.0228245	0.0581725	0.0444998	SYNE2
ENSG00000055163	-0.069786	0.220072	0.221827	0.172214	5.48048	0.487486	0.0246358	0.0235552	0.0799209	CYFIP2
ENSG00000057294	0.351006	-0.00685349	-0.305396	-0.164602	5.1076	0.00214927	0.954217	0.0137197	0.176001	PKP2
ENSG00000058056	0.359438	0.0508605	0.354833	0.195747	5.21992	0.000571917	0.63721	0.000692102	0.0652921	USP13
ENSG00000058063	-0.175379	-0.019328	-0.0548924	-0.169861	6.4182	0.040941	0.820031	0.519358	0.0478295	ATP11B
ENSG00000058673	-0.183853	-0.183655	-2.49441e-05	-0.0712663	6.99601	0.0197554	0.019979	0.999745	0.363743	ZC3H11A
ENSG00000059573	0.0295117	0.0155977	-0.261854	-0.209975	7.66972	0.697218	0.837252	0.000660292	0.00617066	ALDH18A1
ENSG00000059804	0.03572	-0.0890327	-0.221334	-0.228556	5.53595	0.700295	0.343107	0.0199122	0.0162159	SLC2A3
ENSG00000060656	0.194638	0.265013	0.116558	0.338125	4.39465	0.109878	0.0284241	0.344006	0.00479111	PTPRU
ENSG00000060982	0.206161	-0.0753555	-0.249096	-0.191851	7.59444	0.006334	0.323932	0.00122086	0.0124723	BCAT1
ENSG00000061273	-0.239198	-0.0676061	-0.189532	-0.0206331	7.40327	0.00155312	0.368008	0.0120451	0.783117	HDAC7
ENSG00000063438	-0.788482	-0.040332	0.14168	0.238956	6.27351	2.97192e-19	0.627978	0.0853415	0.00351159	AHRR
ENSG00000064042	0.291157	0.0670354	-0.191785	-0.144415	8.58547	4.23151e-05	0.347988	0.00764783	0.044273	LIMCH1
ENSG00000064225	0.475106	-0.00570929	-0.128996	-0.273448	4.33417	0.000111588	0.96515	0.331621	0.0432455	ST3GAL6
ENSG00000064607	-0.236419	-0.15914	-0.0911977	-0.0651382	7.12717	0.00231446	0.0396738	0.237081	0.397658	SUGP2
ENSG00000064687	-0.729662	-0.0243949	0.0990553	0.266352	5.58843	1.71513e-13	0.792561	0.280835	0.00328685	ABCA7
ENSG00000065809	0.299146	-0.0407045	-0.103037	-0.244913	6.23933	0.000553117	0.6468	0.248582	0.00666806	FAM107B
ENSG00000065911	0.653479	0.0313108	-0.431887	-0.251855	4.92637	5.32065e-09	0.794512	0.000703544	0.0429764	MTHFD2
ENSG00000067057	0.228796	0.0620137	-0.234282	-0.139322	8.35181	0.00131832	0.38569	0.00114737	0.0524636	PFKP
ENSG00000067082	0.355135	-0.0277295	-0.196429	-0.250269	6.09139	4.38326e-05	0.75647	0.0302944	0.00597026	KLF6
ENSG00000067365	0.362764	0.159844	0.0845057	0.256818	4.32721	0.00419659	0.219443	0.52048	0.0457424	METTL22
ENSG00000067560	-0.201341	-0.00728174	-0.170889	-0.102646	9.32619	0.00371211	0.916188	0.0137621	0.138482	RHOA
ENSG00000067836	-0.379651	0.0367235	0.164048	0.240965	5.14021	0.000366608	0.719258	0.104159	0.0161231	ROGDI
ENSG00000068028	0.347718	0.0754062	-0.414271	-0.251768	4.1885	0.00633692	0.56793	0.00330985	0.0677015	RASSF1
ENSG00000068137	-0.37087	0.03861	0.139509	0.228888	4.86484	0.00102356	0.720834	0.192099	0.0306547	PLEKHH3
ENSG00000068305	-0.934047	0.0280487	0.159708	0.0463984	8.52337	5.82408e-38	0.690529	0.023104	0.509993	MEF2A
ENSG00000069399	-0.568627	0.0658134	0.041575	0.220075	5.40861	6.22822e-08	0.504571	0.674196	0.0235996	BCL3
ENSG00000069535	-0.778159	0.127509	0.311928	0.178627	4.87695	1.32411e-10	0.242262	0.00355809	0.0994533	MAOB
ENSG00000070404	1.35056	-0.0254344	-0.281753	-0.118841	5.81876	1.25036e-52	0.794715	0.00495433	0.228078	FSTL3
ENSG00000070614	0.333213	0.0499839	-0.153591	-0.00857206	8.0009	4.98791e-06	0.496874	0.0381572	0.907406	NDST1
ENSG00000070778	0.396817	-0.0874752	-0.253891	-0.281297	5.06534	0.00019477	0.436184	0.0267163	0.0143206	PTPN21
ENSG00000071127	0.414911	0.0644363	-0.337247	-0.172526	9.25264	3.02655e-09	0.359247	1.976e-06	0.0145518	WDR1
ENSG00000071655	0.248333	0.00183926	-0.280433	-0.00680423	6.08731	0.004453	0.983507	0.00207442	0.939072	MBD3
ENSG00000071967	-0.794071	-0.00534368	0.150483	0.0624662	9.88585	1.09912e-30	0.937423	0.026903	0.358507	CYBRD1
ENSG00000072110	0.710955	0.0546258	-0.411477	-0.176514	9.0302	6.12038e-24	0.441796	1.05004e-08	0.0134257	ACTN1
ENSG00000072134	-0.315773	-0.0235551	-0.204676	-0.123084	5.33831	0.00142448	0.807003	0.0369737	0.205832	EPN2
ENSG00000072274	0.511549	-0.131307	-0.150048	-0.258893	7.43162	1.9214e-11	0.0934633	0.0555574	0.00101755	TFRC
ENSG00000072832	-0.258044	-0.216776	0.0837902	0.0978349	5.20227	0.0116982	0.033688	0.39807	0.322785	CRMP1
ENSG00000072958	0.329795	-0.0192687	-0.280029	-0.128066	6.5042	6.67241e-05	0.81972	0.00115155	0.132637	AP1M1
ENSG00000073008	1.40389	0.026007	-0.187407	-0.0914446	6.58917	2.66181e-63	0.7739	0.0420421	0.316943	PVR
ENSG00000073060	0.266991	0.123007	-0.0254073	0.181388	5.8683	0.00352126	0.184311	0.786628	0.0491365	SCARB1
ENSG00000073111	0.670431	0.21122	-0.2999	-0.098341	4.9619	2.75271e-10	0.0581572	0.0112715	0.394206	MCM2
ENSG00000073921	-0.241763	-0.0514199	-0.0228231	-0.153266	8.90889	0.000607826	0.464247	0.745193	0.0294746	PICALM
ENSG00000074219	-0.15481	0.11381	0.290729	0.256303	5.14902	0.139799	0.265319	0.00381828	0.0109652	TEAD2
ENSG00000074416	0.733664	-0.106176	-0.421379	-0.247951	5.51959	6.22227e-15	0.294873	5.80409e-05	0.0158788	MGLL
ENSG00000074800	0.188704	0.0376219	-0.250291	-0.108594	11.6502	0.00492023	0.575075	0.000196259	0.105826	ENO1
ENSG00000075420	0.676677	-0.0332487	-0.0518089	-0.168972	7.49612	1.3913e-19	0.663907	0.498786	0.0281591	FNDC3B
ENSG00000075624	0.504081	-0.003256	-0.711069	-0.338314	11.2322	8.73435e-14	0.961576	1.94232e-25	6.0199e-07	ACTB
ENSG00000075826	-0.364172	-0.189443	0.0679574	0.0549185	6.68346	6.16674e-06	0.0176023	0.388208	0.485704	SEC31B
ENSG00000076003	0.8688	-0.0872095	-0.38315	-0.286929	4.94881	2.36718e-16	0.457549	0.00165415	0.0170022	MCM6
ENSG00000076043	0.526871	-0.0734311	-0.316569	-0.321498	5.65387	9.59848e-09	0.447286	0.00137719	0.00115421	REXO2
ENSG00000078018	0.344	-0.0767984	-0.173399	-0.220813	5.79866	0.000326666	0.44059	0.0847234	0.0287829	MAP2
ENSG00000078674	-0.176143	-0.0802612	0.167306	-0.022395	7.00046	0.025933	0.308109	0.0316305	0.775457	PCM1
ENSG00000079308	0.243304	-0.0194837	-0.341519	-0.0606721	6.5169	0.0036371	0.819015	8.99402e-05	0.477321	TNS1
ENSG00000079313	0.337648	0.224742	0.0989821	0.200004	4.93917	0.0027276	0.0491774	0.393328	0.0807863	REXO1
ENSG00000079482	-0.804258	-0.013438	0.225435	0.108534	6.37212	1.47794e-20	0.869651	0.00528867	0.181926	OPHN1
ENSG00000080608	0.297467	0.0745301	-0.155454	-0.283456	4.52298	0.0171297	0.561864	0.240442	0.0351381	PUM3
ENSG00000080824	0.178216	-0.06993	-0.097499	-0.145429	9.94126	0.00911216	0.307232	0.154721	0.0338764	HSP90AA1
ENSG00000081923	0.492273	0.0656616	-0.140952	-0.177184	6.58739	4.27958e-09	0.445882	0.107067	0.0432371	ATP8B1
ENSG00000082781	0.301344	0.0370866	-0.159976	-0.0583738	10.4709	8.36789e-06	0.5837	0.0182583	0.38867	ITGB5
ENSG00000083067	-1.36961	-0.303021	-0.332142	-0.260405	4.18525	1.87703e-23	0.0111682	0.00561632	0.0283425	TRPM3
ENSG00000083857	0.0557951	-0.172836	-0.500043	-0.30506	7.42661	0.475847	0.0291277	6.04589e-10	0.000131955	FAT1
ENSG00000084774	0.253142	-0.00138016	-0.197703	-0.0388903	6.28302	0.00320998	0.987417	0.0260923	0.657576	CAD
ENSG00000085117	-0.394422	0.169602	0.0921333	0.211156	5.28614	0.000204365	0.0911591	0.362557	0.0346956	CD82
ENSG00000085491	-0.166903	-0.102327	-0.192909	-0.211078	6.05537	0.062211	0.251036	0.031759	0.0188926	SLC25A24
ENSG00000085871	-0.376337	0.232565	0.24414	0.272926	4.28116	0.00423123	0.0568052	0.0453691	0.0246508	MGST2
ENSG00000087086	-0.181816	0.137939	0.19635	0.16134	10.0925	0.00767385	0.0425765	0.00388796	0.0176855	FTL
ENSG00000087253	-0.476821	-0.0507396	-0.190657	-0.170243	8.47508	2.1237e-11	0.471441	0.00698681	0.0159441	LPCAT2
ENSG00000087303	-0.387668	-0.0175784	-0.0197067	0.178765	7.04407	8.63295e-07	0.820268	0.799018	0.0198002	NID2
ENSG00000088280	-0.546479	0.0887607	0.217006	0.251267	4.83065	1.0233e-06	0.395433	0.0354247	0.0144665	ASAP3
ENSG00000088325	1.02254	0.00656254	0.423904	0.0221461	5.21351	3.56659e-23	0.95425	0.000105838	0.846173	TPX2
ENSG00000088340	-0.268817	-0.203364	0.0284173	-0.0316423	7.36378	0.000404289	0.00731562	0.705267	0.674249	FER1L4
ENSG00000088448	-0.199728	-0.275108	0.111217	0.0399934	5.87586	0.0240268	0.00202717	0.19917	0.645764	ANKRD10
ENSG00000088826	0.20857	0.243882	0.355375	0.37054	4.33392	0.0923668	0.0484908	0.0035921	0.0023336	SMOX
ENSG00000089154	0.257594	-0.0899214	-0.215422	-0.1777	7.24004	0.000856242	0.252225	0.00644619	0.0242829	GCN1
ENSG00000090530	0.737014	-0.00926221	-0.453784	-0.345504	7.03894	2.91914e-21	0.908368	4.16022e-08	2.57583e-05	P3H2
ENSG00000090686	-0.20331	-0.181505	-0.0809434	-0.197498	6.24793	0.0170458	0.0330937	0.338785	0.020532	USP48
ENSG00000091164	-0.395332	0.134964	0.24182	0.0323499	6.4773	2.77528e-06	0.098213	0.00289114	0.693524	TXNL1
ENSG00000091986	0.265113	0.0285537	-0.171256	-0.228814	10.5429	9.28852e-05	0.674084	0.0118058	0.000773409	CCDC80
ENSG00000092820	-0.2049	-0.0311037	-0.306001	-0.156073	8.04398	0.00515562	0.669543	3.18721e-05	0.0329009	EZR
ENSG00000092841	0.322727	-0.0250025	-0.389902	-0.215876	9.47613	2.8096e-06	0.717579	2.09742e-08	0.00184692	MYL6
ENSG00000092871	-0.252966	0.0554248	-0.233715	-0.113556	4.55844	0.0308086	0.624416	0.046037	0.325062	RFFL
ENSG00000095319	0.326756	-0.187373	-0.299461	-0.0975705	6.27838	0.000159703	0.0372758	0.000979892	0.274585	NUP188
ENSG00000095380	0.599951	0.0763064	-0.341986	-0.128358	5.77936	5.4066e-11	0.424147	0.000577205	0.186863	NANS
ENSG00000095383	0.0770848	-0.0164532	-0.417708	-0.297529	7.24215	0.326891	0.835113	2.42607e-07	0.000210023	TBC1D2
ENSG00000095564	0.0585767	-0.192912	-0.053188	-0.16567	7.15931	0.446466	0.0132675	0.49192	0.0331736	BTAF1
ENSG00000095906	0.196205	0.242651	-0.0335926	0.112209	5.42089	0.0493373	0.0147602	0.742518	0.265281	NUBP2
ENSG00000096696	0.478622	-0.152119	-0.186097	-0.136069	6.40112	1.01234e-08	0.0807382	0.0331498	0.117749	DSP
ENSG00000097007	0.190517	0.113155	-0.148838	0.0129997	8.06877	0.00892078	0.121276	0.0432515	0.85911	ABL1
ENSG00000099194	0.295544	0.0647797	0.141218	0.11099	8.51226	3.1227e-05	0.363495	0.0472769	0.119112	SCD
ENSG00000099219	-0.0151392	0.186311	0.250104	0.164081	5.94801	0.86937	0.0399357	0.00560464	0.0708408	ERMP1
ENSG00000099260	-0.936433	-0.0085421	0.329889	-0.0260994	4.26998	2.82251e-13	0.940491	0.00277923	0.819884	PALMD
ENSG00000099337	0.5019	-0.0124467	-0.253014	-0.142664	5.41293	1.38188e-06	0.909706	0.0249492	0.200013	KCNK6
ENSG00000099622	-0.364504	-5.06454e-06	0.160671	0.0979125	8.93385	2.03151e-07	0.999942	0.020819	0.159262	CIRBP
ENSG00000099814	0.0660866	-0.0137837	-0.257035	-0.17079	6.50506	0.433584	0.871056	0.0029409	0.0466235	CEP170B
ENSG00000100003	0.547464	0.165576	-0.0370236	0.138394	6.90838	4.81733e-12	0.0401618	0.650131	0.0867197	SEC14L2
ENSG00000100100	0.38743	0.11355	0.165269	0.279293	4.65471	0.000652579	0.333458	0.156998	0.0153075	PIK3IP1
ENSG00000100106	-0.452455	0.0429008	-0.15336	0.0483584	8.57364	2.04347e-10	0.541993	0.0299205	0.491785	TRIOBP
ENSG00000100139	0.332921	0.103142	-0.180639	-0.023449	6.19589	8.9734e-05	0.232326	0.0405465	0.787799	MICALL1
ENSG00000100196	0.39782	-0.022176	-0.18463	-0.188289	6.28638	3.47348e-06	0.801737	0.0390731	0.0352902	KDELR3
ENSG00000100201	-0.218091	-0.154875	0.0648545	-0.00353436	9.72383	0.00143506	0.0235058	0.341854	0.958708	DDX17
ENSG00000100243	0.140616	0.0717554	-0.22769	-0.024784	8.69415	0.0462053	0.309724	0.00136602	0.726179	CYB5R3
ENSG00000100280	0.215769	0.00949258	-0.236172	-0.0388493	6.70424	0.00890086	0.909579	0.00546267	0.643058	AP1B1
ENSG00000100297	1.09553	-0.166397	-0.463022	-0.100555	4.83903	1.66082e-25	0.165741	0.000203964	0.398374	MCM5
ENSG00000100321	-0.0260255	0.240178	0.222777	0.40522	4.333	0.83299	0.0448769	0.0635075	0.000560797	SYNGR1
ENSG00000100345	0.376024	-0.00446421	-0.176792	-0.0176661	10.7688	2.71929e-08	0.947425	0.00911428	0.794148	MYH9
ENSG00000100401	0.734527	0.00834354	-0.202046	-0.080418	6.6197	1.03767e-18	0.92356	0.022239	0.358098	RANGAP1
ENSG00000100522	0.275712	-0.037723	-0.147356	-0.274321	4.7267	0.0200181	0.759564	0.238554	0.030687	GNPNAT1
ENSG00000100823	-0.203714	0.145617	0.206935	0.194268	7.47614	0.0072101	0.0516985	0.00560588	0.00932118	APEX1
ENSG00000100883	0.0853025	-0.133578	-0.194157	-0.182909	6.15229	0.333053	0.136487	0.0313422	0.0422339	SRP54
ENSG00000100934	-0.0174982	-0.0189202	-0.223263	-0.177807	7.86264	0.812973	0.798194	0.00275239	0.016875	SEC23A
ENSG00000100994	-0.38992	-0.066395	-0.1673	0.0136114	9.15018	2.23037e-08	0.338071	0.0159617	0.844126	PYGB
ENSG00000101079	-0.293864	0.122195	0.223725	0.164912	5.87127	0.00141907	0.170491	0.0114963	0.0634607	NDRG3
ENSG00000101166	-0.272874	-0.25217	-0.116525	-0.00811127	5.33585	0.0070404	0.0127007	0.24336	0.934549	PRELID3B
ENSG00000101335	0.677548	0.0355668	-0.411077	-0.165949	7.9118	3.74235e-20	0.63534	7.62168e-08	0.0281312	MYL9
ENSG00000101608	0.34554	-0.0139017	-0.246448	-0.15106	7.17771	1.07555e-05	0.86191	0.00235106	0.0606551	MYL12A
ENSG00000101745	-0.401009	-0.0779411	0.0438657	-0.189946	5.58488	3.17708e-05	0.405511	0.636341	0.0446923	ANKRD12
ENSG00000101751	-0.197019	-0.050414	0.195407	-0.0556247	5.84495	0.0326493	0.580424	0.0290234	0.54202	POLI
ENSG00000101752	-0.185381	0.0184548	0.182024	0.0448138	6.52476	0.0282117	0.824946	0.0276205	0.590528	MIB1
ENSG00000101871	-0.427635	5.51486e-05	-0.183926	-0.120561	6.56831	5.62736e-07	0.99947	0.0287553	0.149793	MID1
ENSG00000101935	-0.0816093	-0.330007	-0.415008	-0.29482	4.26085	0.533223	0.0149352	0.00249511	0.028859	AMMECR1
ENSG00000101986	-0.446393	0.102017	-0.317603	-0.0138503	4.37218	0.000544979	0.39819	0.0125999	0.909919	ABCD1
ENSG00000102081	-0.340804	-0.232088	-0.00231069	-0.0401151	5.37894	0.000717035	0.0200312	0.981123	0.682085	FMR1
ENSG00000102144	0.20111	-0.018127	-0.206867	-0.197897	10.0264	0.00324185	0.791102	0.00256324	0.00390643	PGK1
ENSG00000102241	-0.336321	-0.13776	-0.036635	-0.182422	5.83337	0.00033863	0.135705	0.689191	0.0490112	HTATSF1
ENSG00000102401	-0.315292	-0.164907	-0.0594613	-0.18814	6.57648	0.000116224	0.0420772	0.460981	0.020544	ARMCX3
ENSG00000102908	-0.462622	-0.156955	0.0597528	0.0978144	6.96596	6.28357e-09	0.0451637	0.441092	0.206365	NFAT5
ENSG00000103066	0.381534	0.173403	0.0251637	0.168701	6.25596	8.62468e-06	0.0462863	0.774846	0.0525675	PLA2G15
ENSG00000103145	-0.252351	0.169935	-0.146361	0.00981592	7.03467	0.00138242	0.0280566	0.0623959	0.899738	HCFC1R1
ENSG00000103257	0.692991	0.192695	-0.241215	-0.12713	7.25661	1.09343e-16	0.0252175	0.00667076	0.148907	SLC7A5
ENSG00000103260	-0.254577	0.0514658	-0.237736	-0.0103703	7.60428	0.000614131	0.484218	0.00138126	0.888113	METRN
ENSG00000103335	0.204632	-0.0369238	-0.23027	-0.00907585	7.84169	0.0053482	0.618023	0.00202089	0.90235	PIEZO1
ENSG00000103642	-0.0344138	-0.16635	-0.299478	-0.422622	4.26245	0.784006	0.193356	0.0214397	0.00138848	LACTB
ENSG00000103647	0.100644	0.0795168	0.235056	0.204522	5.96769	0.265436	0.380253	0.00869812	0.0226704	CORO2B
ENSG00000103876	-0.075205	0.135135	0.197297	0.246823	6.22952	0.385801	0.11419	0.0206188	0.00365507	FAH
ENSG00000103966	0.749039	0.0424752	-0.437469	-0.130159	4.94283	1.89563e-11	0.725301	0.000661351	0.291606	EHD4
ENSG00000104081	-0.874369	0.0207636	0.341182	0.230995	6.5964	2.21558e-25	0.793577	1.28426e-05	0.00327325	BMF
ENSG00000104332	0.323465	-0.00928595	-0.150889	-0.0930921	13.5577	1.24631e-06	0.88922	0.0236598	0.162654	SFRP1
ENSG00000104368	1.40128	-0.0254034	-0.16154	-0.0857838	9.40971	8.52121e-89	0.717753	0.0219072	0.222752	PLAT
ENSG00000104524	0.0360448	-0.194843	-0.590599	-0.535775	4.05608	0.80513	0.197409	0.000225786	0.000733875	PYCR3
ENSG00000104728	0.214843	-0.0236079	-0.317923	-0.273992	6.24871	0.0131506	0.788995	0.000433325	0.00232144	ARHGEF10
ENSG00000104738	1.04706	0.0627265	-0.360291	-0.152937	5.56079	3.78808e-28	0.545453	0.00090988	0.149385	MCM4
ENSG00000104881	0.381983	-0.0149116	-0.3223	-0.0728372	5.51553	4.70278e-05	0.878127	0.00130218	0.45617	PPP1R13L
ENSG00000104886	-0.0321057	-0.245614	-0.312968	-0.207747	4.5133	0.789586	0.0471482	0.0121958	0.091507	PLEKHJ1
ENSG00000105270	-0.258251	0.107308	0.20881	0.18581	6.48199	0.00181027	0.185514	0.00960949	0.0213106	CLIP3
ENSG00000105327	-1.24631	0.193875	-0.0704731	0.305894	4.68982	1.82648e-21	0.077579	0.533503	0.00482393	BBC3
ENSG00000105329	0.186882	0.194328	0.0238408	0.173787	8.33428	0.00960356	0.00709232	0.742222	0.0160883	TGFB1
ENSG00000105355	0.326259	0.166949	-0.0909523	0.0557927	6.94273	4.04951e-05	0.0372649	0.263374	0.488871	PLIN3
ENSG00000105402	-0.104101	0.227892	0.0498388	0.225522	5.12594	0.347814	0.0334348	0.648263	0.0353179	NAPA
ENSG00000105447	0.0045298	-0.145935	-0.376309	-0.219962	5.27278	0.965345	0.168902	0.000546535	0.0396221	GRWD1
ENSG00000105516	-0.628589	0.120507	0.147432	0.330212	4.06735	1.35521e-06	0.309792	0.21282	0.00434859	DBP
ENSG00000105518	-0.433746	-0.00458245	0.19686	0.13752	5.18287	3.29703e-05	0.963495	0.0451962	0.163788	TMEM205
ENSG00000105520	-0.265701	0.15483	0.0744518	0.107551	6.9676	0.000794622	0.046107	0.339357	0.166764	PLPPR2
ENSG00000105605	0.736549	0.254374	0.177197	0.204676	5.36563	3.21877e-14	0.0120893	0.0828559	0.0444189	CACNG7
ENSG00000105726	0.149585	0.219392	0.258307	0.299773	6.75417	0.0688195	0.00742753	0.00158999	0.000238569	ATP13A1
ENSG00000105738	-0.231476	-0.00627259	-0.27798	-0.0376253	6.936	0.00341676	0.936083	0.00046017	0.630976	SIPA1L3
ENSG00000105810	0.0530841	-0.0287712	-0.200864	-0.180801	6.28718	0.543713	0.743823	0.0244303	0.0423566	CDK6
ENSG00000105971	0.211782	0.0682486	-0.117979	-0.196651	5.94881	0.0181453	0.451903	0.200514	0.0339428	CAV2
ENSG00000105974	-0.013353	-0.0112522	-0.257103	-0.211553	9.18666	0.848414	0.872062	0.000250572	0.00255808	CAV1
ENSG00000105976	0.451849	-0.0201867	-0.165458	-0.0795201	8.25347	4.67613e-10	0.783328	0.0249252	0.279589	MET
ENSG00000106153	0.252058	0.0728969	-0.258957	-0.134418	5.84804	0.0053005	0.427043	0.00613185	0.15	CHCHD2
ENSG00000106366	1.99549	0.0753137	-0.400879	-0.3479	9.73863	3.47416e-174	0.282356	1.48577e-08	8.54021e-07	SERPINE1
ENSG00000106484	1.14972	0.113734	-0.693553	-0.365708	5.32617	3.27178e-30	0.306552	1.53667e-08	0.00186402	MEST
ENSG00000106617	0.360361	-0.106509	-0.38363	-0.251802	5.61548	0.000154276	0.284186	0.00017758	0.0125494	PRKAG2
ENSG00000106628	0.256743	0.0461212	-0.210234	0.0539851	6.64543	0.00156851	0.57486	0.0119034	0.511214	POLD2
ENSG00000106636	0.28318	0.0353124	-0.251708	-0.159351	6.95944	0.000417151	0.664279	0.00237587	0.0528505	YKT6
ENSG00000106853	0.266614	0.0306762	0.234461	0.0451505	4.58499	0.0214427	0.797119	0.0443384	0.704589	PTGR1
ENSG00000106976	-0.317204	0.140055	0.190016	0.309865	4.42164	0.0119308	0.241111	0.109866	0.00815294	DNM1
ENSG00000107140	0.161809	0.237701	0.0607804	0.26781	4.91425	0.147187	0.0320498	0.591089	0.0153615	TESK1
ENSG00000107554	0.688309	-0.0618272	-0.149314	-0.0830326	8.19264	1.3402e-21	0.398844	0.0422213	0.257479	DNMBP
ENSG00000107581	-0.17783	-0.0147611	0.139885	-0.0238294	9.10255	0.0105288	0.831451	0.0433115	0.731174	EIF3A
ENSG00000107738	-0.400829	0.136819	-0.493149	-0.196667	4.6158	0.00138088	0.244476	0.000105052	0.107885	VSIR
ENSG00000107796	0.625163	0.346188	-0.103108	-0.194879	4.68248	9.36391e-07	0.00878841	0.462065	0.169393	ACTA2
ENSG00000107984	1.2775	-0.0662887	-0.808735	-0.710175	4.8692	2.82009e-25	0.648483	5.80486e-07	8.27119e-06	DKK1
ENSG00000108107	-0.00277852	0.131678	-0.167549	0.15099	9.18853	0.968166	0.0581772	0.0164372	0.0297993	RPL28
ENSG00000108219	0.192017	0.039574	0.0371725	0.154771	7.51763	0.0099362	0.597252	0.619776	0.0380163	TSPAN14
ENSG00000108395	-0.179007	-0.11209	-0.24952	-0.227348	5.5394	0.0631416	0.242325	0.010225	0.0189409	TRIM37
ENSG00000108518	0.29172	0.0890927	-0.315704	-0.0813517	8.57453	4.10142e-05	0.212159	1.22342e-05	0.256465	PFN1
ENSG00000108799	-0.183264	-0.182688	0.0511498	-0.0384487	5.79094	0.0421886	0.0430759	0.56419	0.666632	EZH1
ENSG00000108821	0.124978	-0.260814	-0.472952	-0.234226	5.38525	0.17259	0.00595385	1.02972e-06	0.0132665	COL1A1
ENSG00000108829	0.386257	-0.0705801	-0.380273	-0.251125	6.8352	2.93872e-06	0.406511	1.24092e-05	0.00354452	LRRC59
ENSG00000108848	-0.3011	-0.143974	0.0848858	-0.0936599	7.92131	3.47592e-05	0.0467517	0.238226	0.195109	LUC7L3
ENSG00000108932	-0.592676	0.0394399	0.311861	0.243823	4.33051	3.52493e-05	0.764877	0.0144504	0.0576962	SLC16A6
ENSG00000108947	-0.116337	0.238508	0.271227	0.238488	4.99565	0.288154	0.0239642	0.010035	0.0239461	EFNB3
ENSG00000109066	0.295728	0.0126528	-0.254834	-0.118134	5.39075	0.00405971	0.905025	0.0196394	0.271824	TMEM104
ENSG00000109089	0.660804	0.13711	-0.509477	-0.0614407	4.14197	8.07055e-08	0.296997	0.000383085	0.648668	CDR2L
ENSG00000109220	-0.264631	-0.259585	-0.408608	-0.309213	4.94141	0.0182098	0.0206828	0.000347564	0.0061242	CHIC2
ENSG00000110047	-0.264263	0.00819467	-0.279247	-0.122907	6.71429	0.00154938	0.920523	0.000846938	0.137627	EHD1
ENSG00000110057	-0.124608	0.354222	0.0718509	0.327088	4.91208	0.259442	0.000760327	0.507357	0.00192665	UNC93B1
ENSG00000110080	0.248828	0.193179	0.12259	0.0841068	5.2369	0.0109841	0.0497624	0.216309	0.397658	ST3GAL4
ENSG00000110092	0.348438	0.00167622	-0.374841	-0.161181	9.57494	4.46806e-07	0.980691	7.64357e-08	0.0202591	CCND1
ENSG00000110237	-0.382478	-0.0986606	-0.1829	-0.0637799	6.30727	7.78624e-06	0.239862	0.0303424	0.446264	ARHGEF17
ENSG00000111144	-0.17606	0.0758456	0.176383	0.0963317	7.11671	0.0240071	0.325539	0.0217077	0.21133	LTA4H
ENSG00000111186	0.435051	0.185362	-0.206371	0.0316223	5.91644	2.40977e-06	0.0491574	0.0345629	0.740454	WNT5B
ENSG00000111271	0.277042	0.0849951	0.278063	0.100912	5.02315	0.0105019	0.44252	0.0103638	0.360933	ACAD10
ENSG00000111364	-0.185571	-0.31099	-0.175691	-0.282293	4.09302	0.158465	0.0203302	0.182392	0.0344443	DDX55
ENSG00000111371	0.226491	-0.0448225	-0.206158	-0.151663	7.27731	0.00299909	0.561615	0.00808646	0.0506594	SLC38A1
ENSG00000111642	-0.188531	0.0603212	0.167982	0.15018	8.56656	0.00791665	0.393115	0.0172051	0.0332116	CHD4
ENSG00000111669	0.239083	0.00157344	-0.164585	-0.108921	10.5532	0.000413313	0.981476	0.0152913	0.108267	TPI1
ENSG00000111678	-0.230912	-0.118689	-0.298246	-0.0724025	6.31347	0.00595837	0.154805	0.000414696	0.383954	C12orf57
ENSG00000111711	0.155128	-0.0385444	-0.123496	-0.24454	7.21819	0.0463113	0.623931	0.117915	0.00208959	GOLT1B
ENSG00000111790	-0.238255	-0.170633	0.113794	-0.0226394	6.1609	0.00640818	0.0499654	0.182429	0.792592	FGFR1OP2
ENSG00000111799	0.0529295	-0.257039	-0.294807	-0.200109	9.68845	0.440812	0.000193466	1.93738e-05	0.00367722	COL12A1
ENSG00000111961	-0.032048	0.0573744	0.241374	0.215388	5.47844	0.742857	0.554253	0.011485	0.0243244	SASH1
ENSG00000112033	0.548022	0.0624789	-0.170599	0.0737194	6.52892	2.27174e-11	0.458561	0.0464392	0.381392	PPARD
ENSG00000112118	0.746729	0.0264334	-0.467026	-0.196695	5.72432	5.7493e-16	0.78729	5.75826e-06	0.0493369	MCM3
ENSG00000112186	-0.59192	-0.0626464	-0.177513	-0.0776264	6.62342	2.01973e-12	0.441169	0.0302559	0.340237	CAP2
ENSG00000112245	0.400146	0.0750737	0.259811	0.101841	6.81156	1.21717e-06	0.372048	0.00179016	0.225069	PTP4A1
ENSG00000112658	0.213612	0.195875	-0.24374	-0.0437609	5.94322	0.0238204	0.0387559	0.0135423	0.651159	SRF
ENSG00000112715	0.11066	-0.00132844	0.29822	0.156403	8.68651	0.113969	0.984892	1.97119e-05	0.0254188	VEGFA
ENSG00000112773	-0.478539	-0.0286443	0.250176	0.138051	8.44029	3.33575e-11	0.687736	0.000417358	0.0519114	FAM46A
ENSG00000112902	0.988496	-0.0438204	-0.194187	-0.104273	7.00873	2.13117e-37	0.586987	0.0170653	0.197647	SEMA5A
ENSG00000112983	-0.183644	-0.197647	0.0636496	-0.10561	6.37939	0.031141	0.0206171	0.44816	0.21307	BRD8
ENSG00000112984	0.615353	0.215248	0.466476	0.0860454	4.27273	4.6574e-06	0.128853	0.000676932	0.550622	KIF20A
ENSG00000113361	0.964122	-0.00612312	-0.367786	-0.209541	5.5191	2.03285e-23	0.953797	0.000828717	0.052329	CDH6
ENSG00000113368	0.597778	-0.310726	0.0229872	-0.25286	4.32228	2.33794e-06	0.0293052	0.866163	0.0737359	LMNB1
ENSG00000113369	-0.376871	-0.0199983	0.173795	-0.0425513	8.07271	3.11353e-07	0.783568	0.0164425	0.559159	ARRDC3
ENSG00000113721	-0.640125	0.059206	-0.00142671	0.155363	6.90422	2.42663e-15	0.446726	0.985416	0.0449282	PDGFRB
ENSG00000113739	0.608925	-0.0451645	-0.384231	-0.238885	8.59017	1.33036e-17	0.5314	1.38598e-07	0.000995813	STC2
ENSG00000113810	-0.21106	-0.167575	0.0533864	-0.074456	6.71668	0.010202	0.041018	0.5097	0.361149	SMC4
ENSG00000114098	-0.21327	-0.153078	-0.0254491	-0.211	5.22112	0.041848	0.142195	0.804836	0.0443003	ARMC8
ENSG00000114270	-0.198843	-0.210018	-0.0694703	0.021489	5.66827	0.0285248	0.0209943	0.440118	0.809824	COL7A1
ENSG00000114346	0.470301	-0.262597	-0.188615	-0.390425	5.25075	1.916e-06	0.0134842	0.0738066	0.000291144	ECT2
ENSG00000114353	-0.167834	0.0507868	-0.173338	0.00152121	9.24335	0.0155739	0.462881	0.0125198	0.982467	GNAI2
ENSG00000114450	0.312362	-0.000831673	-0.154716	-0.388651	4.56575	0.0111942	0.994824	0.236994	0.00393766	GNB4
ENSG00000114770	-0.219571	-0.273777	0.0612455	-0.0520988	5.99934	0.0131853	0.00211492	0.48082	0.551727	ABCC5
ENSG00000114796	-0.212237	0.0616604	0.289547	0.125061	5.31876	0.0322036	0.523686	0.00226499	0.19328	KLHL24
ENSG00000114850	0.144409	-0.0612605	-0.162964	-0.149976	8.14407	0.0469021	0.402144	0.0263529	0.0408174	SSR3
ENSG00000114857	-0.25972	-0.216411	0.115676	-0.0465851	7.1282	0.000870432	0.00546338	0.131677	0.546462	NKTR
ENSG00000114861	0.304059	0.149904	0.0642054	0.228585	5.05362	0.00444927	0.168208	0.558915	0.0340701	FOXP1
ENSG00000115041	0.665667	0.275795	-0.210467	0.162195	4.29262	5.5578e-08	0.0319619	0.124539	0.213522	KCNIP3
ENSG00000115073	0.343337	-0.0304587	-0.185724	-0.0245909	6.32814	3.05267e-05	0.717795	0.029276	0.770328	ACTR1B
ENSG00000115091	0.163412	-0.10955	-0.251367	-0.156262	7.75111	0.0295354	0.149002	0.00100323	0.0399317	ACTR3
ENSG00000115129	-0.340198	0.026104	0.112866	0.226799	4.61695	0.00564717	0.824591	0.333268	0.0486951	TP53I3
ENSG00000115310	0.337303	-0.0305672	-0.191552	-0.10358	9.76512	8.13383e-07	0.65571	0.0053021	0.13116	RTN4
ENSG00000115363	-0.375235	-0.0309854	-0.222645	-0.11713	5.85054	4.96553e-05	0.730518	0.0148821	0.195895	EVA1A
ENSG00000115419	-0.0717462	-0.243735	-0.188104	-0.221688	6.4264	0.401205	0.00489566	0.0292826	0.0103496	GLS
ENSG00000115525	-1.52383	0.0930041	0.497279	0.230334	5.51153	2.28002e-49	0.292883	7.58152e-09	0.00850903	ST3GAL5
ENSG00000115556	-1.04446	-0.0341294	0.38578	0.143019	4.42628	3.55186e-16	0.762961	0.000362691	0.19725	PLCD4
ENSG00000115758	0.291889	0.0250108	0.211889	0.0298128	7.37109	0.00016756	0.750115	0.00651387	0.704117	ODC1
ENSG00000115884	0.661677	0.134153	-0.17672	0.16505	6.50356	8.4051e-16	0.113348	0.0412694	0.0509237	SDC1
ENSG00000115993	-0.180359	-0.0906964	-0.181253	-0.29631	6.32777	0.0369311	0.291446	0.0362871	0.000685941	TRAK2
ENSG00000116001	-0.401653	-0.126047	0.152986	0.0207037	6.98679	3.15742e-07	0.103794	0.0456971	0.78791	TIA1
ENSG00000116005	-0.301377	0.0139072	0.147407	0.0724822	8.07774	3.71211e-05	0.847648	0.0410697	0.315922	PCYOX1
ENSG00000116044	-0.419656	0.0589433	0.184626	0.0661095	7.63536	3.17716e-08	0.428526	0.0127944	0.374403	NFE2L2
ENSG00000116095	-0.248914	-0.243476	-0.178875	-0.298853	4.32033	0.0481763	0.053555	0.153026	0.0185975	PLEKHA3
ENSG00000116237	0.305439	-0.0122601	-0.23899	-0.0573764	6.83462	0.000143033	0.880806	0.00396329	0.483944	ICMT
ENSG00000116285	0.604552	0.186517	0.258876	0.0756321	8.01492	6.20243e-16	0.0137961	0.000612798	0.319981	ERRFI1
ENSG00000116649	0.423804	0.00301415	-0.578231	-0.16991	6.47538	4.66106e-07	0.97219	1.73527e-10	0.0522859	SRM
ENSG00000116670	0.5078	0.347469	0.267704	0.225497	5.04552	1.25028e-06	0.00111183	0.0127674	0.0366086	MAD2L2
ENSG00000116679	-0.675202	-0.160413	-0.199949	-0.123957	7.34949	1.79138e-18	0.0328371	0.00792722	0.0986086	IVNS1ABP
ENSG00000116754	-0.204871	-0.181157	0.0487313	-0.130145	8.00595	0.00478388	0.0125777	0.499339	0.0725394	SRSF11
ENSG00000116815	0.342991	0.0112602	0.212748	0.140741	5.68471	0.000185651	0.905049	0.0219549	0.131609	CD58
ENSG00000117143	0.475931	0.00843386	-0.149351	-0.333206	6.38338	2.69041e-08	0.924013	0.0953515	0.000245232	UAP1
ENSG00000117152	0.444987	-0.0259505	-0.270958	-0.260208	8.84747	2.01253e-10	0.712457	0.000129799	0.000236316	RGS4
ENSG00000117394	-0.282107	0.0122418	-0.159494	-0.0450499	9.77692	3.9603e-05	0.85796	0.019956	0.510372	SLC2A1
ENSG00000117395	0.0977842	-0.164438	-0.206899	-0.266436	5.41249	0.333351	0.113605	0.0476175	0.0111869	EBNA1BP2
ENSG00000117411	0.278814	0.0389423	-0.266312	-0.126884	6.69639	0.000511359	0.632043	0.00131408	0.122294	B4GALT2
ENSG00000117461	-0.893732	-0.104321	0.0597676	0.342267	4.12687	1.44036e-08	0.460339	0.665674	0.010189	PIK3R3
ENSG00000117519	0.505356	-0.0359069	-0.190122	-0.178042	8.88208	6.53983e-13	0.612344	0.00751439	0.0122627	CNN3
ENSG00000117525	1.15772	0.00676004	-0.494354	-0.472434	7.97698	4.84178e-53	0.931169	8.20546e-10	4.11247e-09	F3
ENSG00000118007	-0.300163	-0.125425	-0.0282393	-0.178829	6.171	0.000658986	0.149623	0.743986	0.0407076	STAG1
ENSG00000118046	-0.069527	0.167069	0.0409635	0.165471	6.43463	0.406745	0.0432808	0.622962	0.0453111	STK11
ENSG00000118515	-0.377587	0.0014083	0.60201	0.192097	5.18764	0.000358089	0.988968	4.40927e-10	0.0546526	SGK1
ENSG00000118523	1.71433	0.122332	-0.952546	-0.720692	7.91616	2.66716e-113	0.120152	1.33378e-29	3.17154e-18	CTGF
ENSG00000118600	-0.241458	0.278868	0.382574	0.241004	4.22585	0.0814837	0.0316376	0.00284203	0.0644762	TMEM5
ENSG00000118680	0.240819	-0.062973	-0.223565	-0.180479	7.96812	0.00106804	0.396925	0.00280336	0.0156309	MYL12B
ENSG00000118707	0.108856	0.260753	0.157521	0.311443	4.42961	0.382659	0.033471	0.20485	0.0105956	TGIF2
ENSG00000118762	0.340692	-0.0963732	0.241443	0.181098	7.31921	7.28488e-06	0.212788	0.00154987	0.0178165	PKD2
ENSG00000118785	-0.446932	-0.0399195	0.291359	0.0916473	8.79009	2.09767e-10	0.567082	2.73755e-05	0.187967	SPP1
ENSG00000119280	0.323581	0.00369046	-0.371314	-0.00854665	6.17703	0.00027333	0.967722	8.15831e-05	0.925392	C1orf198
ENSG00000119522	0.265818	0.345913	0.125518	0.179123	4.76746	0.0212263	0.00252525	0.285407	0.124709	DENND1A
ENSG00000119681	0.439897	-0.0722918	-0.259295	-0.0921678	7.97633	1.39971e-09	0.326294	0.000471167	0.211029	LTBP2
ENSG00000119777	0.319918	0.00221913	-0.185896	-0.0271981	7.25276	3.24379e-05	0.977326	0.0183841	0.727919	TMEM214
ENSG00000119812	0.37323	0.0414505	-0.209654	-0.147634	6.24848	3.14634e-05	0.652595	0.0259323	0.114538	FAM98A
ENSG00000119820	-0.356128	-0.149177	0.0210696	-0.193403	6.10471	5.40338e-05	0.0860589	0.806204	0.026519	YIPF4
ENSG00000119899	0.252105	-0.0563057	-0.295	-0.142499	6.0806	0.00392068	0.529264	0.00123519	0.113733	SLC17A5
ENSG00000119927	-0.523917	0.0122862	0.299839	0.104451	8.29147	4.00977e-13	0.862889	2.27707e-05	0.141288	GPAM
ENSG00000119938	-0.565581	-0.108233	-0.287011	-0.148488	5.08341	2.37821e-07	0.299262	0.00694868	0.156051	PPP1R3C
ENSG00000120129	1.19489	0.242886	0.0181773	0.182629	5.2357	3.54676e-30	0.0350501	0.87791	0.115364	DUSP1
ENSG00000120254	0.255466	-0.00817217	-0.274398	-0.188845	5.53872	0.00862453	0.93473	0.00744604	0.062971	MTHFD1L
ENSG00000120688	-0.0759188	-0.272525	-0.150942	-0.30465	4.6049	0.511085	0.0214246	0.196357	0.0103963	WBP4
ENSG00000120738	2.33561	1.95968	0.387325	0.00937949	6.26844	1.60364e-137	6.99116e-94	0.000333724	0.933468	EGR1
ENSG00000122591	0.124874	-0.0790351	-0.216727	-0.18189	6.99976	0.114168	0.322816	0.00716334	0.0236626	FAM126A
ENSG00000122641	1.06316	-0.1378	-0.284935	-0.220044	7.96054	1.55173e-47	0.0684103	0.000181958	0.00373217	INHBA
ENSG00000122786	0.0797791	-0.0286386	-0.180436	-0.188041	8.4061	0.273451	0.695246	0.0140653	0.0104951	CALD1
ENSG00000122861	1.52408	0.00774575	-0.327114	-0.255296	8.03619	8.07915e-98	0.916649	1.28222e-05	0.000634547	PLAU
ENSG00000123104	0.396097	-0.28431	0.185046	-0.0118694	4.33363	0.00128796	0.0342701	0.143611	0.927017	ITPR2
ENSG00000123106	-0.201068	-0.0910956	0.0387215	-0.189071	5.61098	0.0352753	0.336017	0.679308	0.0477551	CCDC91
ENSG00000123144	-0.193531	0.090141	-0.165195	-0.000956682	6.77994	0.0170246	0.259231	0.0415646	0.990492	C19orf43
ENSG00000123146	-0.106309	0.237873	0.285077	0.192195	4.30125	0.399103	0.049496	0.0179917	0.114346	ADGRE5
ENSG00000123374	0.498818	0.0532764	-0.298518	-0.199353	4.348	2.27488e-05	0.668196	0.0217134	0.120126	CDK2
ENSG00000123384	-0.125301	-0.181793	-0.185669	0.0545857	10.813	0.0632728	0.00707654	0.00595082	0.418046	LRP1
ENSG00000123416	-1.51225	-0.447141	1.46123	0.858762	6.268	1.36331e-45	2.68213e-06	1.06321e-67	2.60747e-23	TUBA1B
ENSG00000123505	0.248806	-0.0920231	-0.137369	-0.253337	5.42409	0.0168462	0.394221	0.205931	0.0211911	AMD1
ENSG00000124193	-0.320203	-0.153817	0.0613345	-0.0561588	7.82207	1.59763e-05	0.0371037	0.402641	0.445046	SRSF6
ENSG00000124357	-0.232167	-0.218081	-0.0945451	-0.0891524	6.18782	0.00701808	0.0113285	0.268213	0.296015	NAGK
ENSG00000124762	-0.048657	0.175743	0.207003	0.19299	8.14784	0.506694	0.0158429	0.0044621	0.00803522	CDKN1A
ENSG00000124766	-0.0570535	0.0749065	0.317556	0.189878	6.83827	0.470133	0.340182	4.38976e-05	0.0150666	SOX4
ENSG00000124795	0.205543	-0.00584486	-0.137358	-0.179454	7.26846	0.00757454	0.940054	0.0791587	0.0220447	DEK
ENSG00000124942	-0.124376	-0.208364	-0.241377	-0.140095	10.23	0.0672571	0.0021942	0.000390731	0.0393293	AHNAK
ENSG00000125148	1.3415	0.0875601	-0.301803	0.0780279	8.46163	2.46344e-78	0.22655	3.81865e-05	0.281271	MT2A
ENSG00000125378	-0.0627731	0.0720121	-0.327392	-0.487194	4.17671	0.679536	0.629883	0.03854	0.00259876	BMP4
ENSG00000125534	0.282602	0.184826	-0.0877279	0.116756	7.65417	0.000157713	0.013803	0.247419	0.120671	PPDPF
ENSG00000125538	1.93884	0.0234421	-0.139269	-0.18724	7.50378	2.46375e-147	0.762835	0.0753647	0.017043	IL1B
ENSG00000125656	0.04311	0.217113	-0.233706	0.0659082	5.36752	0.663299	0.0260835	0.0218852	0.505228	CLPP
ENSG00000125772	-1.06426	-0.0883876	0.412659	0.233062	5.77752	2.60318e-26	0.333552	2.78257e-06	0.00892555	GPCPD1
ENSG00000125827	-0.559548	0.160098	0.414325	0.258912	7.62134	2.73899e-13	0.0313116	2.01411e-08	0.000478371	TMX4
ENSG00000125835	0.365832	0.0634002	-0.298907	-0.139336	6.33114	1.99695e-05	0.469341	0.000916504	0.117269	SNRPB
ENSG00000125912	0.400114	0.031651	-0.282584	-0.148085	6.58059	9.04444e-07	0.70375	0.000889991	0.0786094	NCLN
ENSG00000125945	-0.394162	-0.027905	0.296942	0.186314	4.9848	0.000519482	0.798175	0.00489704	0.0806221	ZNF436
ENSG00000126001	-0.028557	-0.222208	-0.204708	-0.147703	5.90733	0.750258	0.0148846	0.0247315	0.103294	CEP250
ENSG00000126254	0.207658	0.264509	0.0226138	0.1822	5.71526	0.0305383	0.00568621	0.81711	0.0585318	RBM42
ENSG00000126351	-0.277155	0.11944	0.116974	0.18658	6.3157	0.00122156	0.152749	0.161582	0.0248927	THRA
ENSG00000126461	0.212299	0.114734	-0.166022	0.0917827	6.72177	0.00947483	0.16353	0.0476515	0.265603	SCAF1
ENSG00000126775	-0.300366	0.0606449	0.234128	0.105958	4.94137	0.0081187	0.578418	0.0289709	0.32912	ATG14
ENSG00000126778	-0.948635	-0.0444145	-0.16338	-0.0913681	6.72046	2.39436e-29	0.576468	0.0412797	0.251679	SIX1
ENSG00000127528	-0.294297	0.134865	-0.524126	-0.0634426	4.80045	0.0141548	0.237783	2.29078e-05	0.587166	KLF2
ENSG00000127585	0.31293	-0.0984024	-0.248139	0.0367418	5.43726	0.00124176	0.329055	0.015395	0.711875	FBXL16
ENSG00000127589	-1.41114	-0.323633	1.39727	0.86065	6.05744	9.47237e-40	0.00068728	9.62155e-61	5.47274e-23	NA
ENSG00000127603	0.046629	-0.144191	-0.167969	-0.119368	8.65735	0.508546	0.0417788	0.0177988	0.091741	MACF1
ENSG00000127824	-1.0903	-0.364128	2.01542	0.899556	5.25871	5.5166e-18	0.00158835	3.70375e-102	6.22976e-19	TUBA4A
ENSG00000128245	0.346716	-0.0821564	-0.32019	-0.241054	6.40271	3.35139e-05	0.339352	0.000255562	0.0055828	YWHAH
ENSG00000128283	0.436242	0.0977145	-0.166548	0.118499	7.15172	1.6834e-08	0.21303	0.0362994	0.130591	CDC42EP1
ENSG00000128510	1.83367	0.0972112	-0.291771	-0.0723489	4.6773	1.17307e-59	0.476695	0.0428331	0.604466	CPA4
ENSG00000128595	0.192837	-0.0207626	-0.0906243	-0.15844	10.0875	0.00457032	0.760428	0.183515	0.0201389	CALU
ENSG00000128626	0.278026	0.25717	0.0547912	0.0332593	4.36578	0.0314572	0.0475625	0.68101	0.803286	MRPS12
ENSG00000129038	-0.360798	0.11631	-0.216765	0.0882345	9.78949	1.43226e-07	0.0881749	0.00153935	0.195904	LOXL1
ENSG00000129116	0.306789	-0.0415879	-0.194777	-0.105357	7.31997	7.58452e-05	0.597686	0.0142498	0.182635	PALLD
ENSG00000129680	0.391361	-0.0980922	0.301017	0.134087	4.68545	0.000902624	0.43341	0.0116945	0.270412	MAP7D3
ENSG00000130066	-0.67959	0.0377487	0.205752	0.251313	6.4275	1.15737e-15	0.641117	0.0103808	0.00169728	SAT1
ENSG00000130309	0.324978	-0.0509779	-0.182831	-0.0380503	6.57193	8.48546e-05	0.547187	0.0324638	0.652862	COLGALT1
ENSG00000130332	0.278528	0.0961148	-0.290023	-0.0670343	4.51487	0.0187437	0.428012	0.0227184	0.587772	LSM7
ENSG00000130402	0.465098	0.045884	-0.315661	-0.0677954	10.3827	8.10252e-12	0.50046	3.9041e-06	0.319932	ACTN4
ENSG00000130517	-0.266255	0.186082	0.262377	0.2293	5.77968	0.003656	0.0354846	0.00288243	0.00933144	PGPEP1
ENSG00000130520	0.187014	0.0615052	-0.192285	-0.0576899	5.99067	0.0348558	0.492231	0.0354994	0.523297	LSM4
ENSG00000130522	0.645837	0.0674562	-0.0638409	0.230482	6.81381	1.99784e-16	0.403078	0.432299	0.00395917	JUND
ENSG00000130702	-0.236557	-0.010076	-0.118916	0.179655	7.20706	0.0021845	0.895162	0.121761	0.0179136	LAMA5
ENSG00000131051	-0.240651	-0.149741	0.0984186	-0.0687464	7.94881	0.00102501	0.0405128	0.175113	0.345709	RBM39
ENSG00000131236	0.369139	0.041438	-0.239059	-0.0693985	8.4511	3.0549e-07	0.568472	0.00111023	0.341021	CAP1
ENSG00000131389	-0.67105	0.0672329	0.279019	0.195614	7.50205	1.48642e-18	0.363734	0.000149424	0.00797629	SLC6A6
ENSG00000131435	0.217556	0.0890796	-0.249607	0.0781699	5.64363	0.0183418	0.339789	0.00948102	0.402556	PDLIM4
ENSG00000131462	-0.522966	-0.23557	0.57302	0.479261	4.90474	2.11115e-05	0.0475231	1.34773e-07	1.2382e-05	TUBG1
ENSG00000131473	0.338442	0.0411751	-0.191367	-0.0844851	7.94932	4.13854e-06	0.578788	0.0105313	0.256707	ACLY
ENSG00000131669	-0.365861	0.267908	0.205612	0.293666	7.61996	8.41959e-07	0.0002342	0.00481873	5.45367e-05	NINJ1
ENSG00000131747	0.902314	-0.0363417	-0.419002	-0.161535	5.83124	3.77044e-23	0.711456	4.08469e-05	0.104186	TOP2A
ENSG00000131748	0.228216	0.247216	0.21221	0.233749	5.52267	0.0179499	0.0103244	0.0282333	0.0154034	STARD3
ENSG00000131759	-0.599045	0.148108	-0.00864316	0.15798	7.5018	9.21645e-15	0.0477969	0.908578	0.0346898	RARA
ENSG00000131873	0.268361	0.179515	0.0333892	0.0298382	6.12163	0.00275054	0.0468569	0.714885	0.743997	CHSY1
ENSG00000132274	-0.18391	-0.0327745	0.317388	0.0713916	6.09025	0.0382234	0.70899	0.000214648	0.412616	TRIM22
ENSG00000132300	-0.217716	-0.23849	-0.00548437	-0.119845	5.88359	0.0170622	0.00918455	0.951329	0.186016	PTCD3
ENSG00000132357	0.297976	0.115628	0.37646	0.0785442	4.18448	0.0269411	0.402675	0.00485863	0.571492	CARD6
ENSG00000132382	0.194635	-0.147537	-0.245628	-0.0457851	5.69852	0.046393	0.144426	0.016195	0.647233	MYBBP1A
ENSG00000132424	-0.310979	-0.148448	0.200326	-0.00519188	7.91715	1.93112e-05	0.0404251	0.00527647	0.942626	PNISR
ENSG00000132470	-0.1543	0.0715007	-0.203251	0.127752	8.23044	0.0296909	0.311537	0.00424556	0.0702911	ITGB4
ENSG00000132485	-0.242918	-0.181375	0.0158565	-0.120756	7.10658	0.00180916	0.0195425	0.836819	0.118904	ZRANB2
ENSG00000132507	0.487482	0.0962062	-0.363613	-0.0238936	7.53691	1.22317e-10	0.210567	3.72098e-06	0.757047	EIF5A
ENSG00000132510	-0.298742	0.0794958	0.116814	0.196719	5.81229	0.00112215	0.371945	0.18849	0.0258267	KDM6B
ENSG00000132535	-0.340622	0.0484269	0.146896	0.166431	6.63435	2.32159e-05	0.539152	0.061341	0.033793	DLG4
ENSG00000133112	-0.192747	0.00241279	0.155779	0.0357478	10.5348	0.00441321	0.971531	0.0211425	0.596908	TPT1
ENSG00000133216	0.915039	0.224455	-0.0946809	0.181219	5.20897	1.82874e-19	0.0384638	0.399379	0.0961127	EPHB2
ENSG00000133639	-0.341052	0.0207141	0.197878	0.0757808	7.63172	5.34908e-06	0.779446	0.00716249	0.304707	BTG1
ENSG00000133657	0.498828	-0.0988813	-0.160403	-0.137699	7.70392	1.47868e-11	0.189286	0.033705	0.0679514	ATP13A3
ENSG00000133706	0.265828	-0.102189	-0.0464029	-0.200498	6.88902	0.000762978	0.204472	0.563356	0.0132948	LARS
ENSG00000133816	0.832035	0.0515898	-0.249087	-0.00892637	6.90462	4.0349e-25	0.537361	0.00353152	0.915321	MICAL2
ENSG00000133858	0.0317848	-0.247966	-0.144277	-0.218207	6.27185	0.7058	0.0039018	0.0908452	0.0109097	ZFC3H1
ENSG00000134013	0.911551	0.0959949	-0.244308	0.00568874	9.10044	1.05198e-38	0.173021	0.000576683	0.935745	LOXL2
ENSG00000134294	0.180187	-0.122648	-0.231927	-0.19215	9.45477	0.00935051	0.0781835	0.000888985	0.0058507	SLC38A2
ENSG00000134352	0.230692	0.0566893	0.21895	0.0359997	7.83528	0.00186553	0.447325	0.00318147	0.629636	IL6ST
ENSG00000134531	0.173692	-0.00762374	-0.235516	-0.0972968	8.12602	0.0165687	0.91667	0.00133617	0.182925	EMP1
ENSG00000134590	0.208542	0.0280895	-0.230768	-0.0936449	7.48416	0.00607492	0.713807	0.00291448	0.223874	RTL8C
ENSG00000134871	0.513195	0.0519611	-0.178337	0.0083616	9.08011	1.95205e-13	0.458937	0.011397	0.905201	COL4A2
ENSG00000134882	0.175264	0.122049	0.0186204	0.193413	6.27033	0.0395563	0.153562	0.828889	0.0230607	UBAC2
ENSG00000134884	-0.172794	-0.211595	0.0126605	-0.080456	6.8279	0.0305019	0.00825724	0.872941	0.311618	ARGLU1
ENSG00000135046	-0.347839	-0.0762049	-0.226796	-0.0894996	9.22038	5.5319e-07	0.270483	0.00107061	0.195669	ANXA1
ENSG00000135074	0.698124	0.0460147	-0.264918	0.0272693	6.41727	2.50528e-17	0.591184	0.00251266	0.750514	ADAM19
ENSG00000135093	-0.296294	0.0919364	0.322115	0.317615	4.57428	0.0160522	0.43441	0.00495373	0.00557871	USP30
ENSG00000135473	-0.453087	-0.25834	-0.0544947	-0.0255968	5.72053	1.05408e-06	0.00469012	0.544336	0.775178	PAN2
ENSG00000135905	-0.537673	-0.172955	-0.443659	-0.16004	4.6557	2.06307e-05	0.152283	0.00038979	0.184491	DOCK10
ENSG00000135916	-0.152861	0.242795	0.0972668	0.277479	5.51825	0.126789	0.0119755	0.320606	0.00396282	ITM2C
ENSG00000136026	0.371066	0.0261635	-0.16382	-0.0342285	9.35421	7.80394e-08	0.705786	0.0184366	0.62166	CKAP4
ENSG00000136048	0.634269	0.269476	0.157681	0.187399	4.5755	1.07568e-07	0.0307693	0.212811	0.136859	DRAM1
ENSG00000136068	0.353488	-0.0847825	-0.14346	-0.0311875	8.38833	6.04177e-07	0.235383	0.0450055	0.662053	FLNB
ENSG00000136108	0.580259	-0.131208	0.235821	0.109373	5.42201	6.18948e-09	0.220998	0.0224053	0.295305	CKAP2
ENSG00000136153	0.336775	-0.0574325	-0.313546	-0.353314	8.10276	4.58024e-06	0.440085	3.02495e-05	2.6795e-06	LMO7
ENSG00000136158	-0.676028	-0.0636524	-0.145125	-0.13898	8.5074	2.19622e-21	0.363801	0.0387283	0.0476967	SPRY2
ENSG00000136205	-0.358712	-0.0189257	-0.265182	-0.1287	9.47929	2.19182e-07	0.783433	0.000124662	0.0619883	TNS3
ENSG00000136231	0.164975	0.0258006	-0.180107	-0.0509936	6.86733	0.0397961	0.749809	0.0279102	0.53025	IGF2BP3
ENSG00000136240	0.126025	0.00334193	-0.213711	-0.161924	8.62852	0.0743813	0.962359	0.00267785	0.0227084	KDELR2
ENSG00000136436	-0.360667	0.0586589	0.161248	0.123188	6.43462	1.59744e-05	0.471578	0.0466296	0.129133	CALCOCO2
ENSG00000136478	-0.379534	0.046064	0.186725	0.0358273	6.11056	2.7092e-05	0.59881	0.0313161	0.682565	TEX2
ENSG00000136824	0.514574	-0.0359379	-0.0825181	-0.239804	5.4421	1.11853e-07	0.724965	0.42161	0.0214814	SMC2
ENSG00000136830	-0.16666	0.0534048	-0.213671	-0.0575921	10.3774	0.0139952	0.430315	0.00164048	0.39537	FAM129B
ENSG00000136859	0.491232	0.129429	0.1618	0.226652	4.66593	3.11396e-06	0.237112	0.138268	0.0364107	ANGPTL2
ENSG00000136997	0.936853	0.0176471	-0.43175	-0.323593	5.40177	1.48334e-21	0.869159	0.000128115	0.00362038	MYC
ENSG00000137076	0.194886	-0.0488747	-0.29705	-0.105601	9.92793	0.00430765	0.474905	1.5029e-05	0.122854	TLN1
ENSG00000137210	-0.302473	-0.273405	-0.19174	-0.336067	4.22942	0.021713	0.037647	0.140916	0.0112471	TMEM14B
ENSG00000137309	0.514325	0.0983109	-0.248948	0.11391	9.5795	7.30642e-14	0.153534	0.000322636	0.0981497	HMGA1
ENSG00000137312	0.266243	0.0358605	-0.134533	-0.0102807	9.68198	9.73975e-05	0.600217	0.04971	0.880617	FLOT1
ENSG00000137331	0.188993	-0.033102	-0.207124	-0.199957	6.16111	0.0254538	0.700027	0.0173312	0.0214638	IER3
ENSG00000137801	1.12519	0.0474889	-0.41426	-0.414611	10.4373	5.03063e-60	0.48931	2.11543e-09	2.04248e-09	THBS1
ENSG00000137804	0.778358	-0.143359	-0.592546	-0.211608	4.20022	2.3126e-10	0.298622	5.45418e-05	0.128317	NUSAP1
ENSG00000137818	0.0200355	0.165658	-0.198941	0.114106	9.10431	0.773534	0.0171632	0.00443432	0.100877	RPLP1
ENSG00000137831	-0.363919	-0.123787	-0.00382406	-0.164383	8.43438	4.27209e-07	0.0834118	0.95723	0.0216371	UACA
ENSG00000137936	0.246185	-0.104463	-0.346066	-0.118911	5.69112	0.00793229	0.274864	0.000409333	0.214384	BCAR3
ENSG00000137941	0.328707	-0.14034	-0.0397923	-0.241318	4.50221	0.00341941	0.236972	0.7345	0.0444981	TTLL7
ENSG00000137959	-1.02969	-0.0819124	0.262336	0.120244	4.74817	8.23936e-19	0.432689	0.0093572	0.239657	IFI44L
ENSG00000137962	0.277045	0.00068378	-0.206813	-0.108766	7.99357	0.000154946	0.992612	0.00544644	0.142249	ARHGAP29
ENSG00000138073	0.305574	0.120537	-0.254547	-0.0131614	5.06646	0.00433581	0.270455	0.0257645	0.905584	PREB
ENSG00000138166	0.792289	-0.0465046	-0.21	-0.260416	5.07408	2.19729e-13	0.694552	0.0823298	0.0320959	DUSP5
ENSG00000138180	1.20419	0.0760288	0.557042	-0.182827	4.61354	3.04161e-25	0.56565	8.0524e-06	0.181642	CEP55
ENSG00000138182	0.762629	-0.0281112	0.40259	-0.0751689	4.72757	2.77108e-11	0.823008	0.000747886	0.551991	KIF20B
ENSG00000138193	-0.229923	-0.0476992	-0.31051	-0.0843271	5.75489	0.0109914	0.592853	0.000660889	0.345789	PLCE1
ENSG00000138356	1.33441	-0.00337236	-0.40302	-0.316631	4.95343	3.40903e-38	0.977254	0.00118785	0.00995476	AOX1
ENSG00000138380	-0.363442	-0.0913015	0.341188	-0.0437211	4.38141	0.00351198	0.448998	0.00294479	0.715306	CARF
ENSG00000138433	-0.219527	0.104354	0.252092	0.183652	5.52731	0.0252482	0.273811	0.00745093	0.0524327	CIR1
ENSG00000138434	-0.602192	-0.0260657	0.137554	0.0407509	9.00179	1.08568e-17	0.707434	0.0471927	0.556992	SSFA2
ENSG00000138613	-0.343483	0.149667	0.251697	0.303996	4.84547	0.00207999	0.157533	0.0163684	0.00353895	APH1B
ENSG00000138675	0.855351	-0.118817	-0.210257	-0.154904	6.65564	4.60641e-25	0.175888	0.0174405	0.0783914	FGF5
ENSG00000138678	-0.28229	0.0156592	0.202919	0.0355985	5.27873	0.00714008	0.87788	0.0427223	0.72627	GPAT3
ENSG00000138688	-0.181574	-0.178206	-0.018785	-0.116103	6.95561	0.0202743	0.0227887	0.80891	0.136678	KIAA1109
ENSG00000138764	-0.358831	0.0112188	0.198764	-0.0630176	6.17899	4.66494e-05	0.895995	0.0190745	0.465031	CCNG2
ENSG00000138829	-0.492336	-0.130601	-0.349937	-0.144337	5.41095	1.52688e-06	0.186495	0.000537954	0.144754	FBN2
ENSG00000139112	0.318535	0.0722018	0.242806	0.186718	6.61946	7.44518e-05	0.375756	0.00265293	0.0211494	GABARAPL1
ENSG00000139178	0.227282	0.174396	0.2747	0.152076	6.3767	0.00701845	0.0393993	0.00109887	0.0728005	C1RL
ENSG00000139278	1.41783	-0.071148	-0.37493	-0.331885	6.32043	1.58266e-59	0.461603	0.00016631	0.000807252	GLIPR1
ENSG00000139318	0.494738	0.055287	-0.135861	-0.183608	6.19202	4.8526e-09	0.525257	0.123894	0.0381939	DUSP6
ENSG00000139428	0.886056	0.296296	0.249821	0.170908	4.32351	1.00552e-12	0.0266405	0.0633423	0.208198	MMAB
ENSG00000139514	0.767009	0.121721	-0.334533	-0.195879	5.89002	5.29029e-16	0.223983	0.00142778	0.0579044	SLC7A1
ENSG00000139531	0.139159	0.28921	0.39637	0.384303	4.02316	0.330215	0.0393459	0.00420966	0.00555108	SUOX
ENSG00000139645	0.231124	-0.0819158	-0.174005	0.00899089	7.03788	0.00364098	0.311056	0.0323896	0.911005	ANKRD52
ENSG00000139651	-0.204621	0.193956	0.0675798	0.0699512	6.02013	0.0236822	0.0272219	0.445959	0.429838	ZNF740
ENSG00000139793	0.189576	-0.0640389	-0.218033	-0.142054	6.43819	0.0252225	0.457767	0.0124715	0.101402	MBNL2
ENSG00000139926	0.556136	0.0113726	-0.211044	-0.245905	6.39094	4.46331e-11	0.89659	0.0177733	0.00585594	FRMD6
ENSG00000140395	-0.241349	-0.152677	-0.147705	-0.234346	5.30592	0.0190002	0.134885	0.148065	0.0228271	WDR61
ENSG00000140416	0.302701	-0.112343	-0.368883	-0.273271	9.46289	1.16e-05	0.105296	1.21118e-07	8.54317e-05	TPM1
ENSG00000140455	-0.261917	0.019938	0.296321	0.203681	4.52224	0.030371	0.864856	0.00908427	0.0756767	USP3
ENSG00000140564	0.173334	-0.00323526	-0.30161	-0.0484596	8.49327	0.0147065	0.963822	2.73348e-05	0.497317	FURIN
ENSG00000140682	0.242398	0.076557	-0.310409	-0.0418599	6.58042	0.00315642	0.356163	0.000267476	0.616456	TGFB1I1
ENSG00000140718	-0.174962	-0.211065	-0.0608206	-0.0839789	6.07278	0.0488016	0.0179146	0.490239	0.341341	FTO
ENSG00000140854	0.373105	0.0884202	-0.296282	-0.0376058	5.09703	0.000256561	0.400239	0.0068805	0.723949	KATNB1
ENSG00000140859	0.199419	-0.00940375	-0.278865	-0.0902399	6.01111	0.0212986	0.914886	0.00192335	0.307939	KIFC3
ENSG00000141068	0.979971	0.0116697	0.124649	0.374075	4.3793	1.12505e-17	0.92743	0.324086	0.00226688	KSR1
ENSG00000141401	-0.497864	0.124366	0.344778	0.305411	4.64684	1.35875e-05	0.244636	0.000977107	0.00360061	IMPA2
ENSG00000141429	0.142587	-0.0501035	-0.159544	-0.176655	7.10998	0.0696682	0.528077	0.0458595	0.0271343	GALNT1
ENSG00000141449	-0.36999	-0.222509	0.0301383	-0.0346272	8.038	3.80125e-07	0.00215419	0.675597	0.631148	GREB1L
ENSG00000141469	-0.663487	0.0244632	0.539366	0.285297	5.62891	2.74007e-12	0.784599	4.30423e-10	0.00115567	SLC14A1
ENSG00000141504	-0.384955	0.0471888	0.269731	0.110478	5.75081	3.03297e-05	0.596672	0.00211862	0.213101	SAT2
ENSG00000141522	0.263801	-0.0183158	-0.284092	-0.082521	8.0054	0.000305864	0.803698	0.000134607	0.263745	ARHGDIA
ENSG00000141552	0.209363	0.027019	-0.25624	-0.0743406	5.25925	0.0337708	0.787979	0.0132405	0.463685	ANAPC11
ENSG00000141696	-0.00560674	-0.144139	-0.288721	-0.161653	6.72379	0.943746	0.0720005	0.000353792	0.043803	P3H4
ENSG00000141699	-0.0140349	0.219968	0.137748	0.259252	5.69054	0.884515	0.0202975	0.149183	0.00605296	RETREG3
ENSG00000141858	0.253718	0.0742879	-0.194235	-0.0200346	5.59445	0.00742216	0.440797	0.0494584	0.836666	SAMD1
ENSG00000142002	0.318132	-0.103609	-0.291362	-0.122826	6.22697	0.000187663	0.237773	0.00107511	0.16218	DPP9
ENSG00000142327	0.164529	-0.0204337	-0.323617	-0.174352	6.64553	0.0418175	0.802602	0.000103484	0.0345742	NA
ENSG00000142408	0.625139	-0.0134867	0.221941	0.133484	5.47886	8.39683e-11	0.894933	0.026272	0.184732	CACNG8
ENSG00000142669	0.256277	0.0423849	-0.226204	0.0161573	8.40037	0.000344204	0.555783	0.00180797	0.822413	SH3BGRL3
ENSG00000142871	1.49995	0.494733	-0.905834	-0.692816	8.34802	3.97374e-92	3.21401e-11	4.46004e-30	9.87226e-19	CYR61
ENSG00000142920	-0.330304	-0.0840362	-0.275068	-0.0522904	4.16526	0.0068196	0.478883	0.0236345	0.658196	AZIN2
ENSG00000143013	0.700068	-0.117265	-0.272286	-0.0171399	5.08486	5.19721e-12	0.2876	0.0153187	0.875088	LMO4
ENSG00000143033	0.295507	0.063589	0.315059	0.0213875	4.22872	0.0260043	0.642622	0.017616	0.876618	MTF2
ENSG00000143127	-0.575201	0.0185167	0.300899	0.143706	6.27698	8.2306e-11	0.827091	0.000305193	0.087414	ITGA10
ENSG00000143162	-0.369933	0.0960653	0.252498	0.1222	4.95345	0.00111097	0.37313	0.0173988	0.255799	CREG1
ENSG00000143179	0.262987	-0.0223984	-0.408431	-0.174413	4.95884	0.0198752	0.847974	0.000859156	0.142535	UCK2
ENSG00000143322	0.324685	-0.0663446	-0.121871	-0.19861	6.69046	5.19755e-05	0.418573	0.138784	0.0163078	ABL2
ENSG00000143341	-0.377637	-0.214046	-0.212497	-0.0513504	5.31366	0.000188966	0.0317031	0.0330332	0.600538	HMCN1
ENSG00000143367	0.417118	-0.287613	-0.262768	-0.187957	4.53331	0.00057518	0.0299247	0.0467322	0.150457	TUFT1
ENSG00000143549	0.157109	-0.0524269	-0.169437	-0.142784	7.41625	0.041956	0.501632	0.0309087	0.0684524	TPM3
ENSG00000143553	-0.0916647	0.213599	0.183677	0.249891	5.26274	0.379263	0.0349407	0.0706638	0.0132669	SNAPIN
ENSG00000143641	0.399572	0.00955458	-0.197383	-0.107445	8.40144	2.1725e-08	0.894363	0.0063908	0.136568	GALNT2
ENSG00000143772	-0.67452	-0.0597876	-0.0380643	0.212993	5.09063	2.12302e-10	0.548744	0.702159	0.0284084	ITPKB
ENSG00000143819	-0.572396	0.0629724	0.169567	0.17129	6.94049	1.54056e-12	0.420536	0.0293343	0.0276684	EPHX1
ENSG00000144026	-0.285768	-0.301196	0.117239	-0.0396693	4.48768	0.0160559	0.0114618	0.301604	0.731119	ZNF514
ENSG00000144560	-0.0837789	0.0817745	0.187979	0.196075	6.25028	0.336864	0.343341	0.0282956	0.0220259	VGLL4
ENSG00000144647	-0.0267499	0.294714	0.27451	0.333201	4.49876	0.830955	0.0146434	0.0233973	0.00555345	POMGNT2
ENSG00000144824	0.935527	-0.0557653	-0.274155	-0.159329	6.16569	6.37157e-26	0.560577	0.00508372	0.0994775	PHLDB2
ENSG00000144827	-0.221877	-0.054048	-0.102709	-0.292125	5.36827	0.0269595	0.584396	0.301119	0.00387259	ABHD10
ENSG00000145022	-0.344311	-0.00762056	-0.372393	-0.120188	4.95899	0.00247581	0.944613	0.00113535	0.279064	TCTA
ENSG00000145041	-0.270258	-0.348073	-0.0608892	-0.194845	5.04935	0.0119366	0.00135179	0.563229	0.0679947	DCAF1
ENSG00000145246	0.972833	-0.0192155	-0.07228	-0.250651	6.72724	2.48213e-32	0.825139	0.407935	0.00462017	ATP10D
ENSG00000145247	0.389138	-0.0100991	-0.211438	-0.0086763	5.29623	4.74278e-05	0.918962	0.036888	0.930323	OCIAD2
ENSG00000145632	-0.163317	0.000174382	-0.186648	-0.180354	9.20772	0.018859	0.997995	0.00732277	0.00954197	PLK2
ENSG00000145685	0.323015	0.0682625	0.178014	0.056119	6.55731	7.45835e-05	0.4096	0.0305038	0.498087	LHFPL2
ENSG00000145687	-0.809917	0.0553251	0.185489	0.0892515	5.56163	4.26354e-16	0.547401	0.0416107	0.330304	SSBP2
ENSG00000145734	-0.209055	-0.193084	-0.010112	-0.174859	5.85315	0.0253441	0.0388719	0.912541	0.0609317	BDP1
ENSG00000145833	0.0160398	-0.172923	0.0303215	-0.18927	6.30204	0.852099	0.0476233	0.724599	0.0303383	DDX46
ENSG00000146411	-0.883135	0.102996	0.2605	0.194849	5.46627	9.50304e-18	0.271088	0.00482808	0.0358756	SLC2A12
ENSG00000147027	0.299467	-0.126502	-0.322414	-0.297484	6.3415	0.000487157	0.153265	0.000341938	0.000921873	TMEM47
ENSG00000147065	0.321447	-0.00397769	-0.17544	-0.0827999	9.2474	3.64699e-06	0.954485	0.0120867	0.235383	MSN
ENSG00000147162	-0.223943	-0.192942	0.113885	-0.0458882	8.64374	0.00148167	0.00615478	0.103949	0.513414	OGT
ENSG00000147669	0.0838439	-0.233226	-0.144658	-0.286123	4.86647	0.448347	0.042246	0.203355	0.0132497	POLR2K
ENSG00000147883	-0.184398	0.0584247	0.186095	0.0370852	7.05794	0.0177069	0.447606	0.0150572	0.630055	CDKN2B
ENSG00000147955	0.552967	-0.00245486	-0.185607	-0.028556	6.19792	1.08713e-10	0.978005	0.0400305	0.748874	SIGMAR1
ENSG00000148143	-0.127256	0.0430285	0.258722	0.260713	5.25132	0.227993	0.678667	0.0109827	0.0103144	ZNF462
ENSG00000148154	1.10461	0.0990998	-0.157315	-0.193999	7.84574	7.23908e-50	0.194115	0.0415571	0.0120873	UGCG
ENSG00000148484	0.147463	-0.00700389	-0.261275	-0.237122	6.3155	0.098577	0.938274	0.00469828	0.0100922	RSU1
ENSG00000148677	1.69687	-0.00855235	-0.873096	-0.80336	5.87878	1.97837e-58	0.945718	5.99727e-10	8.47561e-09	ANKRD1
ENSG00000148773	1.31441	-0.00944431	0.0738732	-0.19715	6.07536	3.34856e-49	0.923507	0.449333	0.0489835	MKI67
ENSG00000148841	0.395203	0.135193	0.219511	0.234985	6.48135	1.39449e-06	0.103988	0.00799828	0.00447227	ITPRIP
ENSG00000148842	-0.194075	0.0883061	0.364428	0.291451	4.65657	0.0898039	0.426216	0.000725757	0.00726175	CNNM2
ENSG00000148848	1.23138	-0.0966339	-0.424303	0.0010421	4.62189	3.56491e-28	0.457928	0.00181502	0.993532	ADAM12
ENSG00000149260	-0.192769	0.12815	0.122479	0.273324	5.89521	0.0361515	0.153361	0.172704	0.00208015	CAPN5
ENSG00000149591	1.86299	-0.0515184	-0.418092	-0.492699	6.90822	1.58403e-114	0.56734	6.88392e-06	1.38408e-07	TAGLN
ENSG00000149809	-0.248742	0.235219	0.0867364	0.257308	4.67618	0.0389716	0.039141	0.454769	0.0236631	TM7SF2
ENSG00000150787	-0.0425182	-0.0372333	-0.356215	-0.279814	4.18542	0.747551	0.778307	0.009881	0.0403839	PTS
ENSG00000150938	0.334704	-0.0396456	-0.499448	-0.31524	9.34063	1.52076e-06	0.570879	1.62171e-12	7.43049e-06	CRIM1
ENSG00000151012	-0.302447	-0.00920436	0.277783	0.0358118	7.35131	0.000159142	0.907108	0.000360599	0.649061	SLC7A11
ENSG00000151388	0.882647	0.00958514	-0.292109	-0.202851	7.08879	1.56583e-29	0.906129	0.00042162	0.0137332	ADAMTS12
ENSG00000151445	-0.0838214	0.0946939	0.249002	0.243944	4.9808	0.442983	0.377712	0.0184853	0.020977	VIPAS39
ENSG00000151458	-0.443127	-0.0587935	0.174416	0.0345786	6.13746	6.84773e-07	0.497704	0.0410175	0.688036	ANKRD50
ENSG00000151474	0.0725145	-0.0502599	-0.182809	-0.21412	6.5392	0.379476	0.545817	0.0294607	0.0108922	FRMD4A
ENSG00000151746	0.210513	-0.0711005	0.156003	0.101518	7.26325	0.00676868	0.367008	0.0454631	0.193953	BICD1
ENSG00000151789	-1.13704	-0.0399108	0.257375	0.110052	5.24968	1.95056e-25	0.681261	0.00656939	0.250837	ZNF385D
ENSG00000151914	-0.270809	-0.263293	-0.2228	-0.181221	9.09101	9.51027e-05	0.000148118	0.00131438	0.00891135	DST
ENSG00000152082	0.320347	0.344586	-0.0291951	0.208236	5.37806	0.00125112	0.000512038	0.776499	0.0381005	MZT2B
ENSG00000152223	0.283612	-0.0983994	-0.197694	-0.209156	6.4246	0.000822326	0.25851	0.0242939	0.0172105	EPG5
ENSG00000152465	0.929119	-0.0191827	-0.189014	-0.121005	6.45307	1.29055e-29	0.825139	0.0316492	0.166482	NMT2
ENSG00000152495	-0.360978	-0.0403479	-0.264371	-0.305079	4.55318	0.0057258	0.748065	0.0409669	0.0188491	CAMK4
ENSG00000152684	0.326614	0.194651	-0.0837633	0.0456203	5.59929	0.000703253	0.0461994	0.403538	0.64482	PELO
ENSG00000152952	0.422341	-0.00243955	-0.174658	-0.239451	9.65055	8.50206e-10	0.971824	0.0116621	0.000551653	PLOD2
ENSG00000153094	-1.06824	0.225246	0.643157	0.298079	4.47016	1.39495e-15	0.047988	3.65608e-09	0.00832425	BCL2L11
ENSG00000153132	0.199784	0.00582666	0.234841	0.111667	6.53977	0.0145307	0.94386	0.00403843	0.174367	CLGN
ENSG00000153179	-0.57763	-0.139164	-0.26837	-0.0631596	5.5111	4.52301e-09	0.141248	0.00507531	0.501364	RASSF3
ENSG00000153395	0.109232	-0.086074	-0.215405	-0.307972	6.78421	0.160098	0.273086	0.00646065	0.000106499	LPCAT1
ENSG00000153823	-1.11055	-0.0715493	0.202803	0.0582402	5.08889	2.91515e-23	0.473506	0.0372133	0.554626	PID1
ENSG00000153904	0.413583	-0.127505	-0.532532	-0.40115	6.77453	1.04925e-06	0.147133	4.80165e-09	8.09052e-06	DDAH1
ENSG00000153936	0.390194	0.142631	0.183186	0.105399	6.00994	1.75609e-05	0.124069	0.0476022	0.257129	HS2ST1
ENSG00000153956	0.690403	0.123615	-0.0925717	-0.198598	8.63928	4.83083e-22	0.0869023	0.202506	0.00641521	CACNA2D1
ENSG00000153993	-0.560544	-0.0570471	0.199452	0.0312563	6.26224	1.6791e-09	0.522588	0.0227686	0.724272	SEMA3D
ENSG00000154027	-1.08158	-0.105824	-0.156609	-0.0746082	6.75677	3.63317e-39	0.173635	0.044636	0.336651	AK5
ENSG00000154096	0.227721	0.0813581	-0.251358	-0.0552166	7.57291	0.00245166	0.281876	0.00104819	0.467543	THY1
ENSG00000154114	-0.306937	-0.249452	-0.0952821	-0.0988896	4.48161	0.0146707	0.0461379	0.437741	0.420362	TBCEL
ENSG00000154127	1.05255	0.00364087	-0.301193	0.0284782	4.92778	5.16705e-21	0.976958	0.0216465	0.820648	UBASH3B
ENSG00000154310	-0.104516	-0.059569	-0.226888	-0.216309	5.43839	0.283876	0.540185	0.0217386	0.0283937	TNIK
ENSG00000154358	-0.489511	0.0254135	0.196423	0.240833	4.42282	7.46639e-05	0.82699	0.0851523	0.0337483	OBSCN
ENSG00000154380	0.212512	-0.0255769	-0.180768	-0.129293	6.47872	0.014037	0.771519	0.0426597	0.14523	ENAH
ENSG00000154429	-0.419546	-0.269484	-0.0174835	-0.124317	4.02693	0.00213833	0.044626	0.892967	0.344889	CCSAP
ENSG00000154556	-0.782986	-0.0385174	-0.349971	-0.105826	4.83514	7.80185e-12	0.714591	0.00132629	0.318329	SORBS2
ENSG00000154678	0.379457	-0.148052	-0.493885	-0.293959	6.7787	4.13089e-06	0.0822884	1.65522e-08	0.000639453	PDE1C
ENSG00000154721	-0.323897	0.028461	0.265401	0.214838	4.65559	0.00731823	0.806147	0.0188153	0.0584127	JAM2
ENSG00000155252	0.260104	-0.134361	-0.194681	-0.00190441	5.73629	0.00465423	0.157853	0.0419369	0.983837	PI4K2A
ENSG00000155755	0.306291	0.0279151	-0.19014	-0.153722	5.85787	0.00086786	0.766988	0.0478982	0.108292	TMEM237
ENSG00000156515	0.265636	0.0184097	-0.177927	-0.101301	8.32446	0.000213054	0.798611	0.0142107	0.161672	HK1
ENSG00000156535	-0.33113	-0.240096	-0.0719898	-0.174498	6.00753	0.000202496	0.0067091	0.410466	0.0476158	CD109
ENSG00000157020	0.224286	0.0248481	-0.158631	-0.067928	7.55989	0.00286354	0.743055	0.0378695	0.371929	SEC13
ENSG00000157216	-0.56909	-0.00398373	0.227533	0.222458	5.06935	3.96555e-07	0.969894	0.0274015	0.031008	SSBP3
ENSG00000157227	1.01328	0.0809498	0.201864	0.209759	9.88385	4.365e-49	0.238876	0.00328499	0.00224998	MMP14
ENSG00000157240	-0.554288	0.0931038	0.306765	0.164638	8.15079	1.90924e-14	0.190426	1.4959e-05	0.020421	FZD1
ENSG00000157600	-0.537563	0.0332274	0.2658	0.124595	6.71306	3.57632e-11	0.672681	0.000639117	0.111564	TMEM164
ENSG00000157827	-0.599392	-0.147082	0.140912	0.0181471	7.41452	2.88617e-15	0.0482306	0.0560659	0.806327	FMNL2
ENSG00000158258	1.03803	0.215821	0.180361	0.212708	6.954	2.00851e-34	0.015545	0.0438325	0.0171104	CLSTN2
ENSG00000158615	0.219314	0.0979041	0.248903	0.130975	5.51651	0.0268435	0.329168	0.0119075	0.190253	PPP1R15B
ENSG00000159069	0.21813	0.183288	-0.10985	0.0672525	6.78099	0.00650775	0.0225673	0.178824	0.405509	FBXW5
ENSG00000159111	-0.0888274	0.194454	-0.0185251	0.224485	5.50854	0.356979	0.0389551	0.846961	0.0168464	MRPL10
ENSG00000159131	0.322308	-0.0790183	-0.201915	-0.176034	5.82488	0.000492375	0.409462	0.0372629	0.0685182	GART
ENSG00000159176	0.387699	-0.00245721	-0.238526	-0.0768969	7.6094	3.51802e-07	0.974652	0.00230132	0.32166	CSRP1
ENSG00000159199	0.332966	-0.26925	-0.554411	-0.231593	4.61143	0.00351275	0.0281504	1.32973e-05	0.0577511	ATP5G1
ENSG00000159363	0.471849	0.0429087	-0.256059	-0.0387406	5.90761	2.04079e-07	0.648251	0.00808481	0.68251	ATP13A2
ENSG00000159784	0.551058	0.336684	0.262105	0.20111	4.5616	2.56749e-06	0.00511514	0.0308319	0.0997145	FAM131B
ENSG00000159792	0.184073	0.179945	-0.0400327	0.0508244	5.93182	0.0428893	0.0480964	0.665918	0.5805	PSKH1
ENSG00000159840	0.650597	0.0988764	-0.290807	0.00949262	8.6741	6.43341e-20	0.168655	6.22272e-05	0.895079	ZYX
ENSG00000160293	0.127416	-0.0674426	-0.201365	-0.245162	5.36023	0.198752	0.504986	0.0496796	0.0172864	VAV2
ENSG00000160789	-0.323112	0.0217787	-0.159118	-0.0445439	9.55197	3.09758e-06	0.752	0.0212798	0.518397	LMNA
ENSG00000160972	0.22476	0.150884	-0.267436	0.100795	4.78825	0.0447357	0.182072	0.0243724	0.375259	PPP1R16A
ENSG00000161010	-0.25118	-0.0255295	0.248434	0.0732379	4.65595	0.0301464	0.821338	0.0235951	0.512286	MRNIP
ENSG00000161638	0.568288	0.0486892	-0.145738	-0.0596099	9.70094	1.20726e-16	0.478932	0.034514	0.386612	ITGA5
ENSG00000161682	-0.5951	0.187786	0.0283988	0.267671	5.07259	1.3607e-08	0.0530076	0.773179	0.00547093	FAM171A2
ENSG00000162407	-1.73142	-0.231827	-0.303699	-0.151224	7.34255	9.22262e-99	0.00197145	5.32589e-05	0.0428422	PLPP3
ENSG00000162496	0.39375	0.250354	0.204571	0.285777	8.40797	2.65595e-08	0.000417227	0.0039623	5.56264e-05	DHRS3
ENSG00000162591	0.302812	0.0963455	-0.195789	0.0233382	9.14607	1.19147e-05	0.164391	0.00490967	0.736479	MEGF6
ENSG00000162613	-0.164148	-0.205384	-0.0998351	-0.0930672	6.7716	0.0431649	0.0116817	0.217551	0.249937	FUBP1
ENSG00000162614	0.625837	-0.316519	-0.260485	-0.391329	5.49546	1.37427e-10	0.00308372	0.0143312	0.000283991	NEXN
ENSG00000162704	0.0647446	-0.0792402	-0.279284	-0.208419	7.59871	0.393408	0.299373	0.000291036	0.00664737	ARPC5
ENSG00000162734	0.201199	-0.0241234	-0.428485	-0.249272	7.99068	0.00590606	0.743068	9.89284e-09	0.000777743	PEA15
ENSG00000162840	1.45076	0.145581	-0.233144	0.102466	5.60011	1.02678e-56	0.149637	0.0264552	0.312434	NA
ENSG00000163191	0.394734	0.0382878	-0.269885	-0.0992643	7.24117	2.98972e-07	0.62457	0.000689194	0.207551	S100A11
ENSG00000163251	-0.94581	-0.0128865	-0.0959147	-0.251382	4.38135	9.15917e-13	0.912871	0.42033	0.0380359	FZD5
ENSG00000163346	-0.405977	0.0697176	0.137348	0.162922	8.83199	8.69244e-09	0.318414	0.0491489	0.0195633	PBXIP1
ENSG00000163430	0.264481	0.00362223	-0.15534	-0.118404	9.08574	0.000144307	0.958632	0.0265604	0.0906482	FSTL1
ENSG00000163462	-0.277463	-0.277012	-0.125256	-0.114311	4.56543	0.0163837	0.0167408	0.271117	0.314177	TRIM46
ENSG00000163481	0.309864	0.307607	0.205048	0.10978	4.37604	0.0196817	0.020852	0.128728	0.421345	RNF25
ENSG00000163510	-0.34871	-0.123711	-0.00517576	-0.224579	4.8052	0.00243408	0.270446	0.962752	0.0479147	CWC22
ENSG00000163539	-0.244705	0.101363	0.206549	0.0858762	5.64712	0.0115578	0.281144	0.0267876	0.361745	CLASP2
ENSG00000163565	-0.028161	0.0638314	0.29713	0.167243	6.62875	0.727574	0.427796	0.000188598	0.0366906	IFI16
ENSG00000163629	-0.233548	0.0124825	0.224695	0.117396	6.03036	0.0106081	0.889314	0.0109527	0.186958	PTPN13
ENSG00000163661	0.989878	-0.0675326	-0.369707	-0.279589	5.86984	1.37032e-25	0.515973	0.000580601	0.0085358	PTX3
ENSG00000163704	-0.35493	0.228647	0.230176	0.239244	5.33201	0.000593949	0.0193331	0.0185734	0.0142729	PRRT3
ENSG00000163710	0.36314	-0.280757	0.0181094	0.0105582	4.07161	0.00447234	0.0435369	0.89231	0.937087	PCOLCE2
ENSG00000163728	-0.376142	-0.177227	0.150943	-0.0491646	6.07083	2.63088e-05	0.0444375	0.0797236	0.573352	TTC14
ENSG00000163755	-0.276893	0.0283436	0.328301	0.0992771	6.41317	0.000860792	0.728331	4.377e-05	0.221828	HPS3
ENSG00000163788	-0.337442	0.00924634	0.389396	0.115897	5.61415	0.000420487	0.920704	1.5764e-05	0.208005	SNRK
ENSG00000163870	-0.222078	0.0651889	-0.217243	-0.0135434	5.69643	0.0179527	0.477071	0.0207812	0.883294	TPRA1
ENSG00000163931	-0.664563	0.114466	0.0635234	0.163344	10.4475	1.59596e-22	0.0898546	0.34664	0.0154897	TKT
ENSG00000163947	-0.737439	-0.13204	0.407709	0.094003	5.16299	2.41472e-12	0.181925	1.54451e-05	0.331638	ARHGEF3
ENSG00000164023	0.68181	-0.0235609	-0.309485	-0.286154	5.96753	1.57743e-13	0.810125	0.00216116	0.00444256	SGMS2
ENSG00000164039	0.0731043	0.266279	0.510075	0.24334	4.10897	0.584318	0.0414755	5.7671e-05	0.0631154	BDH2
ENSG00000164066	-0.356339	-0.0367057	0.266941	0.117827	4.29051	0.00661589	0.771126	0.0282228	0.341028	INTU
ENSG00000164096	-0.068161	-0.0578071	-0.164658	-0.153059	8.32563	0.342824	0.421148	0.0223535	0.0336237	C4orf3
ENSG00000164099	0.252608	0.0368142	-0.224807	-0.116356	6.58492	0.00189464	0.65495	0.00729907	0.161717	PRSS12
ENSG00000164105	-0.6962	-0.0513281	-0.231599	-0.280227	5.72433	1.00779e-12	0.577334	0.0133392	0.00285313	SAP30
ENSG00000164111	0.182578	-0.0255113	-0.184673	-0.174409	9.84881	0.00759852	0.709654	0.00715027	0.0110586	ANXA5
ENSG00000164161	0.46114	0.100493	-0.272119	0.0424881	5.5377	2.42882e-06	0.320869	0.00970704	0.676376	HHIP
ENSG00000164300	0.266733	0.0709855	0.219701	0.141243	5.49609	0.00604918	0.473547	0.0245858	0.151057	SERINC5
ENSG00000164442	0.225026	0.0864502	-0.190531	-0.11686	8.17918	0.00201528	0.237381	0.00986568	0.112468	CITED2
ENSG00000164574	0.397465	-0.0109768	-0.307934	-0.191227	9.56795	7.25839e-09	0.873459	8.70919e-06	0.00564734	GALNT10
ENSG00000164741	1.01288	0.190786	-0.0259996	-0.00875542	6.8851	3.18746e-35	0.0254699	0.764265	0.919418	DLC1
ENSG00000164877	-0.235928	-0.246798	-0.191283	-0.0461628	4.88905	0.037313	0.0298755	0.0904416	0.677594	MICALL2
ENSG00000164880	0.184548	-0.000425277	-0.215088	0.0093324	7.18262	0.017115	0.995655	0.00645802	0.904825	INTS1
ENSG00000164951	0.248435	-0.0666798	-0.185909	-0.139228	6.81601	0.00163499	0.4057	0.0213446	0.0837542	PDP1
ENSG00000165006	0.284621	0.219862	0.0944583	0.103934	5.98842	0.00140863	0.0141978	0.296888	0.250451	UBAP1
ENSG00000165029	-0.553674	0.0316717	0.426905	0.31375	5.85319	1.27612e-09	0.716189	4.974e-07	0.00024158	ABCA1
ENSG00000165072	-0.758737	-0.247168	-0.0552213	0.0230318	4.67487	9.53584e-11	0.0252623	0.609807	0.829909	MAMDC2
ENSG00000165097	-0.302254	-0.131036	-0.390296	-0.0682626	4.5066	0.0142708	0.278773	0.0018019	0.569543	KDM1B
ENSG00000165233	-0.140998	0.0768118	0.227156	0.282623	6.77706	0.0733081	0.324442	0.00336225	0.000254315	CARD19
ENSG00000165475	-0.35038	-0.152386	-0.264301	-0.171977	4.05522	0.00717829	0.231211	0.0408006	0.177598	CRYL1
ENSG00000165476	0.219179	0.00336533	-0.117576	-0.153972	7.45878	0.00360097	0.964649	0.123503	0.043967	REEP3
ENSG00000165655	0.268427	0.14597	0.0533201	0.337285	4.50919	0.03013	0.246154	0.675568	0.00608036	ZNF503
ENSG00000165732	0.251818	-0.0949381	-0.123567	-0.186385	7.06843	0.00175073	0.247507	0.133112	0.0239635	DDX21
ENSG00000165912	-0.440104	-0.154219	-0.312196	-0.00754464	5.14616	8.28249e-06	0.108843	0.00139283	0.93663	PACSIN3
ENSG00000166037	-0.239184	-0.00241927	0.19635	0.0441237	5.8457	0.00825787	0.978304	0.0251703	0.618603	CEP57
ENSG00000166073	0.836279	0.00348345	-0.246948	-0.109829	6.52816	1.07541e-22	0.969182	0.00732924	0.227335	GPR176
ENSG00000166147	0.384044	-0.21053	-0.395818	-0.153283	9.69558	2.22408e-08	0.00229808	1.11872e-08	0.0262966	FBN1
ENSG00000166313	0.283407	0.191752	0.0557712	0.147312	5.43973	0.00306893	0.0471483	0.568649	0.1287	APBB1
ENSG00000166340	-0.141088	0.0218669	0.155063	0.11514	8.73758	0.0448722	0.75522	0.0267523	0.100163	TPP1
ENSG00000166503	0.190889	-0.126931	-0.203402	-0.127496	5.57125	0.0438375	0.19326	0.0385909	0.191204	HDGFRP3
ENSG00000166710	-0.233494	-0.0254514	0.16915	0.0319645	10.0474	0.000610997	0.708202	0.0127706	0.638173	B2M
ENSG00000166922	1.54069	-0.269756	-0.160335	-0.355489	5.35534	5.86804e-53	0.0252378	0.177978	0.00351529	SCG5
ENSG00000166923	1.16399	-0.0501611	-0.185278	-0.30142	8.08317	1.49427e-53	0.523028	0.0191845	0.000152479	GREM1
ENSG00000167074	0.243745	0.0895192	0.238638	0.199952	5.22361	0.0130692	0.369485	0.0153171	0.0427927	TEF
ENSG00000167085	0.22809	-0.0967072	-0.259658	-0.0957935	4.80195	0.0409115	0.404145	0.0281326	0.40842	PHB
ENSG00000167106	0.154617	0.218401	0.23406	0.277247	5.64129	0.110077	0.0233987	0.0150287	0.00381702	FAM102A
ENSG00000167323	-0.522696	0.0952041	0.196149	0.0914445	5.70383	4.89663e-08	0.294778	0.0296563	0.314308	STIM1
ENSG00000167460	0.427446	-0.0289527	-0.288887	-0.178407	8.75597	1.76627e-09	0.686135	6.27046e-05	0.0131226	TPM4
ENSG00000167552	-1.20036	-0.54656	1.64456	0.854161	8.37544	1.17744e-53	3.41742e-13	2.89139e-114	3.27835e-32	TUBA1A
ENSG00000167553	-0.894734	-0.392012	0.617326	0.468213	5.13429	6.04875e-13	0.000795819	3.83473e-09	1.04827e-05	TUBA1C
ENSG00000167601	0.342849	0.04646	-0.22859	-0.0108769	8.86796	1.01346e-06	0.509494	0.0012546	0.877396	AXL
ENSG00000167645	0.46258	0.119093	-0.345843	-0.106287	6.18269	5.87371e-08	0.172576	0.000134189	0.231179	YIF1B
ENSG00000167680	0.22967	0.265209	0.198243	0.257595	5.98123	0.0102324	0.0029789	0.0272353	0.00393323	SEMA6B
ENSG00000167702	-0.333355	-0.135064	-0.221336	-0.0961298	5.82469	0.000223204	0.129001	0.0135305	0.278393	KIFC2
ENSG00000167747	0.338653	0.103264	-0.335972	0.141478	5.1898	0.000906463	0.323532	0.0022005	0.17441	C19orf48
ENSG00000167767	0.438214	-0.0589446	-0.664617	-0.351831	5.75758	2.36354e-06	0.543282	1.16729e-10	0.000419071	KRT80
ENSG00000167797	0.327208	0.161387	-0.32827	-0.0406108	5.28513	0.00102584	0.11131	0.00208657	0.694439	CDK2AP2
ENSG00000167964	-1.20161	0.276877	0.469123	0.471075	4.78557	1.85465e-22	0.00770587	4.30202e-06	3.84109e-06	RAB26
ENSG00000167996	-0.522179	0.155572	-0.352564	0.0557714	9.32746	8.95198e-14	0.024566	4.34909e-07	0.420778	FTH1
ENSG00000168140	-0.0555182	0.162715	-0.0271354	0.182772	6.65078	0.494144	0.0427302	0.738099	0.0226835	VASN
ENSG00000168209	-1.05203	0.0961659	0.277432	0.327555	5.16267	1.82077e-19	0.34827	0.00591415	0.00108694	DDIT4
ENSG00000168216	-0.34479	0.00682817	0.222226	0.171436	6.12216	9.48085e-05	0.936807	0.00887719	0.0441052	LMBRD1
ENSG00000168234	0.056527	0.284089	0.269876	0.305253	4.04528	0.69342	0.0415069	0.0534046	0.0280199	TTC39C
ENSG00000168268	0.253815	0.0212937	-0.230107	-0.0916835	7.79035	0.000530376	0.772858	0.00199636	0.215647	NT5DC2
ENSG00000168297	-0.374448	0.00779669	0.247159	0.137733	6.53245	9.91959e-06	0.924874	0.00244903	0.0931795	PXK
ENSG00000168301	-0.944356	-0.00339734	0.232905	0.0699549	5.30871	5.47132e-19	0.971884	0.013682	0.464963	KCTD6
ENSG00000168411	0.341171	-0.0676903	-0.27821	-0.110154	4.99342	0.00169301	0.552026	0.0171635	0.335363	RFWD3
ENSG00000168461	0.7184	0.0492878	0.23826	0.262828	6.25557	3.06473e-17	0.579392	0.00661926	0.00268125	RAB31
ENSG00000168672	-0.22425	-0.140076	-0.331645	-0.342216	4.64234	0.0469628	0.210993	0.00379509	0.00282752	FAM84B
ENSG00000168874	-0.931362	-0.00876071	0.0848472	0.34645	5.59705	6.1316e-17	0.930753	0.39594	0.000381715	ATOH8
ENSG00000168906	-0.385414	-0.152965	0.112864	0.0784239	7.63135	3.55109e-07	0.0413622	0.128702	0.291526	MAT2A
ENSG00000168916	-0.968248	0.0262202	0.269313	0.0765936	4.87607	3.05523e-16	0.804144	0.00908156	0.466393	ZNF608
ENSG00000168994	0.486154	-0.117027	-0.550597	-0.457303	5.00629	2.2408e-06	0.285078	1.75033e-06	5.85634e-05	PXDC1
ENSG00000169047	-0.665545	0.0334194	-0.282844	-0.0437092	6.17681	4.8827e-14	0.690537	0.000981553	0.604332	IRS1
ENSG00000169169	-0.405479	0.162998	0.0223032	0.213376	5.04628	0.000158395	0.107721	0.828227	0.0343192	CPT1C
ENSG00000169184	0.70859	0.102017	-0.419474	-0.130585	4.36789	7.02544e-08	0.473532	0.00616169	0.373953	MN1
ENSG00000169375	-0.249767	0.0503511	0.170837	0.0627963	6.38528	0.00364041	0.549956	0.0410481	0.455496	SIN3A
ENSG00000169710	1.01343	-0.0234487	-0.16852	0.0673654	7.32425	8.03291e-41	0.765023	0.0330422	0.388406	FASN
ENSG00000169750	0.578378	0.296777	-0.0879528	0.0278286	4.50106	6.89591e-07	0.0137676	0.486304	0.822999	RAC3
ENSG00000169760	0.333271	0.192496	0.276357	0.19459	4.20827	0.0122104	0.15588	0.0395595	0.151192	NLGN1
ENSG00000169855	0.179981	0.053628	0.120711	0.168073	6.85745	0.0237813	0.503633	0.130996	0.0349789	ROBO1
ENSG00000170043	0.235986	0.113607	-0.242182	0.00332062	6.16868	0.00690553	0.197756	0.00760726	0.970211	TRAPPC1
ENSG00000170271	-0.347682	0.105037	0.310184	0.147376	5.37317	0.000286148	0.254692	0.000633704	0.108735	FAXDC2
ENSG00000170312	1.04039	-0.139823	-0.637142	-0.365228	4.13894	9.53988e-18	0.319385	2.33802e-05	0.0116509	CDK1
ENSG00000170412	-0.257167	0.114449	0.0807621	0.202448	4.87047	0.0169011	0.269653	0.437792	0.0488254	GPRC5C
ENSG00000170421	0.465228	0.0908529	-0.184188	-0.0764178	7.99293	2.51638e-10	0.221589	0.0141789	0.306696	KRT8
ENSG00000170540	-0.29767	-0.0294101	-0.164144	0.0199823	6.89273	0.000222678	0.711369	0.0404228	0.800984	ARL6IP1
ENSG00000170545	0.74017	0.231903	0.0866207	0.288628	4.27851	3.61164e-09	0.0828364	0.525178	0.0296253	SMAGP
ENSG00000170571	0.112005	-0.0860887	-0.276881	-0.194777	6.37285	0.188518	0.319221	0.00159514	0.0253495	EMB
ENSG00000170776	0.292632	-0.228185	0.107581	-0.0135651	5.61941	0.00161469	0.0189609	0.254338	0.886839	AKAP13
ENSG00000170873	-0.507517	0.0856033	0.469318	0.235029	4.00282	0.00013256	0.487615	6.93173e-05	0.052282	MTSS1
ENSG00000170892	-0.208835	0.00881431	-0.200343	-0.0227857	5.98847	0.0185329	0.919606	0.0239985	0.794588	TSEN34
ENSG00000171067	0.443146	-0.0683078	-0.386774	-0.196389	6.05798	9.07437e-07	0.467913	6.61908e-05	0.0390455	C11orf24
ENSG00000171163	-0.201775	-0.196486	-0.0721332	0.0213094	5.57268	0.0289048	0.0335201	0.430521	0.814347	ZNF692
ENSG00000171223	0.331876	0.491981	0.0313964	-0.0665143	5.2164	0.00222434	4.18391e-06	0.779842	0.557761	JUNB
ENSG00000171310	0.281899	0.139184	0.128812	0.181238	6.26667	0.00162955	0.124211	0.155289	0.0445743	CHST11
ENSG00000171503	-0.342818	-0.245121	-0.17314	-0.256341	4.25315	0.00802689	0.0553695	0.172313	0.0453546	ETFDH
ENSG00000171552	0.436238	0.16228	-0.0105695	0.0875775	7.0453	1.90662e-08	0.0388524	0.893892	0.266552	BCL2L1
ENSG00000171793	0.539839	-0.239408	-0.818719	-0.595646	4.63257	6.47081e-06	0.0695586	9.98983e-09	1.66456e-05	CTPS1
ENSG00000171848	1.41305	0.127556	-0.367977	-0.197604	5.40219	6.09e-48	0.241559	0.00141339	0.0800812	RRM2
ENSG00000171862	-0.22593	-0.00883935	0.162285	0.0701855	6.97963	0.00447138	0.910493	0.0375218	0.37019	PTEN
ENSG00000171877	0.540192	0.0173013	-0.273755	-0.03211	4.09815	1.49205e-05	0.896774	0.0484294	0.810861	FRMD5
ENSG00000171951	-0.715665	-0.106067	0.439348	0.0460765	6.78534	2.06823e-18	0.178558	1.16428e-08	0.555954	SCG2
ENSG00000172009	0.364615	0.100092	-0.355703	-0.114755	5.67621	0.000118256	0.302199	0.000454879	0.246193	THOP1
ENSG00000172115	0.447857	-0.287895	-0.376588	-0.323498	5.05701	3.58963e-05	0.0145709	0.00158306	0.00625663	CYCS
ENSG00000172273	-0.249291	-0.250948	-0.0422923	-0.0752899	4.3849	0.0419129	0.0409826	0.724011	0.530834	HINFP
ENSG00000172301	-0.249311	0.00916249	0.226531	0.0474355	6.4633	0.00285628	0.911349	0.00533858	0.563395	COPRS
ENSG00000172380	0.205387	-0.0203821	-0.166561	-0.163577	8.70768	0.00360043	0.773612	0.0191522	0.0213831	GNG12
ENSG00000172757	0.344559	0.0534104	-0.339512	-0.101021	9.57943	5.91894e-07	0.44007	1.08655e-06	0.14505	CFL1
ENSG00000172869	-0.215314	-0.204554	-0.0527068	-0.106538	5.71425	0.0214989	0.0289953	0.568809	0.251272	DMXL1
ENSG00000172965	-0.0550826	-0.000597136	-0.231116	-0.251892	5.01094	0.596709	0.995403	0.0296572	0.0179399	MIR4435-2HG
ENSG00000173068	0.24733	-0.196089	-0.0422182	-0.1306	6.05677	0.00460569	0.0299887	0.636315	0.146107	BNC2
ENSG00000173209	-0.241365	-0.196293	0.100927	-0.0737714	6.78082	0.00217706	0.0125367	0.192942	0.345001	AHSA2
ENSG00000173227	-0.28366	0.216205	0.504659	0.379832	4.02946	0.0704195	0.140019	0.000347325	0.00802656	SYT12
ENSG00000173334	-0.920041	-0.027568	0.242473	0.157355	6.60941	4.01082e-28	0.727363	0.00190376	0.044639	TRIB1
ENSG00000173457	0.282661	0.0606191	-0.275462	-0.115785	5.33431	0.00452937	0.55166	0.00901401	0.263904	PPP1R14B
ENSG00000173517	-0.308553	-0.190303	-0.04573	-0.0665786	6.58595	0.000194127	0.0206712	0.574942	0.414607	PEAK1
ENSG00000173786	-0.0250194	0.178667	0.106369	0.176501	6.96813	0.753049	0.0233388	0.178558	0.0250684	CNP
ENSG00000174021	0.218765	0.180295	-0.273649	0.0928963	5.76982	0.0196522	0.055584	0.00532286	0.327485	GNG5
ENSG00000174332	-0.355356	-0.129715	-0.353627	0.0158827	5.39166	0.00036204	0.183891	0.000396252	0.868982	GLIS1
ENSG00000174839	0.271064	0.0438587	0.276431	0.087357	4.76171	0.01911	0.712327	0.0170291	0.460258	DENND6A
ENSG00000174851	0.490106	0.0567821	-0.22906	0.0320808	6.17586	1.18426e-08	0.521571	0.0115173	0.717722	YIF1A
ENSG00000175130	-0.490933	0.154196	0.132595	0.275358	7.71444	5.33795e-11	0.035032	0.0700842	0.000159277	MARCKSL1
ENSG00000175166	0.439607	0.0230773	-0.154977	-0.0570272	7.83821	2.31103e-09	0.756731	0.0388168	0.445244	PSMD2
ENSG00000175334	-0.0396655	-0.0301279	-0.227086	-0.18941	5.75795	0.671418	0.747397	0.0171103	0.0458325	BANF1
ENSG00000175416	0.295865	0.140742	-0.251604	0.150981	5.28785	0.00383763	0.176161	0.0204248	0.146245	CLTB
ENSG00000175471	-0.470591	0.0706337	0.262801	0.0488721	4.7391	3.89984e-05	0.512297	0.012923	0.650956	MCTP1
ENSG00000175592	0.519997	0.170633	-0.185558	0.0336771	6.73991	1.62018e-10	0.0395982	0.0287719	0.687051	FOSL1
ENSG00000175662	-0.392857	0.0762485	-0.217327	0.102457	6.71922	1.65502e-06	0.339532	0.00742874	0.198698	TOM1L2
ENSG00000175756	0.334752	0.186509	-0.225549	0.0443534	5.63948	0.000413519	0.0523184	0.0240127	0.648583	AURKAIP1
ENSG00000175792	0.0114887	-0.110139	-0.221223	-0.260293	5.27446	0.912039	0.296417	0.038329	0.0151507	RUVBL1
ENSG00000175895	-0.364824	-0.243477	-0.00162373	-0.237432	4.35762	0.00370735	0.0496248	0.989244	0.0553075	PLEKHF2
ENSG00000176014	-0.474044	-0.279512	0.708155	0.291594	7.36652	1.23079e-08	0.00067594	1.56436e-19	0.000250888	TUBB6
ENSG00000176142	-0.190032	-0.122611	-0.145954	-0.206031	5.88773	0.0377565	0.178195	0.109852	0.0246363	TMEM39A
ENSG00000176170	1.13865	-0.0463462	-0.387836	0.0367425	4.96759	2.23148e-24	0.717013	0.00373837	0.771455	SPHK1
ENSG00000176343	0.25933	0.270852	0.041624	0.128171	4.79574	0.0207025	0.0157114	0.717649	0.260414	NA
ENSG00000176410	0.124969	0.452968	0.167058	0.297265	4.01626	0.393713	0.00126582	0.252763	0.0381584	DNAJC30
ENSG00000176692	0.514112	0.244058	-0.122804	0.110224	4.91663	1.02048e-05	0.042557	0.329437	0.367198	FOXC2
ENSG00000176720	0.234936	0.0285178	-0.299055	0.0290714	4.91634	0.036876	0.804807	0.0127457	0.801027	BOK
ENSG00000176788	0.249814	0.0971001	-0.213795	-0.0978535	6.56105	0.00215019	0.2373	0.0107511	0.239186	BASP1
ENSG00000177000	-0.659466	-0.0454418	0.219078	0.00767498	5.35348	1.61756e-10	0.639761	0.0209459	0.936672	MTHFR
ENSG00000177042	-0.447723	-0.00949482	-0.315778	-0.111409	4.4386	0.000232088	0.934518	0.00847273	0.340649	TMEM80
ENSG00000177200	-0.244661	-0.17056	-0.00617833	-0.0663768	6.47749	0.00378968	0.0427006	0.940867	0.427028	CHD9
ENSG00000177469	0.16234	-0.00636717	-0.28114	-0.11576	9.11365	0.0206478	0.927889	7.14122e-05	0.100617	CAVIN1
ENSG00000177606	1.12964	-0.0883672	-0.485572	-0.310622	6.32389	1.08966e-41	0.326077	1.86062e-07	0.000700328	JUN
ENSG00000177674	0.459192	0.185862	0.137535	0.208751	5.2486	4.33739e-06	0.0702664	0.182679	0.0415283	AGTRAP
ENSG00000178209	-0.427551	-0.0885163	-0.256352	-0.0292567	9.10433	1.1154e-09	0.204072	0.000246414	0.674343	PLEC
ENSG00000178531	0.29136	0.0896756	-0.345694	-0.0731602	6.07937	0.000943904	0.31639	0.000195996	0.419594	CTXN1
ENSG00000178726	0.352445	0.105895	0.699945	0.515368	4.52247	0.00297149	0.38672	9.47928e-10	9.93005e-06	THBD
ENSG00000178773	0.429175	-0.156975	-0.20565	-0.110677	6.33971	1.60702e-07	0.0645375	0.0158405	0.190976	CPNE7
ENSG00000178988	-0.280375	-0.183207	-0.0295486	-0.0780608	5.98448	0.00199489	0.0419879	0.739969	0.382118	MRFAP1L1
ENSG00000179163	-0.317964	0.0983408	0.203325	0.151087	7.11416	5.51332e-05	0.203306	0.00826044	0.0500996	FUCA1
ENSG00000179295	0.224912	-0.0103019	-0.193299	-0.0926189	7.35324	0.00319845	0.893668	0.0129233	0.231176	PTPN11
ENSG00000179820	0.904531	0.184023	-0.244022	0.00196418	6.6469	5.90345e-28	0.0321646	0.00591342	0.981982	MYADM
ENSG00000179869	-0.529765	0.0334442	0.2735	0.111346	4.33052	6.63238e-05	0.786991	0.0230303	0.363631	ABCA13
ENSG00000179912	-0.2192	0.0303911	0.196318	0.18674	5.80022	0.0153771	0.732117	0.0252675	0.0333505	R3HDM2
ENSG00000180190	-0.497281	-0.0649802	0.241922	0.0747655	4.45796	5.74565e-05	0.580011	0.0329381	0.517391	TDRP
ENSG00000180530	0.173117	-0.00762454	0.209421	0.15421	6.17385	0.0447372	0.930513	0.0150704	0.0743907	NRIP1
ENSG00000180730	-1.01497	0.0833788	0.40116	0.220045	5.86557	6.25383e-26	0.341271	2.93036e-06	0.0112121	SHISA2
ENSG00000180801	0.463066	-0.0694959	-0.370316	-0.111955	4.89184	4.16611e-05	0.56341	0.00303731	0.354293	ARSJ
ENSG00000180891	-0.257666	0.0474513	-0.00511745	0.17043	6.83502	0.00112142	0.542586	0.947782	0.0278651	CUEDC1
ENSG00000180900	0.187046	-0.0126868	-0.244162	-0.0404295	5.83018	0.0437827	0.893161	0.0114161	0.669344	SCRIB
ENSG00000180914	1.19751	-0.0215186	-1.17171	-0.471724	4.66376	3.77224e-17	0.898183	5.14309e-09	0.0086821	OXTR
ENSG00000181019	-1.14411	0.0701952	0.16787	0.0321927	8.97361	7.14384e-57	0.313038	0.0157177	0.643754	NQO1
ENSG00000181649	0.680164	0.480812	0.0940997	0.284875	4.00453	1.47718e-06	0.000933369	0.53917	0.0560657	PHLDA2
ENSG00000181789	0.144854	-0.0017607	-0.19295	-0.0937775	8.17111	0.0459594	0.98073	0.00852462	0.199503	COPG1
ENSG00000182022	0.224162	0.309061	0.573117	0.394253	4.07677	0.0997021	0.0219836	1.14228e-05	0.00312845	CHST15
ENSG00000182054	0.396095	0.0723729	-0.281431	-0.081448	5.93391	6.61116e-06	0.421746	0.00242664	0.37172	IDH2
ENSG00000182197	0.435479	-0.012212	-0.270184	-0.230265	7.35087	2.10961e-08	0.877685	0.000792119	0.00413437	EXT1
ENSG00000182481	0.564243	-0.00180604	-0.424077	-0.0170521	5.38039	3.3059e-08	0.986685	0.000188883	0.874967	KPNA2
ENSG00000182621	-0.408718	-0.0302266	0.290244	0.215141	4.50005	0.00102792	0.799555	0.011444	0.0628503	PLCB1
ENSG00000182667	0.872496	0.031522	-0.338627	-0.0888899	5.09958	2.58409e-16	0.786776	0.00548683	0.4519	NTM
ENSG00000182752	0.303176	0.0329682	0.108062	0.180014	6.7737	0.000156109	0.68542	0.182554	0.0257539	PAPPA
ENSG00000182809	-0.691768	0.132727	-0.256174	0.0413478	6.89113	5.78384e-17	0.0919419	0.00144657	0.601166	CRIP2
ENSG00000183010	0.504566	-0.0747451	-0.484089	-0.345872	6.05494	5.04167e-09	0.406282	2.10243e-07	0.000171756	PYCR1
ENSG00000183111	-0.430926	0.104745	0.168566	0.231644	4.52075	0.000581969	0.372821	0.148747	0.0454543	ARHGEF37
ENSG00000183454	-0.224893	0.0969514	0.413655	0.318153	4.36435	0.121476	0.486423	0.00198731	0.0186893	GRIN2A
ENSG00000183580	0.312841	0.194242	0.0405195	0.264873	4.42963	0.0105073	0.11792	0.749086	0.0314739	FBXL7
ENSG00000183684	0.356409	-0.0124394	-0.26377	-0.198289	4.65381	0.00284879	0.920771	0.0412067	0.121331	ALYREF
ENSG00000183778	-0.818301	-0.205985	-0.23134	0.0166407	4.537	1.41787e-11	0.067403	0.040689	0.879554	B3GALT5
ENSG00000184009	0.152635	0.0537886	-0.424617	-0.171149	12.1139	0.0226657	0.421923	2.60181e-10	0.0106708	ACTG1
ENSG00000184216	0.650714	0.111868	-0.270902	-0.0429715	7.18222	2.25263e-17	0.153443	0.000705333	0.586243	IRAK1
ENSG00000184226	-1.46607	-0.252569	-0.138297	-0.0667632	5.62547	4.90356e-49	0.00442675	0.116011	0.445287	PCDH9
ENSG00000184347	0.523352	0.0638568	-0.244482	-0.0525186	6.61661	1.24367e-10	0.444297	0.00413296	0.532258	SLIT3
ENSG00000184575	0.170538	-0.0938796	-0.129643	-0.229729	6.51763	0.0398515	0.266267	0.125773	0.00703064	XPOT
ENSG00000184602	0.288301	0.198771	0.311304	0.193997	4.88367	0.00594474	0.0605417	0.00296249	0.0670498	SNN
ENSG00000184838	-0.212985	-0.0305245	-0.214891	-0.246057	6.66227	0.0109697	0.712469	0.010386	0.00339295	PRR16
ENSG00000184898	-0.450035	0.0233302	0.268867	0.0511969	4.67356	0.000137415	0.834784	0.0136119	0.646057	RBM43
ENSG00000185022	0.832458	0.0332919	-0.263903	-0.195708	4.49595	1.20045e-12	0.796167	0.0489592	0.14026	MAFF
ENSG00000185100	-0.677719	0.126115	0.378407	0.185038	4.07546	9.08362e-07	0.311127	0.00174706	0.134335	ADSSL1
ENSG00000185189	-0.201042	-0.185247	-0.111236	-0.0255594	6.44058	0.0167136	0.0274483	0.183447	0.758469	NRBP2
ENSG00000185340	-0.231837	0.0196051	-0.272084	0.0475476	5.26769	0.0214392	0.842228	0.00729242	0.628301	GAS2L1
ENSG00000185499	0.390572	0.313561	0.203182	0.164123	4.37589	0.00290289	0.0181028	0.131276	0.224739	MUC1
ENSG00000185567	0.00664138	-0.173486	-0.271955	-0.130349	7.92016	0.927408	0.0180066	0.000220301	0.0750849	AHNAK2
ENSG00000185585	-0.511305	0.0462299	0.185714	0.168807	7.88842	4.86427e-12	0.524391	0.010289	0.0197085	OLFML2A
ENSG00000185630	-0.100884	0.0279969	0.166868	0.191696	6.11207	0.234207	0.739389	0.0455629	0.0213781	PBX1
ENSG00000185697	0.708152	-0.203816	-0.479934	-0.435687	4.8325	8.02486e-09	0.139181	0.000806061	0.00218416	MYBL1
ENSG00000185721	-0.0709038	0.223124	0.207495	0.138043	5.31246	0.495713	0.0275114	0.0407837	0.176107	DRG1
ENSG00000185745	-0.814074	0.107146	0.337092	0.13873	4.56829	4.47941e-11	0.333634	0.00183865	0.208957	IFIT1
ENSG00000185800	-0.242569	-0.133452	-0.172286	-0.0911526	6.29425	0.00451756	0.11579	0.0429612	0.28126	DMWD
ENSG00000185803	0.204897	-0.015427	-0.314387	-0.0407521	5.47083	0.0390754	0.879265	0.0026992	0.688893	SLC52A2
ENSG00000185909	-0.50977	0.0337496	0.130008	0.209097	5.00915	2.00425e-06	0.739349	0.195976	0.0360157	KLHDC8B
ENSG00000186350	-0.258999	0.0795344	-0.0271016	0.177	6.80665	0.00155161	0.32201	0.73732	0.026741	RXRA
ENSG00000186376	-0.308862	-0.259956	0.0297263	-0.0914762	4.12593	0.0194487	0.0481924	0.814763	0.47723	ZNF75D
ENSG00000186480	0.669684	0.0882865	0.314238	0.334403	4.98033	7.62306e-10	0.446758	0.00550413	0.00304398	INSIG1
ENSG00000186577	0.355467	-0.128095	-0.286962	-0.0392542	4.77039	0.000729068	0.248109	0.0111047	0.720682	C6orf1
ENSG00000187098	-0.506159	-0.0674021	-0.246996	-0.206443	6.15711	1.68909e-08	0.437288	0.00499824	0.0185199	MITF
ENSG00000187109	-0.281408	0.0141074	0.146849	0.0389359	9.4398	4.66712e-05	0.8376	0.032669	0.571488	NAP1L1
ENSG00000187164	0.0236794	-0.233572	-0.0268395	-0.190003	5.61787	0.798441	0.0139057	0.773559	0.044511	SHTN1
ENSG00000187210	0.522813	-0.0665999	0.013049	-0.279775	4.63007	1.55717e-05	0.609106	0.919442	0.0366426	GCNT1
ENSG00000187231	-0.189892	0.0340664	0.367424	0.174311	5.53686	0.0479114	0.717643	6.18631e-05	0.0611219	SESTD1
ENSG00000187244	-0.278057	-0.000520788	-0.200737	0.0091948	7.55643	0.000198981	0.994386	0.00709794	0.901092	BCAM
ENSG00000187498	0.462676	-0.0436257	-0.272416	-0.137226	7.61994	6.81005e-10	0.567788	0.000416772	0.0734751	COL4A1
ENSG00000187840	0.693142	0.114376	-0.435638	-0.173081	4.80139	1.58888e-10	0.321743	0.000417009	0.147068	EIF4EBP1
ENSG00000188229	-1.09687	-0.336165	1.14348	0.461359	7.91673	6.28921e-42	1.34195e-05	6.91899e-54	7.14324e-10	TUBB4B
ENSG00000188643	0.662384	0.0130104	-0.246287	-0.0266703	7.87409	3.07457e-19	0.862776	0.00121158	0.723485	S100A16
ENSG00000189056	0.785521	-0.140818	-0.325615	-0.0484501	5.1502	1.27004e-14	0.208873	0.00447787	0.662105	RELN
ENSG00000189159	0.48612	0.0493071	-0.478993	-0.00521386	5.07118	9.0561e-06	0.668185	9.45719e-05	0.964064	JPT1
ENSG00000196083	0.566813	0.00768843	-0.234551	-0.289881	4.51138	1.51063e-06	0.951388	0.0715113	0.0268619	IL1RAP
ENSG00000196205	-0.0659995	0.130346	-0.235898	0.15741	7.9718	0.36898	0.0744399	0.00142192	0.0310857	NA
ENSG00000196230	-1.39595	-0.383983	1.30699	0.809635	10.0868	9.43313e-87	2.25771e-08	1.82471e-80	2.17523e-32	TUBB
ENSG00000196305	0.17447	-0.100347	-0.270229	-0.157543	7.27514	0.0241469	0.200658	0.000639573	0.0451308	IARS
ENSG00000196365	0.30317	0.0028274	-0.195142	-0.0893888	6.6097	0.000192838	0.972752	0.0199697	0.282892	LONP1
ENSG00000196396	0.24292	-0.117998	-0.198494	-0.104599	6.72984	0.00302856	0.159149	0.0185394	0.211527	PTPN1
ENSG00000196449	-0.0276262	-0.252135	-0.359446	-0.269372	4.268	0.828759	0.0555891	0.00717201	0.0412339	YRDC
ENSG00000196586	0.0772639	-0.217318	-0.229721	-0.25576	6.11429	0.379137	0.0157174	0.0107887	0.00459347	MYO6
ENSG00000196743	-0.203837	0.097589	0.136712	0.193731	5.93985	0.0254798	0.273807	0.124309	0.0286497	GM2A
ENSG00000196782	-0.187938	0.244498	0.184617	0.266717	4.18988	0.15159	0.0492912	0.140788	0.0314709	MAML3
ENSG00000196792	-0.299423	-0.168669	-0.149825	-0.191796	5.56161	0.00191654	0.0772347	0.116067	0.04492	STRN3
ENSG00000196865	-0.262281	-0.267576	-0.00255071	-0.0711259	6.07347	0.0030617	0.0025568	0.976601	0.415518	NHLRC2
ENSG00000196923	0.678926	-0.054225	-0.407129	-0.121457	7.84751	2.57917e-20	0.469935	9.19789e-08	0.106438	PDLIM7
ENSG00000196924	0.270616	-0.0256501	-0.521572	-0.228688	11.7926	5.5158e-05	0.702339	1.01643e-14	0.000665644	FLNA
ENSG00000197070	-0.311398	-0.0962734	-0.297547	-0.146222	5.05807	0.00311719	0.350647	0.00476199	0.158354	ARRDC1
ENSG00000197081	0.0132561	0.021569	0.14143	0.162854	8.49555	0.851909	0.761344	0.0459455	0.0214818	IGF2R
ENSG00000197102	-0.0542723	-0.17682	-0.172665	-0.0409188	8.65165	0.441559	0.0124242	0.0146432	0.561758	DYNC1H1
ENSG00000197121	-0.382359	0.0289306	0.19342	0.104208	5.81706	3.24721e-05	0.745301	0.0279883	0.23924	PGAP1
ENSG00000197183	-0.550147	0.138934	0.197645	0.116871	5.38734	9.63649e-08	0.150028	0.0396399	0.226762	NOL4L
ENSG00000197283	-0.261381	0.0410088	0.0706152	0.159727	6.45858	0.00136812	0.609542	0.378553	0.0453067	SYNGAP1
ENSG00000197451	0.562954	-0.103653	-0.359367	-0.126376	6.15367	2.31679e-10	0.268002	0.000176726	0.177624	HNRNPAB
ENSG00000197467	0.400447	-0.0269067	-0.160497	-0.0500386	7.77467	4.68108e-08	0.716992	0.0314558	0.50055	COL13A1
ENSG00000197712	0.223406	-0.00672687	-0.282747	-0.217224	8.04179	0.00205698	0.926534	0.000123214	0.00310041	FAM114A1
ENSG00000197713	-0.176425	-0.217493	-0.228351	-0.139896	5.53114	0.0728517	0.0278427	0.0211323	0.153944	RPE
ENSG00000197747	-0.213173	-0.0131833	-0.225454	-0.152118	7.8314	0.00410683	0.858209	0.0024324	0.0401979	S100A10
ENSG00000197774	-0.307024	-0.236181	-0.270249	-0.0586066	4.35023	0.0150866	0.0597142	0.0320471	0.632761	EME2
ENSG00000197818	-0.257686	0.0767158	0.140687	0.23978	4.75964	0.028916	0.499576	0.212625	0.0316136	SLC9A8
ENSG00000197879	0.291544	0.0666361	-0.263807	-0.0429195	8.3442	5.57629e-05	0.359752	0.000334001	0.556484	MYO1C
ENSG00000197905	0.464993	-0.21956	-0.47783	-0.330113	4.12075	0.000545914	0.13691	0.00181907	0.0276183	TEAD4
ENSG00000197982	-0.063443	0.219244	-0.192572	0.0187258	5.64731	0.510117	0.0197998	0.0486389	0.844887	C1orf122
ENSG00000198189	-0.273603	0.0284013	0.386816	0.103359	4.65627	0.017452	0.798712	0.000310379	0.349268	HSD17B11
ENSG00000198225	0.579942	0.203745	-0.309682	0.314233	4.25426	5.26133e-06	0.127422	0.0306097	0.0170787	NA
ENSG00000198604	0.391176	-0.299564	0.13415	-0.103887	4.57656	0.000879388	0.0193651	0.269331	0.405609	BAZ1A
ENSG00000198682	0.817569	-0.0177899	-0.212205	-0.190737	7.86372	4.20468e-29	0.811239	0.00469569	0.010955	PAPSS2
ENSG00000198695	-0.29096	-0.379832	-0.374089	-0.367854	9.0205	2.78721e-05	4.79545e-08	7.59914e-08	1.23515e-07	ND6
ENSG00000198712	-0.0537991	-0.292412	-0.268548	-0.32246	11.0986	0.423906	1.43526e-05	6.74361e-05	1.72886e-06	COX2
ENSG00000198727	-0.176782	-0.328318	-0.301165	-0.314809	11.0695	0.00862262	1.1089e-06	7.83897e-06	2.98941e-06	CYTB
ENSG00000198743	-0.72725	-0.148212	-0.119782	-0.111842	8.03854	6.11367e-23	0.040156	0.0969967	0.121077	SLC5A3
ENSG00000198756	-0.898043	0.153031	0.359004	0.524823	4.33525	3.05696e-11	0.196163	0.0019182	3.78883e-06	COLGALT2
ENSG00000198763	-0.0234541	-0.220793	-0.302987	-0.24753	9.98093	0.731108	0.00124919	9.71966e-06	0.000298066	ND2
ENSG00000198786	-0.226191	-0.376859	-0.328199	-0.350415	11.1556	0.000767527	2.18308e-08	1.07928e-06	1.93313e-07	ND5
ENSG00000198792	0.227714	0.0383288	-0.210108	-0.0266345	7.48001	0.00259052	0.614812	0.00637609	0.727255	TMEM184B
ENSG00000198804	-0.257508	-0.333761	-0.304339	-0.311776	12.2258	0.000118292	6.14579e-07	5.4149e-06	3.17791e-06	COX1
ENSG00000198840	-0.0758923	-0.198919	-0.254774	-0.215256	9.0026	0.275656	0.00436764	0.000266153	0.00204546	ND3
ENSG00000198873	0.280563	-0.172243	-0.388594	-0.0992828	4.06828	0.0217403	0.183654	0.00357159	0.439018	GRK5
ENSG00000198886	-0.135579	-0.295349	-0.311882	-0.289725	12.4623	0.0424408	1.00434e-05	3.11918e-06	1.47534e-05	ND4
ENSG00000198888	-0.121237	-0.161511	-0.196855	-0.113036	10.209	0.0749985	0.0177573	0.00387568	0.0969088	ND1
ENSG00000198899	-0.12364	-0.331084	-0.246204	-0.33433	10.3101	0.0682737	1.11436e-06	0.000288483	8.74685e-07	ATP6
ENSG00000198911	0.662467	0.0403299	-0.170389	-0.0133764	7.44632	1.01701e-18	0.598339	0.0275112	0.861598	SREBF2
ENSG00000198919	-0.513186	-0.0767358	0.299351	0.146764	4.78317	7.17117e-06	0.481141	0.00428047	0.167539	DZIP3
ENSG00000198938	-0.200916	-0.278527	-0.309146	-0.287221	11.3635	0.002785	3.42915e-05	4.28678e-06	1.93773e-05	COX3
ENSG00000198959	0.625314	0.120693	-0.11031	0.148465	11.6235	1.5478e-20	0.0723399	0.100772	0.027069	TGM2
ENSG00000203805	0.520324	0.0509317	-0.262048	0.0672708	5.96543	3.78517e-09	0.577674	0.00530759	0.461417	PLPP4
ENSG00000204178	-0.0844773	0.241047	0.24128	0.209143	4.83019	0.457196	0.028108	0.0280379	0.0575467	TMEM57
ENSG00000204262	0.169468	-0.184247	-0.208883	-0.248175	7.24989	0.0276899	0.0185965	0.00772005	0.00157836	COL5A2
ENSG00000204389	-0.650165	-0.255836	-0.154622	-0.196858	4.70011	6.26015e-07	0.0394361	0.207701	0.110257	HSPA1A
ENSG00000204498	-0.193704	0.326212	0.216485	0.386504	4.30224	0.127147	0.0062949	0.0736201	0.00111278	NFKBIL1
ENSG00000205352	0.133131	0.27827	0.344858	0.313027	4.27416	0.324665	0.0362872	0.00892383	0.017967	PRR13
ENSG00000205356	-0.113015	-0.152419	-0.36256	-0.212594	5.41062	0.245865	0.119447	0.000287703	0.030787	TECPR1
ENSG00000205517	-0.344457	-0.116264	0.254596	0.0812414	4.45857	0.00323612	0.308118	0.0201102	0.466334	RGL3
ENSG00000205542	0.189392	-0.147124	-0.127466	-0.209284	6.84779	0.0159381	0.0658595	0.110739	0.00911613	TMSB4X
ENSG00000205758	-0.419992	-0.295322	0.0340296	-0.0835634	5.02625	9.72598e-05	0.0055387	0.740876	0.42198	CRYZL1
ENSG00000206538	1.06207	-0.114901	-0.193668	-0.262571	6.16806	8.43915e-29	0.27875	0.07042	0.0148309	VGLL3
ENSG00000210082	-0.237788	-0.248228	-0.194497	-0.280289	11.3203	0.000398394	0.000218897	0.00376521	3.01319e-05	RNR2
ENSG00000211459	-0.290553	-0.214175	-0.175773	-0.386311	7.91846	6.52708e-05	0.00318418	0.0153877	1.22928e-07	RNR1
ENSG00000212907	-0.0848596	-0.247128	-0.314649	-0.261021	9.27264	0.219415	0.000362072	5.77554e-06	0.000165906	ND4L
ENSG00000213352	-0.185917	0.110363	-0.266938	0.139159	6.53086	0.0259744	0.178636	0.00149664	0.0893322	NA
ENSG00000213366	-0.706505	-0.018904	0.300878	0.0123969	5.0566	8.97132e-11	0.852042	0.00222775	0.902322	GSTM2
ENSG00000213493	0.326205	-0.0320535	-0.336242	-0.0910803	4.88426	0.00368187	0.784381	0.00569699	0.439946	NA
ENSG00000213553	0.12754	0.198268	0.00190719	0.176781	7.39432	0.094036	0.00909351	0.980141	0.0201145	NA
ENSG00000213626	0.195964	0.0128062	-0.481782	-0.26352	7.00057	0.0152816	0.875404	1.1432e-08	0.00151426	LBH
ENSG00000213763	0.495581	0.0327291	-0.725267	-0.258792	5.51116	1.32442e-06	0.760714	6.51492e-10	0.0196712	NA
ENSG00000213867	0.333993	0.356375	-0.334181	0.478551	4.89856	0.00295731	0.00150328	0.00606342	1.56629e-05	NA
ENSG00000214021	-0.398212	-0.241887	0.116287	0.0891023	5.95083	8.35497e-06	0.00618423	0.176794	0.301288	TTLL3
ENSG00000214063	-0.160721	-0.0103112	-0.182126	0.00147693	8.08818	0.0255334	0.885666	0.0114782	0.983562	TSPAN4
ENSG00000214174	-0.438664	-0.0366421	0.2999	-0.0308998	4.1459	0.000943687	0.771511	0.0133387	0.806349	AMZ2P1
ENSG00000214391	-1.351	-0.260265	1.63064	0.879699	4.46675	2.63228e-15	0.0746846	1.8434e-44	3.08603e-12	NA
ENSG00000214548	-0.150974	-0.248252	0.140945	0.0236738	9.80088	0.0268514	0.000277842	0.0383442	0.728099	MEG3
ENSG00000214706	0.262302	-0.0260249	-0.35292	-0.137736	4.97676	0.0138358	0.813044	0.0020175	0.216263	IFRD2
ENSG00000214944	0.123258	-0.0675224	-0.199694	-0.245408	6.08383	0.158353	0.446562	0.0259634	0.00637129	ARHGEF28
ENSG00000215030	0.0819689	0.203775	-0.164431	0.158469	8.22275	0.255032	0.00456476	0.023396	0.027548	NA
ENSG00000215057	-0.321764	-0.0222269	0.257582	-0.112791	5.15641	0.00321295	0.833699	0.0123614	0.291194	NA
ENSG00000215712	0.214005	0.258988	0.322006	0.309368	4.81584	0.055961	0.0202888	0.00368857	0.00530046	TMEM242
ENSG00000218582	-0.0578724	0.229559	-0.0493988	0.331977	5.81157	0.539131	0.0127002	0.600494	0.000279631	NA
ENSG00000221963	-1.28525	-0.0106265	0.205839	-0.0431972	4.94154	2.75966e-28	0.916169	0.0374973	0.669663	APOL6
ENSG00000222009	-0.238051	-0.283056	0.00563476	0.03532	5.44811	0.0142127	0.00374638	0.952763	0.709471	BTBD19
ENSG00000224596	-0.316365	-0.393859	0.363947	0.104926	4.47968	0.00960743	0.00143881	0.00128788	0.366975	ZMIZ1-AS1
ENSG00000225156	-0.504356	-0.0848609	0.195893	0.0578031	5.3613	4.40404e-07	0.376785	0.0366308	0.54195	NA
ENSG00000225830	-0.465491	-0.216223	-0.0485659	-0.219792	7.95692	2.52914e-10	0.00304024	0.503485	0.0025919	ERCC6
ENSG00000226360	0.200852	0.206871	0.0937626	0.218866	5.14461	0.053282	0.0467062	0.373072	0.0350926	NA
ENSG00000226415	0.224018	-0.0105783	-0.197562	-0.102841	8.72685	0.00148618	0.881251	0.00547553	0.147209	NA
ENSG00000226608	-0.204668	0.118305	0.244264	0.170195	6.88095	0.0108333	0.134346	0.00188059	0.0308195	NA
ENSG00000226742	-0.344341	-0.0663457	0.268025	0.228344	4.02515	0.0106431	0.610471	0.031992	0.0687862	HSBP1L1
ENSG00000227500	0.0415483	0.181614	-0.0254594	0.207488	6.34788	0.624348	0.0309456	0.765456	0.0135309	SCAMP4
ENSG00000228253	-0.0644888	-0.311333	-0.220493	-0.277118	7.96961	0.377456	2.41071e-05	0.00269827	0.000167196	ATP8
ENSG00000230581	0.202506	0.24255	-0.385713	-0.0637279	5.03107	0.0702939	0.0296975	0.00132042	0.580938	NA
ENSG00000232368	-0.119155	0.257847	-0.000866174	0.209096	5.46538	0.228525	0.00707755	0.992951	0.0296048	NA
ENSG00000233016	-0.244013	0.208759	0.118924	0.0702292	5.53384	0.010805	0.0235213	0.20044	0.451162	SNHG7
ENSG00000235162	0.50003	-0.0582468	-0.443712	-0.320543	6.21783	3.59314e-09	0.508041	1.03618e-06	0.000359191	C12orf75
ENSG00000235587	-0.117059	0.148431	0.148883	0.134991	9.21598	0.0930252	0.0325565	0.0320455	0.0519274	NA
ENSG00000235847	-0.0147395	-0.0506555	-0.189041	-0.192806	5.90064	0.872672	0.583352	0.0432034	0.0391479	NA
ENSG00000236480	-0.304876	0.0488543	-0.419458	0.037543	6.42553	0.000394559	0.561013	1.39348e-06	0.655248	NA
ENSG00000236811	-0.0797998	0.267005	-0.37829	0.216212	6.93381	0.320646	0.000726874	3.86944e-06	0.00632752	NA
ENSG00000239672	0.648339	0.0568316	-0.486229	-0.333354	5.01048	1.26574e-09	0.617532	6.32794e-05	0.00514214	NME1
ENSG00000240476	0.332919	-0.107453	-0.294049	-0.0677304	4.43806	0.00580645	0.399612	0.024537	0.593496	NA
ENSG00000242086	-0.497407	-0.308618	0.0429108	-0.244879	4.01944	0.000187314	0.0177122	0.730405	0.0576906	SDHAP2
ENSG00000242265	-0.618061	-0.0178379	-0.0824616	-0.157777	8.00182	7.92688e-17	0.80594	0.257066	0.0304684	PEG10
ENSG00000244509	-0.289981	0.221366	0.329319	0.329346	4.30206	0.0331767	0.0829776	0.00899964	0.00893595	APOBEC3C
ENSG00000244560	-0.262568	-0.32334	-0.0573707	-0.0685687	4.34353	0.0270894	0.00700271	0.62151	0.555283	LOC155060
ENSG00000245060	-0.283737	0.0779538	0.365733	0.1342	4.03649	0.0381256	0.551057	0.00376058	0.30112	LINC00847
ENSG00000245532	-0.0463497	-0.264723	0.299633	0.0667535	9.60229	0.499574	0.000121201	1.21375e-05	0.330365	NEAT1
ENSG00000248527	-0.082597	-0.264265	-0.303692	-0.368111	7.01237	0.286113	0.000725303	0.0001067	2.83747e-06	NA
ENSG00000249489	-0.16571	0.155214	-0.290038	0.159761	8.42361	0.0212525	0.0297448	5.95062e-05	0.0252559	NA
ENSG00000249992	2.33122	0.0989777	-0.454126	-0.286638	4.28202	1.11882e-72	0.564049	0.0149234	0.114582	TMEM158
ENSG00000250510	-0.939504	0.0725775	0.276336	0.380169	5.17889	1.62894e-18	0.452013	0.00357481	5.23539e-05	GPR162
ENSG00000251562	-0.214341	-0.330945	0.246898	-0.293107	7.61992	0.00382734	8.89104e-06	0.000731162	8.10828e-05	MALAT1
ENSG00000253276	0.27342	0.0163987	-0.213227	-0.142152	5.67514	0.00489791	0.869252	0.0365198	0.15996	CCDC71L
ENSG00000253341	-0.214313	-0.0334659	0.1715	0.141035	6.61521	0.0088321	0.679625	0.0324122	0.0788804	NA
ENSG00000253506	-0.365965	0.0166489	0.283247	0.030526	5.38184	0.000358	0.866236	0.00334203	0.757074	NACA2
ENSG00000253729	0.293987	-0.15875	-0.225456	-0.138657	7.2416	0.000148576	0.0450575	0.0045818	0.0796806	PRKDC
ENSG00000253797	-0.449069	-0.193254	-0.28356	-0.0863176	4.96463	6.21857e-05	0.0765224	0.0101303	0.423305	UTP14C
ENSG00000253873	-0.321365	0.148384	0.218584	0.236396	7.76561	1.79247e-05	0.0441033	0.00296906	0.00130335	PCDHGA11
ENSG00000254221	-0.245172	0.0203666	0.100155	0.240741	4.45162	0.0453109	0.863879	0.39502	0.0375711	PCDHGB1
ENSG00000256043	-0.286679	0.0918034	0.262836	0.117997	5.98636	0.00182514	0.303846	0.00288623	0.185364	CTSO
ENSG00000256235	0.658142	0.233783	0.249971	0.280945	6.45185	2.21746e-15	0.00600261	0.00328359	0.000925764	SMIM3
ENSG00000257354	-0.212787	-0.262092	0.181412	0.0635917	5.62355	0.0244294	0.0058575	0.0476547	0.491413	NA
ENSG00000258890	-0.435696	-0.0375762	0.349817	0.0448342	5.03631	5.025e-05	0.715648	0.000434163	0.661117	CEP95
ENSG00000259439	-0.545879	0.0438777	0.123941	0.14532	7.67328	6.21243e-13	0.553692	0.0935705	0.0490872	LINC01833
ENSG00000259706	-0.228439	-0.117896	0.111223	-0.176374	7.25751	0.0028979	0.122621	0.141631	0.0212303	HSP90B2P
ENSG00000261801	-0.598022	-0.0898449	-0.255335	-0.075743	4.8779	6.22087e-08	0.390475	0.0165568	0.468331	LOXL1-AS1
ENSG00000264112	-0.440435	-0.326272	0.213602	-0.0317989	4.60527	9.48687e-05	0.00344233	0.0424135	0.768219	NA
ENSG00000265808	0.221765	-0.121664	-0.101115	-0.189502	6.34101	0.00856592	0.159106	0.241382	0.0290584	SEC22B
ENSG00000266028	0.227267	0.000151912	0.208654	0.165575	5.59306	0.0142644	0.998719	0.0248981	0.0759554	SRGAP2
ENSG00000272888	-0.231556	0.092589	0.238522	0.0622373	5.10823	0.0302119	0.37073	0.0193844	0.548503	NA
ENSG00000273559	-0.39096	-0.255932	-0.0789167	-0.0497524	4.6014	0.000981109	0.0285839	0.490939	0.662752	CWC25
ENSG00000273611	-0.00118554	0.107285	0.274038	0.227378	4.60091	0.99195	0.355947	0.016336	0.0472717	ZNHIT3
ENSG00000275700	-0.331077	0.0658363	0.246497	0.151375	6.60616	5.92626e-05	0.413889	0.00202266	0.0591121	AATF
ENSG00000275832	-0.251879	-0.0346284	-0.331419	-0.095165	7.31591	0.00119782	0.652935	2.22886e-05	0.217743	ARHGAP23
ENSG00000277443	0.211945	-0.0331	-0.253772	-0.162585	7.77486	0.00421398	0.657676	0.000759991	0.03031	MARCKS
ENSG00000277998	-0.504762	-0.351021	0.0214288	-0.181245	4.75038	7.67937e-06	0.00156671	0.840698	0.0959809	NA
ENSG00000281649	-0.155226	-0.132292	-0.0161977	-0.16403	6.97279	0.0492058	0.093534	0.836409	0.0378832	EBLN3P

## Sheet: Fig. 1e
GO Biological Term enrichment
	GO Biological Term (high drug doses)	- Log 10 BH adjusted p-val
6h quadrant IV	cytoskeleton-dependent intracellular transport (GO:0030705)	5.22734
	regulation of cell cycle G2/M phase transition (GO:1902749)	5.22734
	ciliary basal body-plasma membrane docking (GO:0097711)	5.1147
	cell cycle G2/M phase transition (GO:0044839)	4.73502
	G2/M transition of mitotic cell cycle (GO:0000086)	4.73502
6h quadrant II	regulation of apoptotic process (GO:0042981)	2.45207
	regulation of wound healing (GO:0061041)	2.45207
	regulation of cell death (GO:0010941)	2.45207
	positive regulation of cellular process (GO:0048522)	2.45207
	regulation of cell migration (GO:0030334)	2.45207

## Sheet: Fig. 1f
GO Biological Term enrichment
	GO Biological Term (high drug doses)	- Log 10 BH adjusted p-val
24h quadrant IV	cytoskeleton-dependent intracellular transport (GO:0030705)	2.34045
24h quadrant II	G1/S transition of mitotic cell cycle (GO:0000082)	5.14042
	regulation of apoptotic process (GO:0042981)	3.93412
	regulation of cell migration (GO:0030334)	3.89939
	positive regulation of cellular process (GO:0048522)	3.84222
	regulation of alcohol biosynthetic process (GO:1902930)	3.67596

## Sheet: Fig. 2a
mRNA counts per million reads (Log2)
ENSGID	dmso.6h.1	dmso.6h.2	dmso.6h.3	dmso.6h.4	dmso.24.1	dmso.24.2	dmso.24.3	average	sd	GeneName
ENSG00000196230	9.7729	9.87623	10.1054	10.0099	9.89618	9.88986	9.86854	9.91701	0.108082	TUBB
ENSG00000167552	8.0899	8.25252	8.48346	8.28546	7.83435	7.92074	7.85798	8.10348	0.246979	TUBA1A
ENSG00000188229	7.65869	7.78833	8.39897	8.20327	7.37336	7.50307	7.31835	7.74915	0.413434	TUBB4B
ENSG00000176014	7.3084	7.59155	7.93637	7.78334	6.76758	6.84383	6.67035	7.27163	0.517374	TUBB6
ENSG00000123416	6.08198	6.32435	6.56327	6.47117	5.87419	5.94807	5.73489	6.14256	0.315633	TUBA1B
ENSG00000127589	5.72344	5.86233	6.06577	5.95737	5.7391	5.82289	5.79234	5.85189	0.122874	TUBBP1
ENSG00000167553	5.20693	5.17856	5.62216	5.48729	4.80822	4.90488	4.77928	5.14105	0.330284	TUBA1C
ENSG00000131462	5.02808	5.08414	5.0227	4.86991	4.5603	4.80592	4.66089	4.8617	0.198927	TUBG1
ENSG00000127824	4.6252	4.48869	4.50187	4.45487	4.89816	4.92074	4.80528	4.67069	0.201104	TUBA4A
ENSG00000214391	4.25152	4.35644	4.67875	4.80279	3.83331	3.81443	4.01287	4.25002	0.391645	TUBAP2
ENSG00000037042	4.17421	3.78297	4.25132	4.24337	4.34457	4.63385	4.73489	4.30931	0.313763	TUBG2
ENSG00000074935	3.16091	2.74821	3.34754	3.69588	3.83331	3.33577	3.45735	3.36843	0.356017	TUBE1
ENSG00000137267	3.13395	2.81692	3.0372	3.93404	1.6383	2.35923	2.31985	2.7485	0.731428	TUBB2A
ENSG00000258947	2.49349	2.14554	2.48081	2.49794	1.7123	2.76259	2.66089	2.39336	0.356317	TUBB3
ENSG00000220418	2.26401	2.19801	1.85277	2.31737	0.39037	1.9286	1.73489	1.81229	0.664698	TUBB3P1
ENSG00000108423	1.57595	1.29755	1.56327	0.995439	1.47783	1.21239	1.99792	1.44576	0.320387	TUBD1
ENSG00000237972	0.865458	-0.609346	-1.60666	0.732405	0.39037	0.212391	0.997923	0.140364	0.939283	TUBG1P
ENSG00000235207	0.727955	1.56058	0.978306	1.41048	1.6383	1.57496	1.22032	1.30156	0.34332	TUBBP6
ENSG00000161149	0.213382	1.29755	0.978306	-1.58952	0.560295	0.405036	0.997923	0.408995	0.958794	TUBA3FP
ENSG00000137285	-1.59397	-2.60935	-1.60666	-0.589523	-1.02467	-2.59496	-1.00208	-1.57446	0.786747	TUBB2B

## Sheet: Fig. 2b
Unspliced pre-mRNA (6h)
		dCt expression
Experiment	Gene	DMSO	1nM CA4	100nM CA4	DMSO	3nM PTX	300nM PTX
1	TUBA1A		0.0920472	0.0835029	1.37453	1.9569	1.7888
2	TUBA1A		0.118451	0.102295	1.71771	1.50347	1.8905
3	TUBA1A		0.120772	0.0737608	1.32222	1.65697	1.36415
1	TUBB	1.08558	0.036823	0.0288154	1.05844	1.06486	0.968617
2	TUBB	0.918021	0.0245559	0.0305904	0.766981	0.699157	0.802476
3	TUBB	0.949715	0.0287219	0.0363477	0.908413	1.18713	1.10274
dCT Average	TUBA1A		0.110424	0.0865197	1.47149	1.70578	1.69839
	TUBB	0.984438	0.0300336	0.0319178	0.911279	0.983716	0.957946
ddCT		DMSO (all)	1nM CA4	100nM CA4		3nM PTX	300nM PTX
	TUBA1A	1	1.29221	1.01248		1.15922	1.14248
	TUBB	1	1.14892	1.221		1.07949	1.05121
SD		DMSO (all)	1nM CA4	100nM CA4		3nM PTX	300nM PTX
	TUBA1A	0.145998	0.18673	0.169737		0.15673	0.189737
	TUBB	0.0904196	0.238625	0.150633		0.278625	0.165063
P-Value			1nM CA4	100nM CA4		3nM PTX	300nM PTX
	TUBA1A		0.55757	0.422443		0.255757	0.372244
	TUBB		0.430921	0.463178		0.743092	0.686318

## Sheet: Fig. 2c
Unspliced pre-mRNA (24h)
		dCq expression
Experiment	Gene	DMSO	1nM CA4	100nM CA4	DMSO	3nM PTX	300nM PTX
1	TUBA1A	1.05844	0.62215	0.842023	2.2888	1.25999	2.0327
2	TUBA1A	0.766981	0.830095	0.941815	1.54131	1.16752	2.23846
3	TUBA1A	0.908413	0.706411	1.01634	2.22214	1.69908	1.82286
1	TUBB	0.834302	0.861643	0.983079	0.824242	0.879814	0.779979
2	TUBB	0.734282	0.634105	0.743204	0.562021	0.77892	0.884391
3	TUBB	0.838473	0.831014	0.926878	0.894153	0.826291	0.800173
dCT Average	TUBA1A	0.911279	0.719552	0.933391	2.01742	1.37553	2.03134
	TUBB	0.802352	0.775588	0.884387	0.760138	0.828341	0.821515
ddCT		DMSO (all)	1nM CA4	100nM CA4		3nM PTX	300nM PTX
	TUBA1A	1	0.789606	1.02426		0.681827	1.0069
	TUBB	1	0.966643	1.10224		1.08972	1.08074
SD		DMSO (all)	1nM CA4	100nM CA4		3nM PTX	300nM PTX
	TUBA1A	0.205046	0.114776	0.0959762		0.140771	0.103005
	TUBB	0.230352	0.153898	0.15636		0.0664066	0.0728568
P-Value			1nM CA4	100nM CA4		3nM PTX	300nM PTX
	TUBA1A		0.133681	0.797259		0.651345	0.899843
	TUBB		0.71792	0.389623		0.518539	0.55359

## Sheet: Fig. 2d
Spliced mRNA (6h)
		dCq expression
Experiment	Gene	DMSO	1nM CA4	100nM CA4	DMSO	3nM PTX	300nM PTX
1	TUBA1A	7.47263	5.0216	2.10585	7.70154	10.749	19.1267
2	TUBA1A	9.83965	4.25735	2.42778	6.46628	10.9536	12.2312
3	TUBA1A	9.60874	6.00152	2.29292	9.11392	9.92736	11.6862
1	TUBB	0.524549	0.291392	0.0781933	0.428476	0.639372	0.742476
2	TUBB	0.52344	0.253663	0.093735	0.446151	0.705567	0.760372
3	TUBB	0.446705	0.389951	0.104647	0.495537	0.636512	0.949255
dCT Average	TUBA1A	8.97367	5.09349	2.27552	7.76058	10.5433	14.348
	TUBB	0.498231	0.311669	0.0921919	0.456721	0.660484	0.614518
ddCT		DMSO (all)	1nM CA4	100nM CA4		3nM PTX	300nM PTX
	TUBA1A	1	0.567604	0.253577		1.35858	1.84883
	TUBB	1	0.62555	0.185038		1.44614	1.78964
SD		DMSO (all)	1nM CA4	100nM CA4		3nM PTX	300nM PTX
	TUBA1A	0.145432	0.0974302	0.0180164		0.0699904	0.534423
	TUBB	0.0895692	0.141241	0.0266831		0.0855434	0.250849
P-Value			1nM CA4	100nM CA4		3nM PTX	300nM PTX
	TUBA1A		0.0127586	0.000148968		0.038227	0.0322366
	TUBB		0.0246167	7.22817e-05		0.00252459	0.00295817

## Sheet: Fig. 2e
Spliced mRNA (24h)
Experiment	Gene	DMSO	1nM CA4	100nM CA4	DMSO	3nM PTX	300nM PTX
1	TUBA1A	3.53109	2.33432	1.89419	4.01668	6.39442	11.9673
2	TUBA1A	5.2997	2.40011	1.33011	3.94668	6.27822	12.7207
3	TUBA1A	3.85511	2.38593	1.3189	3.23021	6.21787	11.5138
1	TUBB	0.469802	0.192993	0.133246	0.4769	0.486267	0.911334
2	TUBB	0.309362	0.176021	0.112349	0.348382	0.54413	1.12391
3	TUBB	0.30713	0.208786	0.105171	0.2605	0.571765	0.857209
dCT Average	TUBA1A	4.22863	2.37345	1.5144	3.73119	6.29684	12.0673
	TUBB	0.362098	0.1926	0.116922	0.361927	0.534054	0.96415
ddCT		DMSO (all)	1nM CA4	100nM CA4		3nM PTX	300nM PTX
	TUBA1A	1	0.561281	0.35813		1.68762	3.23416
	TUBB	1	0.5319	0.322901		1.47558	2.66393
SD		DMSO (all)	1nM CA4	100nM CA4		3nM PTX	300nM PTX
	TUBA1A	0.116658	0.00818866	0.0777916		0.0240501	0.163392
	TUBB	0.300708	0.0452535	0.0402805		0.12055	0.389512
P-Value			1nM CA4	100nM CA4		3nM PTX	300nM PTX
	TUBA1A		0.0104563	0.00393243		0.00168806	9.95397e-05
	TUBB		0.0146353	0.00208622		0.0825807	0.00651187

## Sheet: Fig. 4b
Unspliced pre-mRNA
		dCq expression
		DMSO			GDC-0941
Experiment	Gene	WT	H1047R	E545K	WT	H1047R	E545K
1	TUBA1A	0.108004	0.181715	0.0899397	1.60487	0.385886	1.19152
2	TUBA1A	0.143108	0.17967	0.0671985	1.11009	0.81542	1.07139
3	TUBA1A	0.206247	0.192993	0.104016	1.01436	0.683098	0.705223
4	TUBA1A	0.177921	0.107505	0.113093	1.41688	0.42803	1.07901
1	TUBB	0.0279385	0.107224	0.0395919	0.227884	0.0272043	0.0936374
2	TUBB	0.041077	0.0896881	0.0234807	0.10599	0.0547072	0.0772522
3	TUBB	0.0879588	0.0774119	0.056501	0.134411	0.0709978	0.0843351
4	TUBB	0.076552	0.047053	0.0406009	0.191066	0.062773	0.0613455
dCT Average	TUBA1A	0.15882	0.165471	0.0935618	1.28655	0.578109	1.01178
	TUBB	0.0583816	0.0803442	0.0400437	0.164838	0.0539206	0.0791425
ddCT		WT	H1047R	E545K	WT	H1047R	E545K
	TUBA1A	1	1.04188	0.589106	8.10068	3.64003	6.37063
	TUBB	1	1.37619	0.685896	2.82346	0.923589	1.35561
SD		WT	H1047R	E545K	WT	H1047R	E545K
	TUBA1A	0.268205	0.246099	0.125871	1.71873	1.29454	2.2834
	TUBB	0.487612	0.434083	0.231013	0.94086	0.325652	0.29402
P-Value		WT	H1047R	E545K	WT	H1047R	E545K
compared to DMSO-treated WT cell line	TUBA1A		0.851989	0.0277579	0.00266068	0.00563553	0.00469843
	TUBB		0.433053	0.251151	0.0537724	0.764198	0.315354
compared to DMSO-treated same cell line	TUBA1A				0.00266068	0.00512775	0.00106759
	TUBB				0.0537724	0.327359	0.0331376

[truncated: 17 more sheets: Fig. 4c, Fig. 4d, Fig. 4f, Fig. 4g, Fig. 4h, Fig. 4j, Supp. Fig. 1a, Supp. Fig. 1b, Supp. Fig. 1c, Supp. Fig. 1d, Supp. Fig. 3b, Supp. Fig. 3c, Supp. Fig. 3d, Supp. Fig. 3f, Supp. Fig. 3g, Supp. Fig. 3h, Supp. Fig. 4a]
